# Supplementary material for: Differences in the gut microbiota of dogs (Canis lupus familiaris) fed a natural diet or a commercial feed revealed by the Illumina MiSeq platform
Source: Gut Pathog. 2017 Nov 21;9:68. doi: 10.1186/s13099-017-0218-5 (PMC5697093; doi:10.1186/s13099-017-0218-5)
Supplement: Supplementary file 1 — Additional file 1. PCR amplification conditions and primer sequence for bacterial DNA amplification. [file 13099_2017_218_MOESM1_ESM.xlsx]

## Sheet: supple1
		Primers	Nucleotide sequences (5' to 3')	PCR conditions
	Bacterial amplification	341F	TCGTCGGCAGCGTCAGATGTGTATAAGAGACAGCCTACGGGNGGCWGCAG	Initial denaturation at 95°C for 3min, followed by 25cycles of denaturation at 95°C for 30 sec, primer annealing at 55°C for 30 sec, and extension at 72°C for 30 sec, with a final elongation at 72°C for 5 min
		805R	GTCTCGTGGGCTCGGAGATGTGTATAAGAGACAGGACTACHVGGGTATCTAATCC
	Second amplification	I5	AATGATACGGCGACCACCGAGATCTACAC-XXXXXXXX-TCGTCGGCAGCGTC	initial denaturation at 95°C for 3min, followed by 8 cycles of denaturation at 95°C for 30 sec, primer annealing at 55°C for 30 sec, and extension at 72°C for 30 sec, with a final elongation at 72°C for 5 min
		I7	CAAGCAGAAGACGGCATACGAGAT-XXXXXXXX-AGTCTCGTGGGCTCGG
