# Supplementary material for: Differences in the gut microbiota of dogs (Canis lupus familiaris) fed a natural diet or a commercial feed revealed by the Illumina MiSeq platform
Source: Gut Pathog. 2017 Nov 21;9:68. doi: 10.1186/s13099-017-0218-5 (PMC5697093; doi:10.1186/s13099-017-0218-5)
Supplement: Supplementary file 2 — Additional file 2. The raw data of diversity indices for all samples. [file 13099_2017_218_MOESM2_ESM.xlsx]

## Sheet: Sheet0
Target reads	Valid reads	OTUs	Ace	HCI	LCI	Chao1	HCI	LCI	JackKnife	HCI	LCI	NPShannon	Shannon	HCI	LCI	Simpson	HCI	LCI	Goods Lib. Coverage
ND-1	15475	186	215.438	236.319	199.084	199.722	217.465	191.984	225	225	225	2.66	2.63185	2.66156	2.60213	0.169206	0.174464	0.163948	99.7107
ND-2	14626	218	234.505	247.504	223.53	224.739	236.284	220.484	249	249	249	3	2.97457	3.003	2.94613	0.0966456	0.0991339	0.0941573	99.7523
ND-3	13080	215	233.299	247.236	221.845	220.577	230.883	216.958	245	245	245	3.47	3.4408	3.46731	3.41429	0.0543528	0.055826	0.0528797	99.7219
ND-4	14897	252	271.67	285.779	259.881	259.48	271.442	254.878	286	286	286	3.33	3.30331	3.33057	3.27605	0.0693228	0.0711685	0.0674771	99.735
ND-5	15370	222	270.544	299.934	248.238	244.167	266.009	233.165	279	279	279	2.94	2.90526	2.93119	2.87933	0.0963049	0.0985252	0.0940846	99.5751
ND-6	14114	255	265.405	274.513	257.544	258.652	266.994	256.112	281	281	281	2.95	2.91661	2.94824	2.88499	0.10882	0.111809	0.105831	99.7773
CF-1	16542	161	178.025	192.789	167.168	168.131	180.298	163.635	191	191	191	1.95	1.92052	1.94833	1.89272	0.259842	0.26468	0.255003	99.7801
CF-2	18556	136	170.491	197.568	151.25	150.875	170.955	142.33	171	171	171	2.28	2.26487	2.28692	2.24283	0.181476	0.185673	0.177279	99.7912
CF-3	15725	92	114.175	135.784	100.003	104.5	125.44	96.6726	117	117	117	1.85	1.83935	1.86227	1.81643	0.243098	0.247938	0.238258	99.8135
CF-4	16852	142	163.902	182.025	150.537	152.357	168.478	146.051	172	172	172	2.16	2.14143	2.16734	2.11553	0.228071	0.233495	0.222647	99.8003
CF-5	16258	131	151.605	169.997	137.977	140.667	156.186	134.71	160	160	160	2.69	2.67242	2.69358	2.65125	0.104706	0.106837	0.102575	99.7938
