# Supplementary material for: Differences in the gut microbiota of dogs (Canis lupus familiaris) fed a natural diet or a commercial feed revealed by the Illumina MiSeq platform
Source: Gut Pathog. 2017 Nov 21;9:68. doi: 10.1186/s13099-017-0218-5 (PMC5697093; doi:10.1186/s13099-017-0218-5)
Supplement: Supplementary file 3 — Additional file 3. The raw data of PCO vectors for all samples. [file 13099_2017_218_MOESM3_ESM.xlsx]

## Sheet: Sheet0
Sample name
