# Supplementary material for: Differences in the gut microbiota of dogs (Canis lupus familiaris) fed a natural diet or a commercial feed revealed by the Illumina MiSeq platform
Source: Gut Pathog. 2017 Nov 21;9:68. doi: 10.1186/s13099-017-0218-5 (PMC5697093; doi:10.1186/s13099-017-0218-5)
Supplement: Supplementary file 4 — Additional file 4. The raw data of taxonomic composition at the phylum, family, and species level for all samples. [file 13099_2017_218_MOESM4_ESM.xlsx]

## Sheet: Sheet1
Rank	Taxonomy	Name	ND-1	ND-2	ND-3	ND-4	ND-5	ND-6	CF-1	CF-2	CF-3	CF-4	CF-5	SUM (Ratio)	ND-1	ND-2	ND-3	ND-4	ND-5	ND-6	CF-1	CF-2	CF-3	CF-4	CF-5	Sum (Number)
Phylum	Bacteria;;;Firmicutes	Firmicutes	76.8142	75.3521	41.8425	83.3591	81.5094	26.1301	94.4323	99.3803	37.8633	95.6029	39.3898	751.676	11887	11021	5473	12418	12528	3688	15621	18441	5954	16111	6404	119546
	Bacteria;;;Bacteroidetes	Bacteroidetes	9.83522	0.10939	23.9679	5.96093	13.4027	66.0337	1.91633	0.3934	41.3545	0.34417	42.6129	205.931	1522	16	3135	888	2060	9320	317	73	6503	58	6928	30820
	Bacteria;;;Fusobacteria	Fusobacteria	12.9822	24.0325	29.8624	6.46439	0.60507	7.53153	0	0.05389	0.01272	0	0.03075	81.5755	2009	3515	3906	963	93	1063	0	10	2	0	5	11566
	Bacteria;;;Proteobacteria	Proteobacteria	0.33603	0.4786	1.84251	1.03377	1.21666	0.26924	0.63475	0.05389	20.7377	4.0292	17.9173	48.5497	52	70	241	154	187	38	105	10	3261	679	2913	7710
	Bacteria;;;Actinobacteria	Actinobacteria	0.03231	0.02735	2.47706	3.18185	3.2596	0.03543	3.01052	0.11856	0.02544	0.02374	0.04921	12.2411	5	4	324	474	501	5	498	22	4	4	8	1849
	Bacteria;;;Verrucomicrobia	Verrucomicrobia	0	0	0	0	0	0	0.00605	0	0.00636	0	0	0.01241	0	0	0	0	0	0	1	0	1	0	0	2
	Bacteria;;;Cyanobacteria	Cyanobacteria	0	0	0	0	0.00651	0	0	0	0	0	0	0.00651	0	0	0	0	1	0	0	0	0	0	0	1
	Bacteria;;;EU491194_p	EU491194_p	0	0	0.00765	0	0	0	0	0	0	0	0	0.00765	0	0	1	0	0	0	0	0	0	0	0	1
Family	Bacteria;;;Firmicutes;;Clostridia;;Clostridiales;;Lachnospiraceae	Lachnospiraceae	14.0743	25.694	25.7951	37.182	66.2069	22.545	39.9891	81.7579	12.2099	77.4745	18.7723	421.701	2178	3758	3374	5539	10176	3182	6615	15171	1920	13056	3052	68021
	Bacteria;;;Bacteroidetes;;Bacteroidia;;Bacteroidales;;Bacteroidaceae	Bacteroidaceae	9.78998	0.09572	10.6499	5.86695	13.3832	65.7361	1.89215	0.38263	41.2464	0.3323	38.6087	187.984	1515	14	1393	874	2057	9278	313	71	6486	56	6277	28334
	Bacteria;;;Firmicutes;;Clostridia;;Clostridiales;;Clostridiaceae	Clostridiaceae	50.8821	34.172	0.71865	0.34906	10.2993	0.27632	1.66848	10.9776	2.06677	7.10895	1.00258	119.522	7874	4998	94	52	1583	39	276	2037	325	1198	163	18639
	Bacteria;;;Fusobacteria;;Fusobacteria_c;;Fusobacteriales;;Fusobacteriaceae	Fusobacteriaceae	12.9822	23.9984	29.7859	6.45096	0.60507	7.50319	0	0.05389	0.01272	0	0.03075	81.4231	2009	3510	3896	961	93	1059	0	10	2	0	5	11545
	Bacteria;;;Firmicutes;;Clostridia;;Clostridiales;;Peptostreptococcaceae	Peptostreptococcaceae	9.19548	3.10406	10.7951	20.6216	1.35329	0.66601	1.22718	0.02695	1.17011	1.71493	8.66035	58.5351	1423	454	1412	3072	208	94	203	5	184	289	1408	8752
	Bacteria;;;Firmicutes;;Bacilli;;Lactobacillales;;Lactobacillaceae	Lactobacillaceae	0	0.00684	0.00765	0	0.00651	0	43.7976	0.03233	0	0	0	43.8509	0	1	1	0	1	0	7245	6	0	0	0	7254
	Bacteria;;;Proteobacteria;;Gammaproteobacteria;;Enterobacteriales;;Enterobacteriaceae	Enterobacteriaceae	0.30372	0.43074	0.01529	0.87266	0.3123	0.15587	0.56221	0.01617	20.7059	4.00546	16.7179	44.0982	47	63	2	130	48	22	93	3	3256	675	2718	7057
	Bacteria;;;Firmicutes;;Negativicutes;;Selenomonadales;;Veillonellaceae	Veillonellaceae	0.00646	0.02735	3.36391	22.5012	0.15615	0.98484	5.07798	0.02156	0.00636	0	0.0123	32.1581	1	4	440	3352	24	139	840	4	1	0	2	4807
	Bacteria;;;Firmicutes;;Bacilli;;Lactobacillales;;Streptococcaceae	Streptococcaceae	1.73829	10.8574	0.00765	0.34906	1.63305	0	0.05441	0.02695	16.2607	0.00593	0	30.9335	269	1588	1	52	251	0	9	5	2557	1	0	4733
	Bacteria;;;Firmicutes;;Erysipelotrichi;;Erysipelotrichales;;Allobaculum_f	Allobaculum_f	0.5105	0.4786	0.13761	0.44304	1.16461	0.31883	1.39645	4.71007	5.14467	0.43318	2.51568	17.2532	79	70	18	66	179	45	231	874	809	73	409	2853
	Bacteria;;;Firmicutes;;Bacilli;;Lactobacillales;;Enterococcaceae	Enterococcaceae	0.1874	0.58116	0.00765	1.40968	0.03904	0.00709	0.22972	0.00539	0	4.9015	6.46451	13.8331	29	85	1	210	6	1	38	1	0	826	1051	2248
	Bacteria;;;Bacteroidetes;;Bacteroidia;;Bacteroidales;;Prevotellaceae	Prevotellaceae	0.03231	0	13.211	0.04028	0.00651	0.13462	0.01814	0	0.0318	0.00593	0.01845	13.4991	5	0	1728	6	1	19	3	0	5	1	3	1771
	Bacteria;;;Firmicutes;;Erysipelotrichi;;Erysipelotrichales;;Coprobacillus_f	Coprobacillus_f	0.0517	0.11623	0.02294	0.13426	0.3188	0.03543	0.74356	1.45505	0.55326	3.85711	1.75298	9.04132	8	17	3	20	49	5	123	270	87	650	285	1517
	Bacteria;;;Actinobacteria;;Coriobacteriia;;Coriobacteriales;;Coriobacteriaceae	Coriobacteriaceae	0.01292	0	2.42355	3.11472	3.21405	0.00709	0.04836	0.00539	0.01908	0	0.00615	8.85131	2	0	317	464	494	1	8	1	3	0	1	1291
	Bacteria;;;Bacteroidetes;;Bacteroidia;;Bacteroidales;;Porphyromonadaceae	Porphyromonadaceae	0.00646	0.00684	0.00765	0	0	0.10628	0.00605	0	0.00636	0.00593	3.95498	4.10055	1	1	1	0	0	15	1	0	1	1	643	664
	Bacteria;;;Actinobacteria;;Actinobacteria_c;;Bifidobacteriales;;Bifidobacteriaceae	Bifidobacteriaceae	0.01292	0.02735	0.02294	0.00671	0.01952	0.01417	2.92589	0.01078	0	0.00593	0.00615	3.05236	2	4	3	1	3	2	484	2	0	1	1	503
	Bacteria;;;Proteobacteria;;Betaproteobacteria;;Burkholderiales;;Sutterella_f	Sutterella_f	0	0	0.75688	0.01343	0.89785	0.07794	0.02418	0.00539	0.00636	0	1.17481	2.95684	0	0	99	2	138	11	4	1	1	0	191	447
	Bacteria;;;Firmicutes;;Clostridia;;Clostridiales;;Ruminococcaceae	Ruminococcaceae	0.03231	0.15042	0.36697	0.13426	0.22772	0.88565	0.02418	0.02156	0.07631	0.0356	0.13532	2.0903	5	22	48	20	35	125	4	4	12	6	22	303
	Bacteria;;;Proteobacteria;;Gammaproteobacteria;;Aeromonadales;;Succinivibrionaceae	Succinivibrionaceae	0	0	1.0474	0.00671	0	0	0	0	0	0	0	1.05411	0	0	137	1	0	0	0	0	0	0	0	138
	Bacteria;;;Firmicutes;;Negativicutes;;Selenomonadales;;Acidaminococcaceae	Acidaminococcaceae	0	0	0.30581	0	0	0.30466	0	0	0.00636	0	0	0.61683	0	0	40	0	0	43	0	0	1	0	0	84
	Bacteria;;;Firmicutes;;Clostridia;;Clostridiales;;Clostridium_g7_f	Clostridium_g7_f	0	0	0	0	0	0	0	0.26407	0.19078	0	0	0.45485	0	0	0	0	0	0	0	49	30	0	0	79
	Bacteria;;;Firmicutes;;Clostridia;;Clostridiales;;Clostridiales_uc	Clostridiales_uc	0.0517	0.04786	0.12997	0.06713	0.03904	0.06377	0.02418	0.00539	0.0318	0.02374	0.0123	0.49688	8	7	17	10	6	9	4	1	5	4	2	73
	Bacteria;;;Bacteroidetes;;Bacteroidia;;Bacteroidales;;Bacteroidales_uc	Bacteroidales_uc	0.00646	0	0.06116	0.04699	0.01301	0.0496	0	0.01078	0.05087	0	0.03075	0.26962	1	0	8	7	2	7	0	2	8	0	5	40
	Bacteria;;;Proteobacteria;;Epsilonproteobacteria;;Campylobacterales;;Campylobacteraceae	Campylobacteraceae	0	0	0	0.12754	0.00651	0.03543	0	0	0	0	0	0.16948	0	0	0	19	1	5	0	0	0	0	0	25
	Bacteria;;;Actinobacteria;;Actinobacteria_c;;Actinomycetales;;Actinomycetaceae	Actinomycetaceae	0	0	0.00765	0.00671	0.01952	0.00709	0.03023	0.05928	0	0.01187	0.00615	0.1485	0	0	1	1	3	1	5	11	0	2	1	25
	Bacteria;;;Firmicutes;;Erysipelotrichi;;Turicibacter_o;;Turicibacter_f	Turicibacter_f	0.00646	0	0.01529	0.00671	0.01301	0.03543	0.05441	0	0.01908	0.01187	0	0.16226	1	0	2	1	2	5	9	0	3	2	0	25
	Bacteria;;;Firmicutes;;Bacilli;;Lactobacillales;;Lactobacillales_uc	Lactobacillales_uc	0	0.02735	0.00765	0.00671	0	0	0.06045	0	0.02544	0.01187	0.00615	0.14562	0	4	1	1	0	0	10	0	4	2	1	23
	Bacteria;;;Firmicutes;;Negativicutes;;Selenomonadales;;Selenomonadales_uc	Selenomonadales_uc	0	0	0.02294	0.06041	0	0	0.02418	0	0.01272	0	0	0.12025	0	0	3	9	0	0	4	0	2	0	0	18
	Bacteria;;;Firmicutes;;Clostridia;;Clostridia_uc;;Clostridia_uc_f	Clostridia_uc_f	0.01292	0.00684	0.02294	0.01343	0.01301	0	0.00605	0.01078	0.01272	0.00593	0.00615	0.11077	2	1	3	2	2	0	1	2	2	1	1	17
	Bacteria;;;Fusobacteria;;Fusobacteria_c;;Fusobacteriales;;Fusobacteriales_uc	Fusobacteriales_uc	0	0.02051	0.05352	0.01343	0	0.02834	0	0	0	0	0	0.1158	0	3	7	2	0	4	0	0	0	0	0	16
	Bacteria;;;Firmicutes;;Bacilli;;Bacillales;;Staphylococcaceae	Staphylococcaceae	0.00646	0.01367	0	0	0.01301	0	0	0.04311	0.00636	0	0.00615	0.08876	1	2	0	0	2	0	0	8	1	0	1	15
	Bacteria;;;Actinobacteria;;Actinobacteria_c;;Micrococcales;;Microbacteriaceae	Microbacteriaceae	0	0	0	0.01343	0.00651	0	0	0.02156	0	0.00593	0.03075	0.07818	0	0	0	2	1	0	0	4	0	1	5	13
	Bacteria;;;Firmicutes;;Bacilli;;Lactobacillales;;Carnobacteriaceae	Carnobacteriaceae	0	0	0.0841	0	0	0	0	0	0	0	0	0.0841	0	0	11	0	0	0	0	0	0	0	0	11
	Bacteria;;;Proteobacteria;;Epsilonproteobacteria;;Campylobacterales;;Helicobacteraceae	Helicobacteraceae	0.03231	0.03419	0	0	0	0	0	0	0	0	0	0.0665	5	5	0	0	0	0	0	0	0	0	0	10
	Bacteria;;;Firmicutes;;Clostridia;;Clostridiales;;Epulopiscium_f	Epulopiscium_f	0.03231	0.03419	0	0	0	0	0	0	0	0	0	0.0665	5	5	0	0	0	0	0	0	0	0	0	10
	Bacteria;;;Firmicutes;;Bacilli;;Lactobacillales;;Aerococcaceae	Aerococcaceae	0	0.00684	0	0.00671	0.00651	0	0.00605	0	0.02544	0	0.00615	0.0577	0	1	0	1	1	0	1	0	4	0	1	9
	Bacteria;;;Firmicutes;;Erysipelotrichi;;Erysipelotrichales;;Erysipelotrichales_uc	Erysipelotrichales_uc	0	0	0	0	0.00651	0	0.00605	0.01617	0.00636	0	0.0123	0.04739	0	0	0	0	1	0	1	3	1	0	2	8
	Bacteria;;;Proteobacteria;;Gammaproteobacteria;;Enterobacteriales;;Enterobacteriales_uc	Enterobacteriales_uc	0	0.00684	0	0.00671	0	0	0	0	0.01272	0.01187	0.0123	0.05044	0	1	0	1	0	0	0	0	2	2	2	8
	Bacteria;;;Proteobacteria;;Betaproteobacteria;;Neisseriales;;Neisseriaceae	Neisseriaceae	0	0	0	0	0	0	0.02418	0	0.01272	0.00593	0	0.04283	0	0	0	0	0	0	4	0	2	1	0	7
	Bacteria;;;Actinobacteria;;Coriobacteriia;;Coriobacteriales;;Coriobacteriales_uc	Coriobacteriales_uc	0	0	0.01529	0.02685	0	0	0	0	0	0	0	0.04214	0	0	2	4	0	0	0	0	0	0	0	6
	Bacteria;;;Bacteroidetes;;Bacteroidia;;Bacteroidia_uc;;Bacteroidia_uc_f	Bacteroidia_uc_f	0	0	0.00765	0.00671	0	0.00709	0	0	0.01908	0	0	0.04053	0	0	1	1	0	1	0	0	3	0	0	6
	Bacteria;;;Fusobacteria;;Fusobacteria_c;;Fusobacteria_c_uc;;Fusobacteria_c_uc_f	Fusobacteria_c_uc_f	0	0.01367	0.02294	0	0	0	0	0	0	0	0	0.03661	0	2	3	0	0	0	0	0	0	0	0	5
	Bacteria;;;Firmicutes;;Bacilli;;Gemella_o;;Gemella_f	Gemella_f	0.00646	0	0.00765	0	0.00651	0	0.00605	0	0.00636	0	0	0.03303	1	0	1	0	1	0	1	0	1	0	0	5
	Bacteria;;;Actinobacteria;;Actinobacteria_c;;Corynebacteriales;;Corynebacteriaceae	Corynebacteriaceae	0	0	0.00765	0.01343	0	0	0	0.00539	0.00636	0	0	0.03283	0	0	1	2	0	0	0	1	1	0	0	5
	Bacteria;;;Proteobacteria;;Betaproteobacteria;;Burkholderiales;;Ralstonia_f	Ralstonia_f	0	0.00684	0	0	0	0	0.00605	0.01078	0	0	0.00615	0.02982	0	1	0	0	0	0	1	2	0	0	1	5
	Bacteria;;;Firmicutes;;Bacilli;;Bacillales;;Bacillales_uc	Bacillales_uc	0	0	0	0.01343	0	0	0.01209	0	0	0	0	0.02552	0	0	0	2	0	0	2	0	0	0	0	4
	Bacteria;;;Firmicutes;;Bacilli;;Bacilli_uc;;Bacilli_uc_f	Bacilli_uc_f	0	0	0	0	0.00651	0	0.00605	0	0.01272	0	0	0.02528	0	0	0	0	1	0	1	0	2	0	0	4
	Bacteria;;;Firmicutes;;Bacilli;;Bacillales;;Bacillaceae	Bacillaceae	0	0.00684	0	0.01343	0	0	0	0	0	0	0.00615	0.02642	0	1	0	2	0	0	0	0	0	0	1	4
	Bacteria;;;Firmicutes;;Clostridia;;Clostridiales;;Mogibacterium_f	Mogibacterium_f	0	0.00684	0	0.00671	0	0	0.01209	0	0	0	0	0.02564	0	1	0	1	0	0	2	0	0	0	0	4
	Bacteria;;;Firmicutes;;Clostridia;;Clostridiales;;Natranaerovirga_f	Natranaerovirga_f	0.00646	0	0	0.01343	0	0	0	0	0	0.00593	0	0.02582	1	0	0	2	0	0	0	0	0	1	0	4
	Bacteria;;;Proteobacteria;;Alphaproteobacteria;;Rhizobiales;;Methylobacteriaceae	Methylobacteriaceae	0	0	0	0	0	0	0	0.01617	0	0	0	0.01617	0	0	0	0	0	0	0	3	0	0	0	3
	Bacteria;;;Firmicutes;;Bacilli;;Lactobacillales;;Leuconostocaceae	Leuconostocaceae	0.00646	0	0	0	0	0	0	0	0	0	0.0123	0.01876	1	0	0	0	0	0	0	0	0	0	2	3
	Bacteria;;;Proteobacteria;;Deltaproteobacteria;;Desulfovibrionales;;Desulfovibrionaceae	Desulfovibrionaceae	0	0	0	0.00671	0	0	0.01209	0	0	0	0	0.0188	0	0	0	1	0	0	2	0	0	0	0	3
	Bacteria;;;Firmicutes;;Bacilli;;Bacillales;;Listeriaceae	Listeriaceae	0	0	0	0.02014	0	0	0	0	0	0	0	0.02014	0	0	0	3	0	0	0	0	0	0	0	3
	Bacteria;;;Actinobacteria;;Actinobacteria_c;;Propionibacteriales;;Propionibacteriaceae	Propionibacteriaceae	0.00646	0	0	0	0	0	0	0.01078	0	0	0	0.01724	1	0	0	0	0	0	0	2	0	0	0	3
	Bacteria;;;Firmicutes;;Clostridia;;Clostridiales;;Thermohalobacter_f	Thermohalobacter_f	0.00646	0	0	0	0	0	0	0.00539	0	0	0	0.01185	1	0	0	0	0	0	0	1	0	0	0	2
	Bacteria;;;Firmicutes;;Firmicutes_uc;;Firmicutes_uc_o;;Firmicutes_uc_f	Firmicutes_uc_f	0	0	0.00765	0	0	0	0	0	0.00636	0	0	0.01401	0	0	1	0	0	0	0	0	1	0	0	2
	Bacteria;;;Proteobacteria;;Betaproteobacteria;;Burkholderiales;;Burkholderiales_uc	Burkholderiales_uc	0	0	0.01529	0	0	0	0	0	0	0	0	0.01529	0	0	2	0	0	0	0	0	0	0	0	2
	Bacteria;;;Verrucomicrobia;;Verrucomicrobiae;;Verrucomicrobiales;;Akkermansia_f	Akkermansia_f	0	0	0	0	0	0	0.00605	0	0.00636	0	0	0.01241	0	0	0	0	0	0	1	0	1	0	0	2
	Bacteria;;;Firmicutes;;Negativicutes;;Negativicutes_uc;;Negativicutes_uc_f	Negativicutes_uc_f	0	0	0.00765	0	0	0	0	0	0.00636	0	0	0.01401	0	0	1	0	0	0	0	0	1	0	0	2
	Bacteria;;;Firmicutes;;Clostridia;;Clostridiales;;Anaerovirgula_f	Anaerovirgula_f	0	0.00684	0	0.00671	0	0	0	0	0	0	0	0.01355	0	1	0	1	0	0	0	0	0	0	0	2
	Bacteria;;;Firmicutes;;Bacilli;;Bacillales;;Planococcaceae	Planococcaceae	0	0	0	0	0	0	0	0	0	0.01187	0	0.01187	0	0	0	0	0	0	0	0	0	2	0	2
	Bacteria;;;Bacteroidetes;;Bacteroidia;;Bacteroidales;;Rikenellaceae	Rikenellaceae	0	0	0.01529	0	0	0	0	0	0	0	0	0.01529	0	0	2	0	0	0	0	0	0	0	0	2
	Bacteria;;;Firmicutes;;Erysipelotrichi;;Erysipelotrichi_uc;;Erysipelotrichi_uc_f	Erysipelotrichi_uc_f	0	0	0.00765	0	0	0	0	0	0.00636	0	0	0.01401	0	0	1	0	0	0	0	0	1	0	0	2
	Bacteria;;;Cyanobacteria;;JF737898_c;;JF417809_o;;JF417809_f	JF417809_f	0	0	0	0	0.00651	0	0	0	0	0	0	0.00651	0	0	0	0	1	0	0	0	0	0	0	1
	Bacteria;;;Bacteroidetes;;Bacteroidia;;Bacteroidales;;Odoribacter_f	Odoribacter_f	0	0	0.00765	0	0	0	0	0	0	0	0	0.00765	0	0	1	0	0	0	0	0	0	0	0	1
	Bacteria;;;Proteobacteria;;Alphaproteobacteria;;Sphingomonadales;;Sphingomonadaceae	Sphingomonadaceae	0	0	0	0	0	0	0	0	0	0	0.00615	0.00615	0	0	0	0	0	0	0	0	0	0	1	1
	Bacteria;;;Actinobacteria;;Actinobacteria_c;;Actinobacteria_c_uc;;Actinobacteria_c_uc_f	Actinobacteria_c_uc_f	0	0	0	0	0	0.00709	0	0	0	0	0	0.00709	0	0	0	0	0	1	0	0	0	0	0	1
	Bacteria;;;Proteobacteria;;Gammaproteobacteria;;Chromatiales;;Chromatiales_uc	Chromatiales_uc	0	0	0	0	0	0	0	0.00539	0	0	0	0.00539	0	0	0	0	0	0	0	1	0	0	0	1
	Bacteria;;;Firmicutes;;Clostridia;;Clostridiales;;Acidaminobacter_f	Acidaminobacter_f	0	0	0	0	0	0	0	0	0	0	0.00615	0.00615	0	0	0	0	0	0	0	0	0	0	1	1
	Bacteria;;;Bacteroidetes;;Bacteroidetes_uc;;Bacteroidetes_uc_o;;Bacteroidetes_uc_f	Bacteroidetes_uc_f	0	0	0.00765	0	0	0	0	0	0	0	0	0.00765	0	0	1	0	0	0	0	0	0	0	0	1
	Bacteria;;;Firmicutes;;Clostridia;;Clostridiales;;Clostridium_g8_f	Clostridium_g8_f	0	0	0	0	0	0.00709	0	0	0	0	0	0.00709	0	0	0	0	0	1	0	0	0	0	0	1
	Bacteria;;;Actinobacteria;;Actinobacteria_c;;Bifidobacteriales;;Bifidobacteriales_uc	Bifidobacteriales_uc	0	0	0	0	0	0	0.00605	0	0	0	0	0.00605	0	0	0	0	0	0	1	0	0	0	0	1
	Bacteria;;;Actinobacteria;;Actinobacteria_c;;Corynebacteriales;;Corynebacteriales_uc	Corynebacteriales_uc	0	0	0	0	0	0	0	0.00539	0	0	0	0.00539	0	0	0	0	0	0	0	1	0	0	0	1
	Bacteria;;;Firmicutes;;Clostridia;;Clostridiales;;Eubacteriaceae	Eubacteriaceae	0	0.00684	0	0	0	0	0	0	0	0	0	0.00684	0	1	0	0	0	0	0	0	0	0	0	1
	Bacteria;;;Proteobacteria;;Gammaproteobacteria;;Aeromonadales;;Aeromonadales_uc	Aeromonadales_uc	0	0	0.00765	0	0	0	0	0	0	0	0	0.00765	0	0	1	0	0	0	0	0	0	0	0	1
	Bacteria;;;Firmicutes;;Clostridia;;Clostridiales;;Helcococcus_f	Helcococcus_f	0	0	0	0	0	0	0.00605	0	0	0	0	0.00605	0	0	0	0	0	0	1	0	0	0	0	1
	Bacteria;;;Proteobacteria;;Gammaproteobacteria;;Pasteurellales;;Pasteurellaceae	Pasteurellaceae	0	0	0	0	0	0	0.00605	0	0	0	0	0.00605	0	0	0	0	0	0	1	0	0	0	0	1
	Bacteria;;;EU491194_p;;EU491194_c;;EU491194_o;;EU491194_f	EU491194_f	0	0	0.00765	0	0	0	0	0	0	0	0	0.00765	0	0	1	0	0	0	0	0	0	0	0	1
	Bacteria;;;Proteobacteria;;Gammaproteobacteria;;Gammaproteobacteria_uc;;Gammaproteobacteria_uc_f	Gammaproteobacteria_uc_f	0	0	0	0	0	0	0	0	0	0.00593	0	0.00593	0	0	0	0	0	0	0	0	0	1	0	1
	Bacteria;;;Bacteroidetes;;Bacteroidia;;Bacteroidales;;EF602759_f	EF602759_f	0	0.00684	0	0	0	0	0	0	0	0	0	0.00684	0	1	0	0	0	0	0	0	0	0	0	1
Species	Bacteria;;;Firmicutes;;Clostridia;;Clostridiales;;Lachnospiraceae;;Ruminococcus_g6;Ruminococcus gnavus	Ruminococcus gnavus	1.51858	8.22508	1.15443	3.11472	7.27391	6.31288	27.3546	11.5812	0	37.0342	16.4842	120.054	235	1203	151	464	1118	891	4525	2149	0	6241	2680	19657
	Bacteria;;;Bacteroidetes;;Bacteroidia;;Bacteroidales;;Bacteroidaceae;;Bacteroides;Bacteroides vulgatus	Bacteroides vulgatus	6.62359	0	0.57339	0.08055	1.91932	2.68528	1.16068	0.29101	34.2703	0.24329	5.03752	52.8849	1025	0	75	12	295	379	192	54	5389	41	819	8281
	Bacteria;;;Firmicutes;;Clostridia;;Clostridiales;;Clostridiaceae;;Clostridium;Clostridium perfringens	Clostridium perfringens	32.1357	11.3975	0.51223	0.23495	9.08913	0.02834	0	0	0.05087	0	0.06766	53.5164	4973	1667	67	35	1397	4	0	0	8	0	11	8162
	Bacteria;;;Firmicutes;;Clostridia;;Clostridiales;;Lachnospiraceae;;Blautia;FJ370531_s	FJ370531_s	0	0	1.26911	3.02746	0.48146	4.50616	0	32.4855	0	0	0.0123	41.7819	0	0	166	451	74	636	0	6028	0	0	2	7357
	Bacteria;;;Fusobacteria;;Fusobacteria_c;;Fusobacteriales;;Fusobacteriaceae;;Fusobacterium;Clostridium rectum	Clostridium rectum	9.42811	17.9475	8.51682	4.5781	0.57254	6.88678	0	0.0485	0.00636	0	0.00615	47.9909	1459	2625	1114	682	88	972	0	9	1	0	1	6951
	Bacteria;;;Firmicutes;;Clostridia;;Clostridiales;;Lachnospiraceae;;Blautia;GQ493555_s	GQ493555_s	0	0.00684	0	0	0.00651	0.00709	0.01209	11.2201	6.89984	18.0691	0.00615	36.2277	0	1	0	0	1	1	2	2082	1085	3045	1	6218
	Bacteria;;;Proteobacteria;;Gammaproteobacteria;;Enterobacteriales;;Enterobacteriaceae;;Escherichia;Escherichia coli group	Escherichia coli group	0.20679	0.34869	0.00765	0.77197	0.24073	0.1417	0.47757	0.01617	18.0604	3.59008	14.3745	38.2362	32	51	1	115	37	20	79	3	2840	605	2337	6120
	Bacteria;;;Firmicutes;;Clostridia;;Clostridiales;;Lachnospiraceae;;Blautia;EU465331_s	EU465331_s	2.48142	3.89033	4.70183	8.31711	15.1594	0.01417	0	1.75146	0	0.00593	0.0123	36.334	384	569	615	1239	2330	2	0	325	0	1	2	5467
	Bacteria;;;Firmicutes;;Bacilli;;Lactobacillales;;Lactobacillaceae;;Lactobacillus;Lactobacillus johnsonii	Lactobacillus johnsonii	0	0	0	0	0	0	30.5767	0.00539	0	0	0	30.5821	0	0	0	0	0	0	5058	1	0	0	0	5059
	Bacteria;;;Firmicutes;;Clostridia;;Clostridiales;;Lachnospiraceae;;Dorea;ADLB_s	ADLB_s	1.32472	3.19978	2.05657	5.8938	15.4522	5.61145	0	0.01078	0	0	0.00615	33.5554	205	468	269	878	2375	792	0	2	0	0	1	4990
	Bacteria;;;Bacteroidetes;;Bacteroidia;;Bacteroidales;;Bacteroidaceae;;Bacteroides;Bacteroides_uc	Bacteroides_uc	1.40872	0.02735	2.5	0.77197	1.75016	14.1916	0.21763	0.04311	5.15103	0.07714	5.94784	32.0865	218	4	327	115	269	2003	36	8	810	13	967	4770
	Bacteria;;;Firmicutes;;Clostridia;;Clostridiales;;Lachnospiraceae;;Dorea;GL872355_s	GL872355_s	1.7706	3.13141	2.16361	3.67859	4.29408	0.87856	7.52025	3.27657	1.80604	0.00593	0.0123	28.5379	274	458	283	548	660	124	1244	608	284	1	2	4486
	Bacteria;;;Firmicutes;;Bacilli;;Lactobacillales;;Streptococcaceae;;Streptococcus;Streptococcus equinus group	Streptococcus equinus group	0.12278	8.60112	0.00765	0.02014	0.05856	0	0.00605	0	13.965	0	0	22.7813	19	1258	1	3	9	0	1	0	2196	0	0	3487
	Bacteria;;;Firmicutes;;Clostridia;;Clostridiales;;Peptostreptococcaceae;;Clostridium_g4;Clostridium hiranonis	Clostridium hiranonis	0.01292	0.01367	9.14373	12.9422	0.01952	0.01417	0	0	0	0	0	22.1462	2	2	1196	1928	3	2	0	0	0	0	0	3133
	Bacteria;;;Firmicutes;;Clostridia;;Clostridiales;;Clostridiaceae;;Clostridium;GQ179695_s	GQ179695_s	0	0.27349	0	0.02014	0	0	0.63475	9.77042	0.75676	5.50676	0.00615	16.9685	0	40	0	3	0	0	105	1813	119	928	1	3009
	Bacteria;;;Bacteroidetes;;Bacteroidia;;Bacteroidales;;Bacteroidaceae;;Bacteroides;Bacteroides massiliensis	Bacteroides massiliensis	0	0	0	0	0	19.6755	0.00605	0	0	0	0	19.6816	0	0	0	0	0	2777	1	0	0	0	0	2778
	Bacteria;;;Firmicutes;;Negativicutes;;Selenomonadales;;Veillonellaceae;;Megamonas;Megamonas funiformis	Megamonas funiformis	0	0	0.74159	11.6668	0.11711	0.70143	4.04425	0.01078	0	0	0	17.2819	0	0	97	1738	18	99	669	2	0	0	0	2623
	Bacteria;;;Firmicutes;;Clostridia;;Clostridiales;;Lachnospiraceae;;Blautia;EF403475_s	EF403475_s	0.45234	0.52646	6.78135	2.0541	8.11971	0.00709	0	0	0	0.00593	0	17.947	70	77	887	306	1248	1	0	0	0	1	0	2590
	Bacteria;;;Firmicutes;;Clostridia;;Clostridiales;;Lachnospiraceae;;Blautia;Blautia_uc	Blautia_uc	0.31018	0.59483	1.72783	1.3694	3.02537	0.67309	0	4.04721	0.73132	2.42701	0.00615	14.9124	48	87	226	204	465	95	0	751	115	409	1	2401
	Bacteria;;;Firmicutes;;Clostridia;;Clostridiales;;Lachnospiraceae;;Blautia;DQ795137_s	DQ795137_s	0.00646	0.00684	0.06116	0.01343	0.01301	0.00709	0.00605	5.5346	0.94754	5.95775	0	12.5539	1	1	8	2	2	1	1	1027	149	1004	0	2196
	Bacteria;;;Bacteroidetes;;Bacteroidia;;Bacteroidales;;Bacteroidaceae;;Bacteroides;Bacteroides dorei	Bacteroides dorei	0.03877	0	0.37462	0	0.13012	1.72169	0.04232	0.00539	0.31161	0	10.9361	13.5607	6	0	49	0	20	243	7	1	49	0	1778	2153
	Bacteria;;;Firmicutes;;Clostridia;;Clostridiales;;Clostridiaceae;;Clostridium;AVSV_s	AVSV_s	7.15994	6.99439	0	0	0.00651	0	0	0.01078	0.01272	0.0178	0	14.2021	1108	1023	0	0	1	0	0	2	2	3	0	2139
	Bacteria;;;Bacteroidetes;;Bacteroidia;;Bacteroidales;;Bacteroidaceae;;Bacteroides;Bacteroides plebeius	Bacteroides plebeius	0	0	0.12232	0.00671	0	11.0033	0.41107	0	0	0	2.99545	14.5388	0	0	16	1	0	1553	68	0	0	0	487	2125
	Bacteria;;;Firmicutes;;Clostridia;;Clostridiales;;Lachnospiraceae;;Lachnospiraceae_uc;Lachnospiraceae_uc_s	Lachnospiraceae_uc_s	0.80775	1.13497	1.34557	1.38283	1.75667	0.87148	0.70729	1.385	0.47059	1.89888	0.34445	12.1055	125	166	176	206	270	123	117	257	74	320	56	1890
	Bacteria;;;Firmicutes;;Clostridia;;Clostridiales;;Clostridiaceae;;Clostridium;Clostridium_uc	Clostridium_uc	4.55574	4.7313	0.0841	0.02685	0.8393	0.03543	0.16927	0.74908	0.18442	0.54	0.07996	11.9954	705	692	11	4	129	5	28	139	29	91	13	1846
	Bacteria;;;Firmicutes;;Bacilli;;Lactobacillales;;Enterococcaceae;;Enterococcus;Enterococcus hirae	Enterococcus hirae	0.12924	0.4239	0	0	0	0	0.20554	0	0	4.27842	5.72641	10.7635	20	62	0	0	0	0	34	0	0	721	931	1768
	Bacteria;;;Firmicutes;;Bacilli;;Lactobacillales;;Lactobacillaceae;;Lactobacillus;Lactobacillus_uc	Lactobacillus_uc	0	0	0	0	0	0	10.5489	0.00539	0	0	0	10.5543	0	0	0	0	0	0	1745	1	0	0	0	1746
	Bacteria;;;Bacteroidetes;;Bacteroidia;;Bacteroidales;;Bacteroidaceae;;Bacteroidaceae_uc;Bacteroidaceae_uc_s	Bacteroidaceae_uc_s	0.49758	0.01367	1.49847	0.16782	0.65062	5.158	0.04836	0.03233	1.51351	0.01187	1.74068	11.3329	77	2	196	25	100	728	8	6	238	2	283	1665
	Bacteria;;;Firmicutes;;Clostridia;;Clostridiales;;Lachnospiraceae;;Ruminococcus_g6;Ruminococcus_g6_uc	Ruminococcus_g6_uc	0.24556	0.86832	0.19113	0.35578	0.93689	0.58098	1.90424	0.94848	0.01272	3.14503	0.81191	10.001	38	127	25	53	144	82	315	176	2	530	132	1624
	Bacteria;;;Firmicutes;;Clostridia;;Clostridiales;;Peptostreptococcaceae;;Clostridium_g4;Clostridium difficile	Clostridium difficile	0.00646	0.00684	0	0	0.07807	0.55264	1.08209	0	0.03816	0.9079	6.99963	9.67179	1	1	0	0	12	78	179	0	6	153	1138	1568
	Bacteria;;;Firmicutes;;Negativicutes;;Selenomonadales;;Veillonellaceae;;Megamonas;Megamonas_uc	Megamonas_uc	0	0.00684	0.54281	8.6259	0.01301	0.2409	0.81006	0	0	0	0	10.2395	0	1	71	1285	2	34	134	0	0	0	0	1527
	Bacteria;;;Firmicutes;;Erysipelotrichi;;Erysipelotrichales;;Allobaculum_f;;Eubacterium_g1;GQ016276_s	GQ016276_s	0.01939	0.08888	0	0.00671	0	0	0.99142	3.63225	4.18442	0	0	8.92307	3	13	0	1	0	0	164	674	658	0	0	1513
	Bacteria;;;Fusobacteria;;Fusobacteria_c;;Fusobacteriales;;Fusobacteriaceae;;Fusobacterium;Fusobacterium_uc	Fusobacterium_uc	1.75767	2.96732	3.99083	0.77197	0.02602	0.43219	0	0	0.00636	0	0.0123	9.96466	272	434	522	115	4	61	0	0	1	0	2	1411
	Bacteria;;;Firmicutes;;Clostridia;;Clostridiales;;Lachnospiraceae;;Dorea;Dorea_uc	Dorea_uc	0.65267	0.99822	0.7263	1.41639	2.32921	0.78645	0.71938	0.31796	0.32432	0.59934	0	8.87024	101	146	95	211	358	111	119	59	51	101	0	1352
	Bacteria;;;Firmicutes;;Clostridia;;Clostridiales;;Peptostreptococcaceae;;Clostridium_g4;Clostridium sordellii	Clostridium sordellii	5.91922	1.97593	0.05352	0.61086	0.03253	0.02834	0	0	0	0	0.0123	8.6327	916	289	7	91	5	4	0	0	0	0	2	1314
	Bacteria;;;Bacteroidetes;;Bacteroidia;;Bacteroidales;;Bacteroidaceae;;Bacteroides;EF403496_s	EF403496_s	0	0	0	0	0.08458	9.05484	0	0	0	0	0	9.13942	0	0	0	0	13	1278	0	0	0	0	0	1291
	Bacteria;;;Bacteroidetes;;Bacteroidia;;Bacteroidales;;Bacteroidaceae;;Bacteroides;DQ798125_s	DQ798125_s	0	0	0	0	0	0	0	0	0	0	6.58138	6.58138	0	0	0	0	0	0	0	0	0	0	1070	1070
	Bacteria;;;Bacteroidetes;;Bacteroidia;;Bacteroidales;;Prevotellaceae;;Alloprevotella;JN559630_s	JN559630_s	0	0	7.92049	0	0	0.02126	0	0	0	0	0	7.94175	0	0	1036	0	0	3	0	0	0	0	0	1039
	Bacteria;;;Firmicutes;;Erysipelotrichi;;Erysipelotrichales;;Coprobacillus_f;;Clostridium_g6;Clostridium ramosum	Clostridium ramosum	0.03231	0.08888	0.02294	0.07384	0.2082	0.02834	0.53198	0.67903	0.3434	2.61097	1.09485	5.71474	5	13	3	11	32	4	88	126	54	440	178	954
	Bacteria;;;Firmicutes;;Clostridia;;Clostridiales;;Lachnospiraceae;;Hungatella;FJ370676_s	FJ370676_s	0.25848	0.25297	0.35933	0.29536	1.59401	0	0	0.74908	0	1.71493	0	5.22416	40	37	47	44	245	0	0	139	0	289	0	841
	Bacteria;;;Firmicutes;;Clostridia;;Clostridiales;;Lachnospiraceae;;Coprococcus_g2;Clostridium nexile	Clostridium nexile	0.89822	0.04786	0	0	0.26025	0	0	1.79457	0.26073	0.78922	0	4.05085	139	7	0	0	40	0	0	333	41	133	0	693
	Bacteria;;;Bacteroidetes;;Bacteroidia;;Bacteroidales;;Bacteroidaceae;;Bacteroides;DQ805629_s	DQ805629_s	0.96284	0	0.06881	0.19467	3.24008	0	0	0	0	0	0.00615	4.47255	149	0	9	29	498	0	0	0	0	0	1	686
	Bacteria;;;Firmicutes;;Clostridia;;Clostridiales;;Lachnospiraceae;;Hungatella;EF401353_s	EF401353_s	0.69144	0.55381	0.38226	0.47661	0.39037	0.5739	1.11232	0	0.00636	0.16022	0	4.34729	107	81	50	71	60	81	184	0	1	27	0	662
	Bacteria;;;Actinobacteria;;Coriobacteriia;;Coriobacteriales;;Coriobacteriaceae;;Collinsella;Collinsella stercoris	Collinsella stercoris	0.01292	0	2.07187	2.57099	0.03253	0	0	0	0	0	0	4.68831	2	0	271	383	5	0	0	0	0	0	0	661
	Bacteria;;;Firmicutes;;Clostridia;;Clostridiales;;Lachnospiraceae;;Blautia;EF399598_s	EF399598_s	0	0.00684	0.04587	0.65785	0.20169	0	0	2.80772	0.00636	0	0	3.72633	0	1	6	98	31	0	0	521	1	0	0	658
	Bacteria;;;Firmicutes;;Clostridia;;Clostridiales;;Clostridiaceae;;Clostridium;Sarcina maxima	Sarcina maxima	0.01292	4.45098	0	0	0	0	0	0	0	0	0	4.4639	2	651	0	0	0	0	0	0	0	0	0	653
	Bacteria;;;Proteobacteria;;Gammaproteobacteria;;Enterobacteriales;;Enterobacteriaceae;;Escherichia;Escherichia_uc	Escherichia_uc	0.05816	0.04786	0.00765	0.08055	0.05856	0.00709	0.06045	0	1.96502	0.29077	1.5008	4.07691	9	7	1	12	9	1	10	0	309	49	244	651
	Bacteria;;;Bacteroidetes;;Bacteroidia;;Bacteroidales;;Bacteroidaceae;;Bacteroides;Bacteroides coprophilus	Bacteroides coprophilus	0	0	0.52752	0	2.94079	0	0	0	0	0	0.76885	4.23716	0	0	69	0	452	0	0	0	0	0	125	646
	Bacteria;;;Firmicutes;;Clostridia;;Clostridiales;;Clostridiaceae;;Clostridium;Clostridium baratii	Clostridium baratii	3.24394	0.88883	0	0.01343	0	0	0	0	0	0	0.0123	4.1585	502	130	0	2	0	0	0	0	0	0	2	636
	Bacteria;;;Firmicutes;;Clostridia;;Clostridiales;;Peptostreptococcaceae;;Clostridium_g4;Eubacterium tenue	Eubacterium tenue	0.10985	0.31451	0.05352	3.66517	0.05856	0.00709	0	0	0	0	0	4.2087	17	46	7	546	9	1	0	0	0	0	0	626
	Bacteria;;;Firmicutes;;Clostridia;;Clostridiales;;Clostridiaceae;;Clostridiaceae_uc;Clostridiaceae_uc_s	Clostridiaceae_uc_s	1.36349	1.40845	0.11468	0.03356	0.3123	0.03543	0.07859	0.22095	0.12719	0.18395	0.04306	3.92165	211	206	15	5	48	5	13	41	20	31	7	602
	Bacteria;;;Bacteroidetes;;Bacteroidia;;Bacteroidales;;Bacteroidaceae;;Bacteroides;EF405084_s	EF405084_s	0	0	0	3.8934	0	0	0	0	0	0	0	3.8934	0	0	0	580	0	0	0	0	0	0	0	580
	Bacteria;;;Bacteroidetes;;Bacteroidia;;Bacteroidales;;Porphyromonadaceae;;Parabacteroides;Parabacteroides merdae	Parabacteroides merdae	0	0	0	0	0	0.05668	0	0	0	0	3.49366	3.55034	0	0	0	0	0	8	0	0	0	0	568	576
	Bacteria;;;Fusobacteria;;Fusobacteria_c;;Fusobacteriales;;Fusobacteriaceae;;Fusobacterium;Fusobacterium perfoetens	Fusobacterium perfoetens	0	0	4.25076	0.01343	0	0.00709	0	0	0	0	0	4.27128	0	0	556	2	0	1	0	0	0	0	0	559
	Bacteria;;;Fusobacteria;;Fusobacteria_c;;Fusobacteriales;;Fusobacteriaceae;;Fusobacterium;Fusobacterium varium	Fusobacterium varium	0.81422	1.17599	1.44495	0.45647	0	0.02126	0	0	0	0	0.00615	3.91904	126	172	189	68	0	3	0	0	0	0	1	559
	Bacteria;;;Firmicutes;;Clostridia;;Clostridiales;;Clostridiaceae;;Clostridium;Clostridium paraputrificum	Clostridium paraputrificum	0.14216	0.60167	0	0.00671	0	0.15587	0.77379	0.08084	0.32432	0.81296	0.53512	3.43344	22	88	0	1	0	22	128	15	51	137	87	551
	Bacteria;;;Firmicutes;;Clostridia;;Clostridiales;;Peptostreptococcaceae;;Clostridium_g4;Clostridium_g4_uc	Clostridium_g4_uc	0.56866	0.2393	0.8104	1.35598	0.01952	0.02834	0.05441	0.00539	0.00636	0.09494	0.51667	3.69997	88	35	106	202	3	4	9	1	1	16	84	549
	Bacteria;;;Fusobacteria;;Fusobacteria_c;;Fusobacteriales;;Fusobacteriaceae;;Fusobacterium;EU772717_s	EU772717_s	0.12278	0.34186	3.49388	0.06713	0	0	0	0	0	0	0.00615	4.0318	19	50	457	10	0	0	0	0	0	0	1	537
	Bacteria;;;Firmicutes;;Erysipelotrichi;;Erysipelotrichales;;Allobaculum_f;;Eubacterium_g1;JH590969_s	JH590969_s	0	0	0	0	0	0.22673	0.21763	0.12934	0.02544	0.35011	2.06667	3.01592	0	0	0	0	0	32	36	24	4	59	336	491
	Bacteria;;;Fusobacteria;;Fusobacteria_c;;Fusobacteriales;;Fusobacteriaceae;;Fusobacteriaceae_uc;Fusobacteriaceae_uc_s	Fusobacteriaceae_uc_s	0.5622	1.01873	1.33028	0.36249	0.00651	0.13462	0	0	0	0	0	3.41483	87	149	174	54	1	19	0	0	0	0	0	484
	Bacteria;;;Firmicutes;;Bacilli;;Lactobacillales;;Streptococcaceae;;Streptococcus;Streptococcus_uc	Streptococcus_uc	0.02585	1.05976	0	0.07384	0.15615	0	0.00605	0.01078	1.65342	0	0	2.98585	4	155	0	11	24	0	1	2	260	0	0	457
	Bacteria;;;Bacteroidetes;;Bacteroidia;;Bacteroidales;;Bacteroidaceae;;Bacteroides;HQ795065_s	HQ795065_s	0.20032	0	0.07645	0.04699	2.60898	0	0	0	0	0	0	2.93274	31	0	10	7	401	0	0	0	0	0	0	449
	Bacteria;;;Firmicutes;;Negativicutes;;Selenomonadales;;Veillonellaceae;;Veillonellaceae_uc;Veillonellaceae_uc_s	Veillonellaceae_uc_s	0.00646	0.01367	0.30581	2.2085	0.02602	0.04251	0.22367	0.01078	0	0	0.0123	2.84972	1	2	40	329	4	6	37	2	0	0	2	423
	Bacteria;;;Actinobacteria;;Coriobacteriia;;Coriobacteriales;;Coriobacteriaceae;;Collinsella;Collinsella tanakaei	Collinsella tanakaei	0	0	0	0	2.69356	0	0	0	0	0	0	2.69356	0	0	0	0	414	0	0	0	0	0	0	414
	Bacteria;;;Fusobacteria;;Fusobacteria_c;;Fusobacteriales;;Fusobacteriaceae;;Fusobacterium;HQ782658_s	HQ782658_s	0.12924	0.20511	2.56116	0.08727	0	0	0	0	0	0	0	2.98278	20	30	335	13	0	0	0	0	0	0	0	398
	Bacteria;;;Firmicutes;;Erysipelotrichi;;Erysipelotrichales;;Allobaculum_f;;Eubacterium_g1;Eubacterium_g1_uc	Eubacterium_g1_uc	0.06462	0.0547	0.00765	0.07384	0.11061	0.06377	0.13299	0.78142	0.69952	0.04747	0.30754	2.34413	10	8	1	11	17	9	22	145	110	8	50	391
	Bacteria;;;Actinobacteria;;Actinobacteria_c;;Bifidobacteriales;;Bifidobacteriaceae;;Bifidobacterium;Bifidobacterium longum group	Bifidobacterium longum group	0	0	0	0	0	0	2.29718	0.00539	0	0	0	2.30257	0	0	0	0	0	0	380	1	0	0	0	381
	Bacteria;;;Bacteroidetes;;Bacteroidia;;Bacteroidales;;Bacteroidaceae;;Bacteroides;DQ113685_s	DQ113685_s	0	0	2.46942	0.34906	0	0	0	0	0	0	0	2.81848	0	0	323	52	0	0	0	0	0	0	0	375
	Bacteria;;;Firmicutes;;Bacilli;;Lactobacillales;;Lactobacillaceae;;Lactobacillaceae_uc;Lactobacillaceae_uc_s	Lactobacillaceae_uc_s	0	0	0	0	0	0	2.24278	0.01617	0	0	0	2.25895	0	0	0	0	0	0	371	3	0	0	0	374
	Bacteria;;;Firmicutes;;Erysipelotrichi;;Erysipelotrichales;;Coprobacillus_f;;Clostridium_g6;Clostridium_g6_uc	Clostridium_g6_uc	0.00646	0.02051	0	0.02014	0.07157	0.00709	0.17531	0.32335	0.16534	0.8901	0.48591	2.16578	1	3	0	3	11	1	29	60	26	150	79	363
	Bacteria;;;Fusobacteria;;Fusobacteria_c;;Fusobacteriales;;Fusobacteriaceae;;Fusobacterium;HQ772845_s	HQ772845_s	0	0.02735	2.69878	0.03356	0	0	0	0	0	0	0	2.75969	0	4	353	5	0	0	0	0	0	0	0	362
	Bacteria;;;Bacteroidetes;;Bacteroidia;;Bacteroidales;;Bacteroidaceae;;Bacteroides;Bacteroides uniformis	Bacteroides uniformis	0	0	0	0	0	0	0	0	0	0	2.17124	2.17124	0	0	0	0	0	0	0	0	0	0	353	353
	Bacteria;;;Firmicutes;;Clostridia;;Clostridiales;;Lachnospiraceae;;Dorea;EF402902_s	EF402902_s	0	0.00684	0	0	0	0	0	0	0	2.05317	0	2.06001	0	1	0	0	0	0	0	0	0	346	0	347
	Bacteria;;;Firmicutes;;Erysipelotrichi;;Erysipelotrichales;;Allobaculum_f;;Eubacterium_g1;Eubacterium dolichum	Eubacterium dolichum	0.41357	0.30767	0.11468	0.34235	1.01496	0	0	0	0	0	0	2.19323	64	45	15	51	156	0	0	0	0	0	0	331
	Bacteria;;;Firmicutes;;Clostridia;;Clostridiales;;Lachnospiraceae;;Blautia;DQ804430_s	DQ804430_s	0	0	0.06881	0.10069	0.65712	0.70852	0	0.52274	0	0	0	2.05788	0	0	9	15	101	100	0	97	0	0	0	322
	Bacteria;;;Firmicutes;;Clostridia;;Clostridiales;;Lachnospiraceae;;Hungatella;Hungatella_uc	Hungatella_uc	0.14863	0.09572	0.13761	0.1074	0.46194	0.14879	0.13299	0.15089	0.05723	0.49252	0	1.93372	23	14	18	16	71	21	22	28	9	83	0	305
	Bacteria;;;Firmicutes;;Clostridia;;Clostridiales;;Peptostreptococcaceae;;Peptostreptococcaceae_uc;Peptostreptococcaceae_uc_s	Peptostreptococcaceae_uc_s	0.34895	0.17093	0.38991	0.49003	0.06506	0.01417	0.07254	0.01078	0.05087	0.10681	0.23373	1.95378	54	25	51	73	10	2	12	2	8	18	38	293
	Bacteria;;;Bacteroidetes;;Bacteroidia;;Bacteroidales;;Bacteroidaceae;;Bacteroides;EU463313_s	EU463313_s	0	0	1.78899	0.34235	0.00651	0	0	0	0	0	0	2.13785	0	0	234	51	1	0	0	0	0	0	0	286
	Bacteria;;;Firmicutes;;Clostridia;;Clostridiales;;Lachnospiraceae;;Blautia;EU771861_s	EU771861_s	0	0	0.8792	1.12103	0	0	0	0	0	0	0.00615	2.00638	0	0	115	167	0	0	0	0	0	0	1	283
	Bacteria;;;Firmicutes;;Clostridia;;Clostridiales;;Lachnospiraceae;;Dorea;EU772949_s	EU772949_s	0.17447	0.15042	0.46636	0.85923	0.09759	0.02126	0.09672	0	0.04452	0	0	1.91057	27	22	61	128	15	3	16	0	7	0	0	279
	Bacteria;;;Firmicutes;;Bacilli;;Lactobacillales;;Streptococcaceae;;Streptococcus;Streptococcus gallolyticus group	Streptococcus gallolyticus group	0.00646	0.1846	0	0.24166	1.34678	0	0	0	0.05087	0	0	1.83037	1	27	0	36	207	0	0	0	8	0	0	279
	Bacteria;;;Firmicutes;;Clostridia;;Clostridiales;;Peptostreptococcaceae;;Terrisporobacter;Terrisporobacter petrolearius	Terrisporobacter petrolearius	0.04523	0.01367	0	0	0.05205	0	0	0	0.73768	0	0.7873	1.63593	7	2	0	0	8	0	0	0	116	0	128	261
	Bacteria;;;Firmicutes;;Bacilli;;Lactobacillales;;Streptococcaceae;;Lactococcus;EU460490_s	EU460490_s	1.25363	0.38288	0	0	0.00651	0	0	0	0	0	0	1.64302	194	56	0	0	1	0	0	0	0	0	0	251
	Bacteria;;;Firmicutes;;Clostridia;;Clostridiales;;Peptostreptococcaceae;;Clostridium_g4;GQ867474_s	GQ867474_s	0	0	0.31346	1.32913	0	0.00709	0	0	0	0	0	1.64968	0	0	41	198	0	1	0	0	0	0	0	240
	Bacteria;;;Firmicutes;;Negativicutes;;Selenomonadales;;Veillonellaceae;;Megamonas;FJ978672_s	FJ978672_s	0	0	1.75841	0	0	0	0	0	0	0	0	1.75841	0	0	230	0	0	0	0	0	0	0	0	230
	Bacteria;;;Firmicutes;;Clostridia;;Clostridiales;;Clostridiaceae;;Clostridium;Eubacterium tarantellae	Eubacterium tarantellae	0.53635	0.97087	0	0	0.02602	0	0	0	0	0	0	1.53324	83	142	0	0	4	0	0	0	0	0	0	229
	Bacteria;;;Proteobacteria;;Betaproteobacteria;;Burkholderiales;;Sutterella_f;;Sutterella;JH815513_s	JH815513_s	0	0	0.61927	0.01343	0.7352	0	0.01209	0	0	0	0.17837	1.55836	0	0	81	2	113	0	2	0	0	0	29	227
	Bacteria;;;Firmicutes;;Clostridia;;Clostridiales;;Lachnospiraceae;;FJ825526_g;FJ825526_s	FJ825526_s	0.01939	0.06153	0.00765	0.04028	0.12362	0.04251	0.00605	0.16167	0	0.86637	0	1.32907	3	9	1	6	19	6	1	30	0	146	0	221
	Bacteria;;;Firmicutes;;Clostridia;;Clostridiales;;Lachnospiraceae;;Eisenbergiella;DQ804469_s	DQ804469_s	0.87237	0.57432	0	0	0	0	0	0	0	0	0	1.44669	135	84	0	0	0	0	0	0	0	0	0	219
	Bacteria;;;Fusobacteria;;Fusobacteria_c;;Fusobacteriales;;Fusobacteriaceae;;Fusobacterium;HQ782813_s	HQ782813_s	0.08401	0.21879	1.24618	0.03356	0	0	0	0	0	0	0	1.58254	13	32	163	5	0	0	0	0	0	0	0	213
	Bacteria;;;Firmicutes;;Clostridia;;Clostridiales;;Lachnospiraceae;;Clostridium_g23;Clostridium glycyrrhizinilyticum	Clostridium glycyrrhizinilyticum	0.27141	0.12991	0.02294	0.98678	0.00651	0	0	0	0	0	0	1.41755	42	19	3	147	1	0	0	0	0	0	0	212
	Bacteria;;;Proteobacteria;;Gammaproteobacteria;;Enterobacteriales;;Enterobacteriaceae;;Enterobacteriaceae_uc;Enterobacteriaceae_uc_s	Enterobacteriaceae_uc_s	0.03231	0.02051	0	0.02014	0.00651	0	0.02418	0	0.62957	0.10681	0.41826	1.25829	5	3	0	3	1	0	4	0	99	18	68	201
	Bacteria;;;Bacteroidetes;;Bacteroidia;;Bacteroidales;;Bacteroidaceae;;Bacteroides;DQ809262_s	DQ809262_s	0	0	0	0	0	1.41703	0	0	0	0	0	1.41703	0	0	0	0	0	200	0	0	0	0	0	200
	Bacteria;;;Firmicutes;;Clostridia;;Clostridiales;;Peptostreptococcaceae;;Clostridium_g4;Clostridium ghonii	Clostridium ghonii	0.94992	0.21195	0.01529	0.04699	0	0	0	0	0	0	0	1.22415	147	31	2	7	0	0	0	0	0	0	0	187
	Bacteria;;;Firmicutes;;Bacilli;;Lactobacillales;;Enterococcaceae;;Enterococcus;Enterococcus cecorum	Enterococcus cecorum	0.01292	0	0	1.19487	0.01952	0	0	0	0	0	0	1.22731	2	0	0	178	3	0	0	0	0	0	0	183
	Bacteria;;;Firmicutes;;Bacilli;;Lactobacillales;;Streptococcaceae;;Streptococcaceae_uc;Streptococcaceae_uc_s	Streptococcaceae_uc_s	0.06462	0.46493	0	0.00671	0.05205	0	0.01209	0.00539	0.5787	0	0	1.18449	10	68	0	1	8	0	2	1	91	0	0	181
	Bacteria;;;Firmicutes;;Clostridia;;Clostridiales;;Clostridiaceae;;Clostridium;Clostridium colicanis	Clostridium colicanis	0.5622	0.61534	0	0	0	0	0	0	0	0	0	1.17754	87	90	0	0	0	0	0	0	0	0	0	177
	Bacteria;;;Firmicutes;;Clostridia;;Clostridiales;;Lachnospiraceae;;Hungatella;EF401218_s	EF401218_s	0	0.00684	0.12997	0	0.47495	0	0	0.11317	0.30525	0.05341	0	1.08359	0	1	17	0	73	0	0	21	48	9	0	169
	Bacteria;;;Firmicutes;;Clostridia;;Clostridiales;;Peptostreptococcaceae;;Asaccharospora;FJ681620_s	FJ681620_s	0.82068	0.02735	0.00765	0.13426	0.01301	0.00709	0.00605	0	0.04452	0	0.0123	1.07291	127	4	1	20	2	1	1	0	7	0	2	165
	Bacteria;;;Bacteroidetes;;Bacteroidia;;Bacteroidales;;Prevotellaceae;;Prevotella;DQ796138_s	DQ796138_s	0	0	1.23089	0	0	0.00709	0	0	0	0	0	1.23798	0	0	161	0	0	1	0	0	0	0	0	162
	Bacteria;;;Firmicutes;;Clostridia;;Clostridiales;;Lachnospiraceae;;Coprococcus_g2;Coprococcus_g2_uc	Coprococcus_g2_uc	0.1874	0.04102	0.03823	0.06041	0.14314	0.04251	0.02418	0.22634	0.05087	0.17209	0	0.98619	29	6	5	9	22	6	4	42	8	29	0	160
	Bacteria;;;Firmicutes;;Bacilli;;Lactobacillales;;Enterococcaceae;;Enterococcus;Enterococcus_uc	Enterococcus_uc	0.00646	0.0547	0	0.16782	0.00651	0	0.01814	0	0	0.29077	0.44901	0.99341	1	8	0	25	1	0	3	0	0	49	73	160
	Bacteria;;;Bacteroidetes;;Bacteroidia;;Bacteroidales;;Prevotellaceae;;Alloprevotella;Alloprevotella_uc	Alloprevotella_uc	0	0	1.10856	0	0	0	0	0	0	0.00593	0	1.11449	0	0	145	0	0	0	0	0	0	1	0	146
	Bacteria;;;Firmicutes;;Clostridia;;Clostridiales;;Lachnospiraceae;;Anaerostipes;Anaerostipes caccae	Anaerostipes caccae	0.00646	0	0	0	0	0	0.00605	0.03233	0.01272	0.07121	0.75655	0.88532	1	0	0	0	0	0	1	6	2	12	123	145
	Bacteria;;;Actinobacteria;;Coriobacteriia;;Coriobacteriales;;Coriobacteriaceae;;Collinsella;Collinsella_uc	Collinsella_uc	0	0	0.237	0.40277	0.29928	0	0.00605	0	0.00636	0	0	0.95146	0	0	31	60	46	0	1	0	1	0	0	139
	Bacteria;;;Firmicutes;;Clostridia;;Clostridiales;;Lachnospiraceae;;Blautia;EU468400_s	EU468400_s	0	0	0.02294	0.15439	0.06506	0	0	0.5443	0	0	0	0.78669	0	0	3	23	10	0	0	101	0	0	0	137
	Bacteria;;;Bacteroidetes;;Bacteroidia;;Bacteroidales;;Bacteroidaceae;;Bacteroides;HQ784229_s	HQ784229_s	0	0	0.00765	0	0	0	0	0	0	0	0.83036	0.83801	0	0	1	0	0	0	0	0	0	0	135	136
	Bacteria;;;Firmicutes;;Clostridia;;Clostridiales;;Lachnospiraceae;;GQ898349_g;EF400787_s	EF400787_s	0.03231	0.08888	0.19113	0.0537	0.54652	0	0	0	0	0	0	0.91254	5	13	25	8	84	0	0	0	0	0	0	135
	Bacteria;;;Proteobacteria;;Betaproteobacteria;;Burkholderiales;;Sutterella_f;;Sutterella;Sutterella wadsworthensis	Sutterella wadsworthensis	0	0	0	0	0	0	0	0	0	0	0.7873	0.7873	0	0	0	0	0	0	0	0	0	0	128	128
	Bacteria;;;Firmicutes;;Clostridia;;Clostridiales;;Peptostreptococcaceae;;Romboutsia;HQ768009_s	HQ768009_s	0	0	0	0	0.80026	0.00709	0	0	0	0.0178	0	0.82515	0	0	0	0	123	1	0	0	0	3	0	127
	Bacteria;;;Firmicutes;;Clostridia;;Clostridiales;;Lachnospiraceae;;Dorea;HQ808286_s	HQ808286_s	0.04523	0.10939	0.03058	0.06713	0.26675	0.0496	0.04836	0.02695	0.00636	0.16615	0	0.8165	7	16	4	10	41	7	8	5	1	28	0	127
	Bacteria;;;Proteobacteria;;Gammaproteobacteria;;Aeromonadales;;Succinivibrionaceae;;Succinivibrio;FJ978526_s	FJ978526_s	0	0	0.94037	0	0	0	0	0	0	0	0	0.94037	0	0	123	0	0	0	0	0	0	0	0	123
	Bacteria;;;Bacteroidetes;;Bacteroidia;;Bacteroidales;;Prevotellaceae;;Prevotella;EU459805_s	EU459805_s	0	0	0.92508	0	0	0.00709	0	0	0	0	0	0.93217	0	0	121	0	0	1	0	0	0	0	0	122
	Bacteria;;;Firmicutes;;Erysipelotrichi;;Erysipelotrichales;;Allobaculum_f;;Allobaculum_f_uc;Allobaculum_f_uc_s	Allobaculum_f_uc_s	0.01292	0.02735	0.01529	0.02014	0.03904	0.02834	0.05441	0.16706	0.23529	0.02967	0.11071	0.74022	2	4	2	3	6	4	9	31	37	5	18	121
	Bacteria;;;Bacteroidetes;;Bacteroidia;;Bacteroidales;;Prevotellaceae;;Prevotellaceae_uc;Prevotellaceae_uc_s	Prevotellaceae_uc_s	0.01292	0	0.71101	0.03356	0	0.07794	0.01814	0	0.0318	0	0.0123	0.89767	2	0	93	5	0	11	3	0	5	0	2	121
	Bacteria;;;Firmicutes;;Clostridia;;Clostridiales;;Ruminococcaceae;;Butyricicoccus;EU772680_s	EU772680_s	0	0.08888	0	0.01343	0.11711	0.54556	0	0.01078	0.05087	0	0	0.82663	0	13	0	2	18	77	0	2	8	0	0	120
	Bacteria;;;Firmicutes;;Clostridia;;Clostridiales;;Peptostreptococcaceae;;Romboutsia;Romboutsia sedimentorum	Romboutsia sedimentorum	0.00646	0	0	0	0	0	0.00605	0	0.1717	0.50439	0.0246	0.7132	1	0	0	0	0	0	1	0	27	85	4	118
	Bacteria;;;Firmicutes;;Erysipelotrichi;;Erysipelotrichales;;Coprobacillus_f;;Coprobacillus_f_uc;Coprobacillus_f_uc_s	Coprobacillus_f_uc_s	0.01292	0.00684	0	0	0.02602	0	0.01814	0.14012	0.03816	0.30857	0.13532	0.68609	2	1	0	0	4	0	3	26	6	52	22	116
	Bacteria;;;Bacteroidetes;;Bacteroidia;;Bacteroidales;;Bacteroidaceae;;Bacteroides;DQ805799_s	DQ805799_s	0	0	0	0	0	0.12045	0	0	0	0	0.59048	0.71093	0	0	0	0	0	17	0	0	0	0	96	113
	Bacteria;;;Firmicutes;;Clostridia;;Clostridiales;;Clostridiaceae;;Clostridium;Clostridium sardiniense	Clostridium sardiniense	0.08401	0.64953	0	0	0	0	0	0.00539	0.00636	0.00593	0.00615	0.75737	13	95	0	0	0	0	0	1	1	1	1	112
	Bacteria;;;Firmicutes;;Clostridia;;Clostridiales;;Lachnospiraceae;;Clostridium_g12;Eubacterium fissicatena	Eubacterium fissicatena	0.06462	0	0	0	0.02602	0	0	0.31257	0.05723	0.0356	0	0.49604	10	0	0	0	4	0	0	58	9	6	0	87
	Bacteria;;;Firmicutes;;Clostridia;;Clostridiales;;Lachnospiraceae;;FJ825526_g;FJ825526_g_uc	FJ825526_g_uc	0.01292	0.07521	0.00765	0.03356	0.07807	0.03543	0.06045	0.05928	0	0.16615	0.00615	0.53487	2	11	1	5	12	5	10	11	0	28	1	86
	Bacteria;;;Bacteroidetes;;Bacteroidia;;Bacteroidales;;Prevotellaceae;;Prevotella;Prevotella_uc	Prevotella_uc	0.00646	0	0.59633	0.00671	0.00651	0.00709	0	0	0	0	0	0.6231	1	0	78	1	1	1	0	0	0	0	0	82
	Bacteria;;;Firmicutes;;Clostridia;;Clostridiales;;Clostridiaceae;;Clostridium;EU473214_s	EU473214_s	0.27141	0.10939	0	0	0	0	0	0	0.09539	0	0.04921	0.5254	42	16	0	0	0	0	0	0	15	0	8	81
	Bacteria;;;Bacteroidetes;;Bacteroidia;;Bacteroidales;;Bacteroidaceae;;Bacteroides;FJ511984_s	FJ511984_s	0.00646	0	0	0.01343	0	0.48888	0	0	0	0	0.03075	0.53952	1	0	0	2	0	69	0	0	0	0	5	77
	Bacteria;;;Firmicutes;;Clostridia;;Clostridiales;;Clostridiales_uc;;Clostridiales_uc_g;Clostridiales_uc_s	Clostridiales_uc_s	0.0517	0.04786	0.12997	0.06713	0.03904	0.06377	0.02418	0.00539	0.0318	0.02374	0.0123	0.49688	8	7	17	10	6	9	4	1	5	4	2	73
	Bacteria;;;Firmicutes;;Bacilli;;Lactobacillales;;Enterococcaceae;;Enterococcaceae_uc;Enterococcaceae_uc_s	Enterococcaceae_uc_s	0.01292	0.06837	0.00765	0.04699	0	0.00709	0	0	0	0.09494	0.20298	0.44094	2	10	1	7	0	1	0	0	0	16	33	70
	Bacteria;;;Firmicutes;;Clostridia;;Clostridiales;;Clostridiaceae;;Clostridium;AF275949_s	AF275949_s	0	0.01367	0	0	0	0	0	0.097	0.30525	0	0	0.41592	0	2	0	0	0	0	0	18	48	0	0	68
	Bacteria;;;Firmicutes;;Clostridia;;Clostridiales;;Clostridium_g7_f;;Clostridium_g7;Clostridium lactatifermentans	Clostridium lactatifermentans	0	0	0	0	0	0	0	0.21556	0.1717	0	0	0.38726	0	0	0	0	0	0	0	40	27	0	0	67
	Bacteria;;;Firmicutes;;Clostridia;;Clostridiales;;Lachnospiraceae;;GQ896690_g;GQ896690_s	GQ896690_s	0	0.01367	0.04587	0.12083	0.11061	0.08502	0	0.02156	0	0.04154	0	0.4391	0	2	6	18	17	12	0	4	0	7	0	66
	Bacteria;;;Firmicutes;;Clostridia;;Clostridiales;;Lachnospiraceae;;Eisenbergiella;Eisenbergiella_uc	Eisenbergiella_uc	0.20679	0.20511	0	0	0	0	0.00605	0	0	0.01187	0	0.42982	32	30	0	0	0	0	1	0	0	2	0	65
	Bacteria;;;Firmicutes;;Clostridia;;Clostridiales;;Lachnospiraceae;;GQ898349_g;GQ898349_g_uc	GQ898349_g_uc	0.03231	0.03419	0.0841	0.04028	0.18217	0	0	0.02156	0	0.00593	0	0.40054	5	5	11	6	28	0	0	4	0	1	0	60
	Bacteria;;;Firmicutes;;Clostridia;;Clostridiales;;Clostridiaceae;;Clostridium;Clostridium septicum	Clostridium septicum	0.04523	0.1846	0	0.00671	0	0.01417	0	0.03233	0.08267	0.01187	0	0.37758	7	27	0	1	0	2	0	6	13	2	0	58
	Bacteria;;;Firmicutes;;Clostridia;;Clostridiales;;Lachnospiraceae;;EU457907_g;EU457907_s	EU457907_s	0.01939	0.02051	0.03823	0.00671	0.09759	0.03543	0.02418	0.07006	0	0.04747	0	0.35957	3	3	5	1	15	5	4	13	0	8	0	57
	Bacteria;;;Firmicutes;;Clostridia;;Clostridiales;;Lachnospiraceae;;Blautia;Blautia stercoris	Blautia stercoris	0.00646	0.02735	0.06881	0.07384	0.11061	0	0	0.07006	0	0	0	0.35713	1	4	9	11	17	0	0	13	0	0	0	55
	Bacteria;;;Firmicutes;;Clostridia;;Clostridiales;;Clostridiaceae;;Clostridium;EU461309_s	EU461309_s	0.22617	0.10939	0	0	0	0	0	0	0.00636	0	0.01845	0.36037	35	16	0	0	0	0	0	0	1	0	3	55
	Bacteria;;;Firmicutes;;Erysipelotrichi;;Erysipelotrichales;;Coprobacillus_f;;Clostridium_g6;Clostridium spiroforme	Clostridium spiroforme	0	0	0	0	0.00651	0	0	0.27484	0	0.00593	0	0.28728	0	0	0	0	1	0	0	51	0	1	0	53
	Bacteria;;;Bacteroidetes;;Bacteroidia;;Bacteroidales;;Porphyromonadaceae;;Parabacteroides;Parabacteroides_uc	Parabacteroides_uc	0.00646	0	0.00765	0	0	0.00709	0	0	0	0	0.30754	0.32874	1	0	1	0	0	1	0	0	0	0	50	53
	Bacteria;;;Firmicutes;;Clostridia;;Clostridiales;;Peptostreptococcaceae;;Clostridium_g4;HQ661234_s	HQ661234_s	0.2391	0.08888	0	0.01343	0	0	0	0	0.00636	0	0	0.34777	37	13	0	2	0	0	0	0	1	0	0	53
	Bacteria;;;Firmicutes;;Clostridia;;Clostridiales;;Lachnospiraceae;;Dorea;DQ800477_s	DQ800477_s	0	0.00684	0	0.00671	0.00651	0	0	0	0	0.29077	0	0.31083	0	1	0	1	1	0	0	0	0	49	0	52
	Bacteria;;;Actinobacteria;;Actinobacteria_c;;Bifidobacteriales;;Bifidobacteriaceae;;Bifidobacterium;Bifidobacterium_uc	Bifidobacterium_uc	0	0.00684	0.01529	0.00671	0.00651	0.00709	0.26599	0.00539	0	0.00593	0	0.31975	0	1	2	1	1	1	44	1	0	1	0	52
	Bacteria;;;Firmicutes;;Clostridia;;Clostridiales;;Lachnospiraceae;;Ruminococcus_g5;EF401207_s	EF401207_s	0.03231	0.02051	0	0.25508	0.03253	0	0	0	0	0	0	0.34043	5	3	0	38	5	0	0	0	0	0	0	51
	Bacteria;;;Bacteroidetes;;Bacteroidia;;Bacteroidales;;Bacteroidaceae;;Bacteroides;DQ799557_s	DQ799557_s	0	0	0.03058	0	0	0	0	0	0	0	0.28909	0.31967	0	0	4	0	0	0	0	0	0	0	47	51
	Bacteria;;;Proteobacteria;;Betaproteobacteria;;Burkholderiales;;Sutterella_f;;Sutterella;Sutterella_uc	Sutterella_uc	0	0	0.07645	0	0.08458	0.00709	0.00605	0	0	0	0.15377	0.32794	0	0	10	0	13	1	1	0	0	0	25	50
	Bacteria;;;Firmicutes;;Clostridia;;Clostridiales;;Lachnospiraceae;;Blautia;DQ456377_s	DQ456377_s	0.00646	0.02051	0.05352	0.04699	0.09759	0.02126	0	0.05389	0.01908	0.00593	0	0.32523	1	3	7	7	15	3	0	10	3	1	0	50
	Bacteria;;;Firmicutes;;Clostridia;;Clostridiales;;Lachnospiraceae;;Hungatella;FJ681675_s	FJ681675_s	0.00646	0.02735	0.02294	0.00671	0.05856	0	0	0.05928	0	0.11275	0	0.29405	1	4	3	1	9	0	0	11	0	19	0	48
	Bacteria;;;Actinobacteria;;Coriobacteriia;;Coriobacteriales;;Coriobacteriaceae;;Coriobacteriaceae_uc;Coriobacteriaceae_uc_s	Coriobacteriaceae_uc_s	0	0	0.10703	0.14097	0.05205	0	0.01814	0.00539	0.00636	0	0	0.32994	0	0	14	21	8	0	3	1	1	0	0	48
	Bacteria;;;Actinobacteria;;Actinobacteria_c;;Bifidobacteriales;;Bifidobacteriaceae;;Bifidobacterium;Bifidobacterium catenulatum	Bifidobacterium catenulatum	0	0	0	0	0	0	0.28413	0	0	0	0	0.28413	0	0	0	0	0	0	47	0	0	0	0	47
	Bacteria;;;Proteobacteria;;Gammaproteobacteria;;Enterobacteriales;;Enterobacteriaceae;;Klebsiella;Klebsiella pneumoniae group	Klebsiella pneumoniae group	0	0.00684	0	0	0	0	0	0	0	0.00593	0.26449	0.27726	0	1	0	0	0	0	0	0	0	1	43	45
	Bacteria;;;Firmicutes;;Clostridia;;Clostridiales;;Lachnospiraceae;;GQ896690_g;GQ896690_g_uc	GQ896690_g_uc	0	0.02735	0.06881	0.08055	0.03253	0.02834	0	0.02156	0	0.04154	0	0.30068	0	4	9	12	5	4	0	4	0	7	0	45
	Bacteria;;;Firmicutes;;Clostridia;;Clostridiales;;Lachnospiraceae;;GU304009_g;EU844853_s	EU844853_s	0	0	0.01529	0.02685	0.00651	0.0496	0	0.15628	0.00636	0.00593	0	0.26682	0	0	2	4	1	7	0	29	1	1	0	45
	Bacteria;;;Firmicutes;;Clostridia;;Clostridiales;;Lachnospiraceae;;Ruminococcus_g5;Ruminococcus_g5_uc	Ruminococcus_g5_uc	0.00646	0.02051	0.00765	0.10069	0.02602	0.04251	0	0.05389	0	0.02374	0	0.28147	1	3	1	15	4	6	0	10	0	4	0	44
	Bacteria;;;Firmicutes;;Clostridia;;Clostridiales;;Lachnospiraceae;;Clostridium_g23;Clostridium_g23_uc	Clostridium_g23_uc	0.03877	0.02735	0.01529	0.1074	0.01952	0.01417	0	0.02695	0.00636	0.02967	0	0.28548	6	4	2	16	3	2	0	5	1	5	0	44
	Bacteria;;;Firmicutes;;Clostridia;;Clostridiales;;Lachnospiraceae;;DQ057459_g;DQ796784_s	DQ796784_s	0	0	0	0.00671	0.00651	0.02834	0	0.17784	0	0.02374	0.00615	0.24929	0	0	0	1	1	4	0	33	0	4	1	44
	Bacteria;;;Bacteroidetes;;Bacteroidia;;Bacteroidales;;Bacteroidaceae;;Bacteroides;Bacteroides coprocola	Bacteroides coprocola	0	0	0.33639	0	0	0	0	0	0	0	0	0.33639	0	0	44	0	0	0	0	0	0	0	0	44
	Bacteria;;;Firmicutes;;Clostridia;;Clostridiales;;Clostridiaceae;;Clostridium;Eubacterium nitritogenes	Eubacterium nitritogenes	0.15509	0.11623	0	0.00671	0	0	0	0	0	0	0	0.27803	24	17	0	1	0	0	0	0	0	0	0	42
	Bacteria;;;Firmicutes;;Clostridia;;Clostridiales;;Lachnospiraceae;;Anaerostipes;BAHW_s	BAHW_s	0	0	0	0	0	0	0.02418	0.01617	0	0.02967	0.17222	0.24224	0	0	0	0	0	0	4	3	0	5	28	40
	Bacteria;;;Bacteroidetes;;Bacteroidia;;Bacteroidales;;Bacteroidales_uc;;Bacteroidales_uc_g;Bacteroidales_uc_s	Bacteroidales_uc_s	0.00646	0	0.06116	0.04699	0.01301	0.0496	0	0.01078	0.05087	0	0.03075	0.26962	1	0	8	7	2	7	0	2	8	0	5	40
	Bacteria;;;Bacteroidetes;;Bacteroidia;;Bacteroidales;;Bacteroidaceae;;Bacteroides;JN559675_s	JN559675_s	0.01292	0	0.02294	0	0.04554	0.01417	0	0	0	0	0.14762	0.24319	2	0	3	0	7	2	0	0	0	0	24	38
	Bacteria;;;Firmicutes;;Negativicutes;;Selenomonadales;;Acidaminococcaceae;;Phascolarctobacterium;Phascolarctobacterium faecium	Phascolarctobacterium faecium	0	0	0	0	0	0.26215	0	0	0	0	0	0.26215	0	0	0	0	0	37	0	0	0	0	0	37
	Bacteria;;;Firmicutes;;Clostridia;;Clostridiales;;Lachnospiraceae;;Blautia;EU465337_s	EU465337_s	0	0	0.02294	0.02014	0	0	0	0.16167	0	0	0	0.20475	0	0	3	3	0	0	0	30	0	0	0	36
	Bacteria;;;Firmicutes;;Clostridia;;Clostridiales;;Ruminococcaceae;;Ruminococcaceae_uc;Ruminococcaceae_uc_s	Ruminococcaceae_uc_s	0.01939	0.03419	0.03823	0.06041	0.02602	0.01417	0.00605	0.00539	0.00636	0.01187	0.0123	0.23438	3	5	5	9	4	2	1	1	1	2	2	35
	Bacteria;;;Firmicutes;;Negativicutes;;Selenomonadales;;Acidaminococcaceae;;Phascolarctobacterium;DQ113674_s	DQ113674_s	0	0	0.26758	0	0	0	0	0	0	0	0	0.26758	0	0	35	0	0	0	0	0	0	0	0	35
	Bacteria;;;Bacteroidetes;;Bacteroidia;;Bacteroidales;;Porphyromonadaceae;;Porphyromonadaceae_uc;Porphyromonadaceae_uc_s	Porphyromonadaceae_uc_s	0	0.00684	0	0	0	0.04251	0.00605	0	0.00636	0.00593	0.15377	0.22146	0	1	0	0	0	6	1	0	1	1	25	35
	Bacteria;;;Bacteroidetes;;Bacteroidia;;Bacteroidales;;Bacteroidaceae;;Bacteroides;HQ810970_s	HQ810970_s	0	0	0	0	0	0	0	0	0	0	0.21528	0.21528	0	0	0	0	0	0	0	0	0	0	35	35
	Bacteria;;;Firmicutes;;Clostridia;;Clostridiales;;Ruminococcaceae;;Faecalibacterium;GL538271_s	GL538271_s	0	0	0.24465	0	0	0.01417	0	0	0	0	0	0.25882	0	0	32	0	0	2	0	0	0	0	0	34
	Bacteria;;;Firmicutes;;Clostridia;;Clostridiales;;Lachnospiraceae;;Blautia;EU776698_s	EU776698_s	0	0.02051	0.03823	0.04699	0.1041	0	0	0.01078	0	0	0	0.22061	0	3	5	7	16	0	0	2	0	0	0	33
	Bacteria;;;Firmicutes;;Clostridia;;Clostridiales;;Clostridiaceae;;Clostridium;Clostridium tertium	Clostridium tertium	0.01292	0.02051	0	0	0	0	0.00605	0	0	0	0.15992	0.1994	2	3	0	0	0	0	1	0	0	0	26	32
	Bacteria;;;Firmicutes;;Bacilli;;Lactobacillales;;Enterococcaceae;;Enterococcus;Enterococcus thailandicus group	Enterococcus thailandicus group	0	0	0	0	0	0	0	0	0	0.16615	0.0246	0.19075	0	0	0	0	0	0	0	0	0	28	4	32
	Bacteria;;;Firmicutes;;Clostridia;;Clostridiales;;Lachnospiraceae;;Coprococcus_g2;EU460192_s	EU460192_s	0.03877	0.00684	0	0.04028	0.03253	0	0	0.05389	0.02544	0	0	0.19775	6	1	0	6	5	0	0	10	4	0	0	32
	Bacteria;;;Fusobacteria;;Fusobacteria_c;;Fusobacteriales;;Fusobacteriaceae;;Fusobacterium;Fusobacterium mortiferum	Fusobacterium mortiferum	0.01939	0.02735	0.1682	0.00671	0	0	0	0.00539	0	0	0	0.22704	3	4	22	1	0	0	0	1	0	0	0	31
	Bacteria;;;Firmicutes;;Bacilli;;Lactobacillales;;Streptococcaceae;;Lactococcus;Lactococcus_uc	Lactococcus_uc	0.16155	0.04102	0	0	0	0	0	0	0	0	0	0.20257	25	6	0	0	0	0	0	0	0	0	0	31
	Bacteria;;;Firmicutes;;Clostridia;;Clostridiales;;Lachnospiraceae;;Ruminococcus_g5;EF405414_s	EF405414_s	0.00646	0.00684	0	0.00671	0	0.0496	0	0.07545	0	0.04154	0	0.1866	1	1	0	1	0	7	0	14	0	7	0	31
	Bacteria;;;Firmicutes;;Clostridia;;Clostridiales;;Lachnospiraceae;;Anaerostipes;DQ799505_s	DQ799505_s	0	0	0	0.04699	0.00651	0	0	0.08623	0.00636	0.0356	0	0.18169	0	0	0	7	1	0	0	16	1	6	0	31
	Bacteria;;;Firmicutes;;Clostridia;;Clostridiales;;Lachnospiraceae;;Dorea;DQ799761_s	DQ799761_s	0	0.02735	0.01529	0	0.02602	0.01417	0.02418	0.00539	0.01272	0.06527	0	0.19039	0	4	2	0	4	2	4	1	2	11	0	30
	Bacteria;;;Firmicutes;;Clostridia;;Clostridiales;;Lachnospiraceae;;Blautia;Blautia coccoides	Blautia coccoides	0.01939	0.03419	0.02294	0.03356	0.09109	0	0	0	0	0	0	0.20117	3	5	3	5	14	0	0	0	0	0	0	30
	Bacteria;;;Firmicutes;;Clostridia;;Clostridiales;;Lachnospiraceae;;EU457907_g;EU457907_g_uc	EU457907_g_uc	0	0.04102	0.00765	0.01343	0.01952	0.01417	0.01209	0.03233	0	0.04154	0	0.18175	0	6	1	2	3	2	2	6	0	7	0	29
	Bacteria;;;Bacteroidetes;;Bacteroidia;;Bacteroidales;;Prevotellaceae;;Prevotella;GQ492062_s	GQ492062_s	0.01292	0	0.20642	0	0	0	0	0	0	0	0	0.21934	2	0	27	0	0	0	0	0	0	0	0	29
	Bacteria;;;Fusobacteria;;Fusobacteria_c;;Fusobacteriales;;Fusobacteriaceae;;Fusobacterium;Fusobacterium ulcerans	Fusobacterium ulcerans	0.05816	0.06153	0.04587	0.02685	0	0	0	0	0	0	0	0.19241	9	9	6	4	0	0	0	0	0	0	0	28
	Bacteria;;;Firmicutes;;Clostridia;;Clostridiales;;Clostridiaceae;;Clostridium;EU775592_s	EU775592_s	0.01292	0.12991	0	0	0.01952	0	0	0	0.02544	0	0	0.18779	2	19	0	0	3	0	0	0	4	0	0	28
	Bacteria;;;Firmicutes;;Clostridia;;Clostridiales;;Peptostreptococcaceae;;Asaccharospora;Asaccharospora_uc	Asaccharospora_uc	0.09693	0.02735	0.00765	0.03356	0	0	0	0	0.00636	0.01187	0	0.18372	15	4	1	5	0	0	0	0	1	2	0	28
	Bacteria;;;Firmicutes;;Clostridia;;Clostridiales;;Lachnospiraceae;;DQ057459_g;DQ057459_g_uc	DQ057459_g_uc	0	0.00684	0.01529	0.01343	0.01952	0.02126	0	0.03233	0	0.04747	0.00615	0.16229	0	1	2	2	3	3	0	6	0	8	1	26
	Bacteria;;;Firmicutes;;Clostridia;;Clostridiales;;Lachnospiraceae;;Hungatella;DQ904927_s	DQ904927_s	0.03877	0.03419	0.00765	0.01343	0.03253	0	0	0.00539	0	0.0356	0	0.16756	6	5	1	2	5	0	0	1	0	6	0	26
	Bacteria;;;Bacteroidetes;;Bacteroidia;;Bacteroidales;;Prevotellaceae;;Prevotella;FJ511060_s	FJ511060_s	0	0	0.19113	0	0	0	0	0	0	0	0.00615	0.19728	0	0	25	0	0	0	0	0	0	0	1	26
	Bacteria;;;Firmicutes;;Clostridia;;Clostridiales;;Peptostreptococcaceae;;Romboutsia;Romboutsia_uc	Romboutsia_uc	0	0	0	0	0.07807	0	0	0	0.01272	0.06527	0.00615	0.16221	0	0	0	0	12	0	0	0	2	11	1	26
	Bacteria;;;Firmicutes;;Clostridia;;Clostridiales;;Clostridiaceae;;Clostridium;Sarcina ventriculi	Sarcina ventriculi	0.08401	0.07521	0	0	0	0.00709	0	0	0	0	0	0.16631	13	11	0	0	0	1	0	0	0	0	0	25
	Bacteria;;;Firmicutes;;Clostridia;;Clostridiales;;Lachnospiraceae;;Coprococcus_g2;AY685919_s	AY685919_s	0	0.00684	0.01529	0.02014	0.05205	0.02834	0	0	0	0.0356	0	0.15826	0	1	2	3	8	4	0	0	0	6	0	24
	Bacteria;;;Firmicutes;;Clostridia;;Clostridiales;;Lachnospiraceae;;Anaerostipes;Anaerostipes_uc	Anaerostipes_uc	0.00646	0	0	0.01343	0	0.00709	0	0.01078	0	0.02967	0.07996	0.14739	1	0	0	2	0	1	0	2	0	5	13	24
	Bacteria;;;Proteobacteria;;Betaproteobacteria;;Burkholderiales;;Sutterella_f;;Sutterella_f_uc;Sutterella_f_uc_s	Sutterella_f_uc_s	0	0	0.03058	0	0.05856	0	0.00605	0	0.00636	0	0.05536	0.15691	0	0	4	0	9	0	1	0	1	0	9	24
	Bacteria;;;Bacteroidetes;;Bacteroidia;;Bacteroidales;;Prevotellaceae;;Prevotella;EU462041_s	EU462041_s	0	0	0.18349	0	0	0	0	0	0	0	0	0.18349	0	0	24	0	0	0	0	0	0	0	0	24
	Bacteria;;;Firmicutes;;Clostridia;;Clostridiales;;Lachnospiraceae;;Dorea;PAC000479_s	PAC000479_s	0	0.0547	0.03058	0.02014	0.01301	0.00709	0.03023	0	0	0	0	0.15575	0	8	4	3	2	1	5	0	0	0	0	23
	Bacteria;;;Firmicutes;;Bacilli;;Lactobacillales;;Lactobacillales_uc;;Lactobacillales_uc_g;Lactobacillales_uc_s	Lactobacillales_uc_s	0	0.02735	0.00765	0.00671	0	0	0.06045	0	0.02544	0.01187	0.00615	0.14562	0	4	1	1	0	0	10	0	4	2	1	23
	Bacteria;;;Firmicutes;;Clostridia;;Clostridiales;;Clostridiaceae;;Clostridium;EU775668_s	EU775668_s	0.09047	0.02735	0	0	0.00651	0	0	0	0.01272	0	0.00615	0.1432	14	4	0	0	1	0	0	0	2	0	1	22
	Bacteria;;;Firmicutes;;Clostridia;;Clostridiales;;Ruminococcaceae;;Pseudoflavonifractor;Flavonifractor plautii	Flavonifractor plautii	0	0	0	0	0.02602	0.11336	0	0	0	0.01187	0	0.15125	0	0	0	0	4	16	0	0	0	2	0	22
	Bacteria;;;Firmicutes;;Clostridia;;Clostridiales;;Lachnospiraceae;;EU469747_g;EU469747_g_uc	EU469747_g_uc	0.01292	0.0547	0	0.00671	0.01301	0.00709	0.01814	0.00539	0.01908	0.00593	0	0.14297	2	8	0	1	2	1	3	1	3	1	0	22
	Bacteria;;;Bacteroidetes;;Bacteroidia;;Bacteroidales;;Bacteroidaceae;;Bacteroides;EU531945_s	EU531945_s	0	0	0	0	0	0.12045	0	0.00539	0	0	0.0246	0.15044	0	0	0	0	0	17	0	1	0	0	4	22
	Bacteria;;;Firmicutes;;Clostridia;;Clostridiales;;Lachnospiraceae;;Clostridium_g12;Clostridium_g12_uc	Clostridium_g12_uc	0.02585	0	0	0.00671	0.00651	0	0	0.06467	0.00636	0.01187	0	0.12197	4	0	0	1	1	0	0	12	1	2	0	21
	Bacteria;;;Firmicutes;;Clostridia;;Clostridiales;;Peptostreptococcaceae;;Terrisporobacter;Terrisporobacter_uc	Terrisporobacter_uc	0.01292	0	0	0	0.00651	0	0	0	0.05723	0	0.05536	0.13202	2	0	0	0	1	0	0	0	9	0	9	21
	Bacteria;;;Firmicutes;;Clostridia;;Clostridiales;;Ruminococcaceae;;Caproiciproducens;HM831097_s	HM831097_s	0	0	0	0	0	0	0.01209	0	0.01272	0	0.09841	0.12322	0	0	0	0	0	0	2	0	2	0	16	20
	Bacteria;;;Firmicutes;;Clostridia;;Clostridiales;;Clostridiaceae;;Clostridium;CCFI_s	CCFI_s	0	0.07521	0	0	0	0	0	0	0.04452	0	0.0123	0.13203	0	11	0	0	0	0	0	0	7	0	2	20
	Bacteria;;;Firmicutes;;Clostridia;;Clostridiales;;Lachnospiraceae;;Blautia;Blautia glucerasea	Blautia glucerasea	0	0	0	0	0.11711	0.00709	0	0	0	0	0	0.1242	0	0	0	0	18	1	0	0	0	0	0	19
	Bacteria;;;Firmicutes;;Clostridia;;Clostridiales;;Ruminococcaceae;;Pseudoflavonifractor;EF402926_s	EF402926_s	0	0	0	0	0	0.12753	0	0.00539	0	0	0	0.13292	0	0	0	0	0	18	0	1	0	0	0	19
	Bacteria;;;Bacteroidetes;;Bacteroidia;;Bacteroidales;;Bacteroidaceae;;Bacteroides;HQ816544_s	HQ816544_s	0	0	0.03058	0	0	0	0	0	0	0	0.08611	0.11669	0	0	4	0	0	0	0	0	0	0	14	18
	Bacteria;;;Proteobacteria;;Epsilonproteobacteria;;Campylobacterales;;Campylobacteraceae;;Campylobacter;Campylobacter upsaliensis	Campylobacter upsaliensis	0	0	0	0.11412	0.00651	0	0	0	0	0	0	0.12063	0	0	0	17	1	0	0	0	0	0	0	18
	Bacteria;;;Bacteroidetes;;Bacteroidia;;Bacteroidales;;Bacteroidaceae;;Bacteroides;FJ684447_s	FJ684447_s	0	0	0.13761	0	0	0	0	0	0	0	0	0.13761	0	0	18	0	0	0	0	0	0	0	0	18
	Bacteria;;;Firmicutes;;Negativicutes;;Selenomonadales;;Selenomonadales_uc;;Selenomonadales_uc_g;Selenomonadales_uc_s	Selenomonadales_uc_s	0	0	0.02294	0.06041	0	0	0.02418	0	0.01272	0	0	0.12025	0	0	3	9	0	0	4	0	2	0	0	18
	Bacteria;;;Firmicutes;;Clostridia;;Clostridiales;;Lachnospiraceae;;GU304009_g;GU304009_g_uc	GU304009_g_uc	0	0	0	0.01343	0	0.03543	0	0.05389	0	0	0	0.10275	0	0	0	2	0	5	0	10	0	0	0	17
	Bacteria;;;Firmicutes;;Clostridia;;Clostridiales;;Lachnospiraceae;;Clostridium_g23;JQ191035_s	JQ191035_s	0.01292	0	0	0.00671	0.01952	0.00709	0	0.02695	0	0.02967	0	0.10286	2	0	0	1	3	1	0	5	0	5	0	17
	Bacteria;;;Firmicutes;;Clostridia;;Clostridia_uc;;Clostridia_uc_f;;Clostridia_uc_g;Clostridia_uc_s	Clostridia_uc_s	0.01292	0.00684	0.02294	0.01343	0.01301	0	0.00605	0.01078	0.01272	0.00593	0.00615	0.11077	2	1	3	2	2	0	1	2	2	1	1	17
	Bacteria;;;Actinobacteria;;Coriobacteriia;;Coriobacteriales;;Coriobacteriaceae;;Slackia;Slackia piriformis	Slackia piriformis	0	0	0.00765	0	0.1041	0	0	0	0	0	0	0.11175	0	0	1	0	16	0	0	0	0	0	0	17
	Bacteria;;;Firmicutes;;Clostridia;;Clostridiales;;Lachnospiraceae;;Coprococcus_g2;HM124264_s	HM124264_s	0	0	0	0	0	0	0	0.05928	0.01908	0.0178	0	0.09616	0	0	0	0	0	0	0	11	3	3	0	17
	Bacteria;;;Firmicutes;;Clostridia;;Clostridiales;;Peptostreptococcaceae;;Romboutsia;EU475630_s	EU475630_s	0.03231	0.00684	0	0	0.02602	0	0	0	0.02544	0	0.0123	0.10291	5	1	0	0	4	0	0	0	4	0	2	16
	Bacteria;;;Firmicutes;;Clostridia;;Clostridiales;;Lachnospiraceae;;Hungatella;PAC000671_s	PAC000671_s	0	0	0	0	0	0	0	0	0	0.09494	0	0.09494	0	0	0	0	0	0	0	0	0	16	0	16
	Bacteria;;;Fusobacteria;;Fusobacteria_c;;Fusobacteriales;;Fusobacteriales_uc;;Fusobacteriales_uc_g;Fusobacteriales_uc_s	Fusobacteriales_uc_s	0	0.02051	0.05352	0.01343	0	0.02834	0	0	0	0	0	0.1158	0	3	7	2	0	4	0	0	0	0	0	16
	Bacteria;;;Firmicutes;;Clostridia;;Clostridiales;;Lachnospiraceae;;Hungatella;ACFX_s	ACFX_s	0	0	0	0	0	0.09211	0	0.00539	0	0.00593	0	0.10343	0	0	0	0	0	13	0	1	0	1	0	15
	Bacteria;;;Firmicutes;;Clostridia;;Clostridiales;;Lachnospiraceae;;Hungatella;EU459649_s	EU459649_s	0.01292	0	0.01529	0	0.00651	0.00709	0	0.00539	0.00636	0.04154	0	0.0951	2	0	2	0	1	1	0	1	1	7	0	15
	Bacteria;;;Firmicutes;;Bacilli;;Lactobacillales;;Lactobacillaceae;;Lactobacillus;EU454989_s	EU454989_s	0	0	0	0	0	0	0.09068	0	0	0	0	0.09068	0	0	0	0	0	0	15	0	0	0	0	15
	Bacteria;;;Firmicutes;;Clostridia;;Clostridiales;;Clostridiaceae;;Clostridium;GQ360027_s	GQ360027_s	0.05816	0.03419	0	0	0	0	0	0	0	0	0	0.09235	9	5	0	0	0	0	0	0	0	0	0	14
	Bacteria;;;Firmicutes;;Clostridia;;Clostridiales;;Lachnospiraceae;;AB606281_g;AB606281_g_uc	AB606281_g_uc	0.00646	0.01367	0	0.00671	0	0	0.02418	0.00539	0	0.02967	0	0.08608	1	2	0	1	0	0	4	1	0	5	0	14
	Bacteria;;;Firmicutes;;Erysipelotrichi;;Erysipelotrichales;;Coprobacillus_f;;Clostridium_g6;FJ372126_s	FJ372126_s	0	0	0	0	0.00651	0	0.01209	0.01617	0.00636	0.02374	0.01845	0.08332	0	0	0	0	1	0	2	3	1	4	3	14
	Bacteria;;;Firmicutes;;Bacilli;;Lactobacillales;;Streptococcaceae;;Streptococcus;Streptococcus canis	Streptococcus canis	0.07108	0.02051	0	0	0	0	0	0	0	0	0	0.09159	11	3	0	0	0	0	0	0	0	0	0	14
	Bacteria;;;Firmicutes;;Bacilli;;Lactobacillales;;Enterococcaceae;;Enterococcus;Enterococcus phoeniculicola	Enterococcus phoeniculicola	0.01939	0.02735	0	0	0	0	0	0	0	0.0356	0	0.08234	3	4	0	0	0	0	0	0	0	6	0	13
	Bacteria;;;Bacteroidetes;;Bacteroidia;;Bacteroidales;;Bacteroidaceae;;Bacteroides;HQ769184_s	HQ769184_s	0	0	0	0	0	0	0	0	0	0	0.07996	0.07996	0	0	0	0	0	0	0	0	0	0	13	13
	Bacteria;;;Firmicutes;;Clostridia;;Clostridiales;;Lachnospiraceae;;DQ115991_g;FJ681897_s	FJ681897_s	0.03877	0	0	0	0	0	0.04232	0	0	0	0	0.08109	6	0	0	0	0	0	7	0	0	0	0	13
	Bacteria;;;Firmicutes;;Clostridia;;Clostridiales;;Clostridiaceae;;Clostridium;Clostridium chauvoei	Clostridium chauvoei	0.07108	0.01367	0	0	0	0	0	0	0	0	0	0.08475	11	2	0	0	0	0	0	0	0	0	0	13
	Bacteria;;;Firmicutes;;Clostridia;;Clostridiales;;Lachnospiraceae;;Blautia;Blautia schinkii	Blautia schinkii	0	0	0.00765	0.03356	0.03904	0	0	0.00539	0	0	0	0.08564	0	0	1	5	6	0	0	1	0	0	0	13
	Bacteria;;;Firmicutes;;Clostridia;;Clostridiales;;Clostridiaceae;;Clostridium;AF371844_s	AF371844_s	0.00646	0.06837	0	0	0	0	0	0	0.00636	0	0.00615	0.08734	1	10	0	0	0	0	0	0	1	0	1	13
	Bacteria;;;Firmicutes;;Bacilli;;Lactobacillales;;Streptococcaceae;;Streptococcus;JN682029_s	JN682029_s	0.00646	0.07521	0	0	0	0	0	0	0	0	0	0.08167	1	11	0	0	0	0	0	0	0	0	0	12
	Bacteria;;;Firmicutes;;Clostridia;;Clostridiales;;Lachnospiraceae;;Blautia;DQ807633_s	DQ807633_s	0	0	0	0	0.00651	0	0	0.01617	0	0.04747	0	0.07015	0	0	0	0	1	0	0	3	0	8	0	12
	Bacteria;;;Firmicutes;;Clostridia;;Clostridiales;;Lachnospiraceae;;AB606281_g;AB606281_s	AB606281_s	0.00646	0	0	0.00671	0.00651	0.00709	0.00605	0	0	0.02374	0.01845	0.07501	1	0	0	1	1	1	1	0	0	4	3	12
	Bacteria;;;Firmicutes;;Erysipelotrichi;;Turicibacter_o;;Turicibacter_f;;Turicibacter_f_uc;Turicibacter_f_uc_s	Turicibacter_f_uc_s	0	0	0	0	0.00651	0	0.04836	0	0.00636	0.00593	0	0.06716	0	0	0	0	1	0	8	0	1	1	0	11
	Bacteria;;;Firmicutes;;Bacilli;;Lactobacillales;;Carnobacteriaceae;;Carnobacterium;Carnobacterium divergens	Carnobacterium divergens	0	0	0.0841	0	0	0	0	0	0	0	0	0.0841	0	0	11	0	0	0	0	0	0	0	0	11
	Bacteria;;;Firmicutes;;Clostridia;;Clostridiales;;Clostridiaceae;;Clostridium;AY337519_s	AY337519_s	0.01292	0.04786	0	0	0	0	0	0	0.00636	0.00593	0	0.07307	2	7	0	0	0	0	0	0	1	1	0	11
	Bacteria;;;Proteobacteria;;Gammaproteobacteria;;Aeromonadales;;Succinivibrionaceae;;Succinivibrio;Succinivibrio_uc	Succinivibrio_uc	0	0	0.07645	0	0	0	0	0	0	0	0	0.07645	0	0	10	0	0	0	0	0	0	0	0	10
	Bacteria;;;Firmicutes;;Clostridia;;Clostridiales;;Lachnospiraceae;;AB606383_g;AB606383_g_uc	AB606383_g_uc	0.01292	0	0	0	0.01301	0	0	0.02156	0	0.01187	0	0.05936	2	0	0	0	2	0	0	4	0	2	0	10
	Bacteria;;;Bacteroidetes;;Bacteroidia;;Bacteroidales;;Bacteroidaceae;;Bacteroides;EU475381_s	EU475381_s	0	0	0	0	0	0	0	0	0	0	0.06151	0.06151	0	0	0	0	0	0	0	0	0	0	10	10
	Bacteria;;;Firmicutes;;Negativicutes;;Selenomonadales;;Acidaminococcaceae;;Phascolarctobacterium;Phascolarctobacterium_uc	Phascolarctobacterium_uc	0	0	0.03058	0	0	0.04251	0	0	0	0	0	0.07309	0	0	4	0	0	6	0	0	0	0	0	10
	Bacteria;;;Firmicutes;;Bacilli;;Lactobacillales;;Lactobacillaceae;;Lactobacillus;EU510700_s	EU510700_s	0	0	0	0	0	0	0.06045	0	0	0	0	0.06045	0	0	0	0	0	0	10	0	0	0	0	10
	Bacteria;;;Firmicutes;;Clostridia;;Clostridiales;;Ruminococcaceae;;Caproiciproducens;HQ746494_s	HQ746494_s	0	0	0.04587	0.02014	0	0.00709	0	0	0	0	0	0.0731	0	0	6	3	0	1	0	0	0	0	0	10
	Bacteria;;;Actinobacteria;;Actinobacteria_c;;Actinomycetales;;Actinomycetaceae;;Actinomyces;Actinomyces_uc	Actinomyces_uc	0	0	0	0	0.00651	0.00709	0.01209	0.03233	0	0	0	0.05802	0	0	0	0	1	1	2	6	0	0	0	10
	Bacteria;;;Firmicutes;;Clostridia;;Clostridiales;;Lachnospiraceae;;Clostridium_g12;Eubacterium contortum	Eubacterium contortum	0	0	0	0	0	0	0	0.03233	0	0.02374	0	0.05607	0	0	0	0	0	0	0	6	0	4	0	10
	Bacteria;;;Firmicutes;;Clostridia;;Clostridiales;;Lachnospiraceae;;AB606383_g;AB606383_s	AB606383_s	0	0	0	0	0.01952	0	0	0.01617	0.00636	0.01187	0	0.05392	0	0	0	0	3	0	0	3	1	2	0	9
	Bacteria;;;Firmicutes;;Clostridia;;Clostridiales;;Lachnospiraceae;;EU794202_g;EU794202_g_uc	EU794202_g_uc	0.00646	0.00684	0.00765	0	0.01952	0	0.00605	0	0.01272	0	0	0.05924	1	1	1	0	3	0	1	0	2	0	0	9
	Bacteria;;;Firmicutes;;Clostridia;;Clostridiales;;Lachnospiraceae;;EU469747_g;EU469747_s	EU469747_s	0.00646	0	0.02294	0	0.01301	0	0.01209	0	0	0.00593	0	0.06043	1	0	3	0	2	0	2	0	0	1	0	9
	Bacteria;;;Firmicutes;;Clostridia;;Clostridiales;;Ruminococcaceae;;Butyricicoccus;Butyricicoccus_uc	Butyricicoccus_uc	0.01292	0.00684	0	0	0.01301	0.02126	0	0	0.00636	0	0	0.06039	2	1	0	0	2	3	0	0	1	0	0	9
	Bacteria;;;Firmicutes;;Clostridia;;Clostridiales;;Lachnospiraceae;;Ruminococcus_g4;Ruminococcus_g4_uc	Ruminococcus_g4_uc	0.01292	0	0	0.02014	0	0	0	0.00539	0	0.0178	0	0.05625	2	0	0	3	0	0	0	1	0	3	0	9
	Bacteria;;;Firmicutes;;Bacilli;;Lactobacillales;;Enterococcaceae;;Enterococcus;Enterococcus durans	Enterococcus durans	0	0	0	0	0	0	0	0	0	0.0178	0.0369	0.0547	0	0	0	0	0	0	0	0	0	3	6	9
	Bacteria;;;Firmicutes;;Clostridia;;Clostridiales;;Clostridium_g7_f;;Clostridium_g7;Clostridium_g7_uc	Clostridium_g7_uc	0	0	0	0	0	0	0	0.03772	0.01272	0	0	0.05044	0	0	0	0	0	0	0	7	2	0	0	9
	Bacteria;;;Firmicutes;;Clostridia;;Clostridiales;;Lachnospiraceae;;Hungatella;HQ779256_s	HQ779256_s	0	0	0	0	0.03253	0	0	0	0	0.02374	0	0.05627	0	0	0	0	5	0	0	0	0	4	0	9
	Bacteria;;;Firmicutes;;Clostridia;;Clostridiales;;Lachnospiraceae;;Clostridium_g23;GQ898310_s	GQ898310_s	0	0.01367	0	0.02685	0.00651	0.00709	0	0	0	0	0	0.05412	0	2	0	4	1	1	0	0	0	0	0	8
	Bacteria;;;Bacteroidetes;;Bacteroidia;;Bacteroidales;;Prevotellaceae;;Prevotella;HQ794817_s	HQ794817_s	0	0	0.04587	0	0	0.01417	0	0	0	0	0	0.06004	0	0	6	0	0	2	0	0	0	0	0	8
	Bacteria;;;Firmicutes;;Clostridia;;Clostridiales;;Epulopiscium_f;;Epulopiscium;AF371938_s	AF371938_s	0.01939	0.03419	0	0	0	0	0	0	0	0	0	0.05358	3	5	0	0	0	0	0	0	0	0	0	8
	Bacteria;;;Firmicutes;;Clostridia;;Clostridiales;;Lachnospiraceae;;Dorea;EU462842_s	EU462842_s	0	0.01367	0.01529	0.00671	0.01301	0	0	0	0.00636	0	0	0.05504	0	2	2	1	2	0	0	0	1	0	0	8
	Bacteria;;;Proteobacteria;;Gammaproteobacteria;;Enterobacteriales;;Enterobacteriales_uc;;Enterobacteriales_uc_g;Enterobacteriales_uc_s	Enterobacteriales_uc_s	0	0.00684	0	0.00671	0	0	0	0	0.01272	0.01187	0.0123	0.05044	0	1	0	1	0	0	0	0	2	2	2	8
	Bacteria;;;Firmicutes;;Clostridia;;Clostridiales;;Clostridiaceae;;Clostridium;EU467399_s	EU467399_s	0.00646	0.04786	0	0	0	0	0	0	0	0	0	0.05432	1	7	0	0	0	0	0	0	0	0	0	8
	Bacteria;;;Firmicutes;;Clostridia;;Clostridiales;;Peptostreptococcaceae;;Peptostreptococcus;AY581819_s	AY581819_s	0	0	0	0	0.05205	0	0	0	0	0	0	0.05205	0	0	0	0	8	0	0	0	0	0	0	8
	Bacteria;;;Firmicutes;;Clostridia;;Clostridiales;;Lachnospiraceae;;EF404752_g;EF404752_g_uc	EF404752_g_uc	0	0	0.00765	0	0.03253	0	0	0	0.00636	0.00593	0	0.05247	0	0	1	0	5	0	0	0	1	1	0	8
	Bacteria;;;Firmicutes;;Erysipelotrichi;;Erysipelotrichales;;Erysipelotrichales_uc;;Erysipelotrichales_uc_g;Erysipelotrichales_uc_s	Erysipelotrichales_uc_s	0	0	0	0	0.00651	0	0.00605	0.01617	0.00636	0	0.0123	0.04739	0	0	0	0	1	0	1	3	1	0	2	8
	Bacteria;;;Firmicutes;;Bacilli;;Lactobacillales;;Lactobacillaceae;;Lactobacillus;Lactobacillus gasseri	Lactobacillus gasseri	0	0	0	0	0	0	0.04232	0.00539	0	0	0	0.04771	0	0	0	0	0	0	7	1	0	0	0	8
	Bacteria;;;Firmicutes;;Clostridia;;Clostridiales;;Clostridiaceae;;Clostridium;Clostridium carnis	Clostridium carnis	0.00646	0.04102	0	0	0	0	0	0	0	0.00593	0	0.05341	1	6	0	0	0	0	0	0	0	1	0	8
	Bacteria;;;Proteobacteria;;Betaproteobacteria;;Burkholderiales;;Sutterella_f;;Parasutterella;Parasutterella excrementihominis	Parasutterella excrementihominis	0	0	0	0	0	0.05668	0	0	0	0	0	0.05668	0	0	0	0	0	8	0	0	0	0	0	8
	Bacteria;;;Firmicutes;;Erysipelotrichi;;Turicibacter_o;;Turicibacter_f;;Turicibacter;Turicibacter sanguinis	Turicibacter sanguinis	0.00646	0	0.00765	0.00671	0	0.02126	0	0	0.01272	0	0	0.0548	1	0	1	1	0	3	0	0	2	0	0	8
	Bacteria;;;Proteobacteria;;Gammaproteobacteria;;Enterobacteriales;;Enterobacteriaceae;;Escherichia;EU472782_s	EU472782_s	0	0	0	0	0	0	0	0	0.0318	0.00593	0.0123	0.05003	0	0	0	0	0	0	0	0	5	1	2	8
	Bacteria;;;Firmicutes;;Clostridia;;Clostridiales;;Lachnospiraceae;;Blautia;DQ796661_s	DQ796661_s	0	0.00684	0.02294	0	0.01301	0	0	0.01078	0	0	0	0.05357	0	1	3	0	2	0	0	2	0	0	0	8
	Bacteria;;;Bacteroidetes;;Bacteroidia;;Bacteroidales;;Bacteroidaceae;;Bacteroides;Bacteroides fragilis	Bacteroides fragilis	0.00646	0.03419	0	0	0	0	0.00605	0	0	0	0	0.0467	1	5	0	0	0	0	1	0	0	0	0	7
	Bacteria;;;Firmicutes;;Clostridia;;Clostridiales;;Lachnospiraceae;;Hespellia;Hespellia porcina	Hespellia porcina	0.00646	0	0	0.02014	0.00651	0.00709	0	0.00539	0	0	0	0.04559	1	0	0	3	1	1	0	1	0	0	0	7
	Bacteria;;;Firmicutes;;Clostridia;;Clostridiales;;Lachnospiraceae;;Clostridium_g21;Clostridium_g21_uc	Clostridium_g21_uc	0	0.01367	0.00765	0.01343	0	0.01417	0	0	0	0	0	0.04892	0	2	1	2	0	2	0	0	0	0	0	7
	Bacteria;;;Actinobacteria;;Actinobacteria_c;;Micrococcales;;Microbacteriaceae;;Klugiella;Klugiella xanthotipulae	Klugiella xanthotipulae	0	0	0	0.00671	0	0	0	0.02156	0	0	0.0123	0.04057	0	0	0	1	0	0	0	4	0	0	2	7
	Bacteria;;;Bacteroidetes;;Bacteroidia;;Bacteroidales;;Bacteroidaceae;;Bacteroides;JN559721_s	JN559721_s	0	0	0.05352	0	0	0	0	0	0	0	0	0.05352	0	0	7	0	0	0	0	0	0	0	0	7
	Bacteria;;;Firmicutes;;Bacilli;;Lactobacillales;;Lactobacillaceae;;Lactobacillus;Lactobacillus taiwanensis	Lactobacillus taiwanensis	0	0	0	0	0	0	0.04232	0	0	0	0	0.04232	0	0	0	0	0	0	7	0	0	0	0	7
	Bacteria;;;Actinobacteria;;Actinobacteria_c;;Bifidobacteriales;;Bifidobacteriaceae;;Bifidobacteriaceae_uc;Bifidobacteriaceae_uc_s	Bifidobacteriaceae_uc_s	0	0	0	0	0	0	0.03627	0	0	0	0.00615	0.04242	0	0	0	0	0	0	6	0	0	0	1	7
	Bacteria;;;Firmicutes;;Bacilli;;Bacillales;;Staphylococcaceae;;Staphylococcus;Staphylococcus intermedius group	Staphylococcus intermedius group	0	0	0	0	0	0	0	0.03233	0.00636	0	0	0.03869	0	0	0	0	0	0	0	6	1	0	0	7
	Bacteria;;;Firmicutes;;Bacilli;;Lactobacillales;;Lactobacillaceae;;Lactobacillus;EU453654_s	EU453654_s	0	0	0	0	0	0	0.03627	0	0	0	0	0.03627	0	0	0	0	0	0	6	0	0	0	0	6
	Bacteria;;;Proteobacteria;;Gammaproteobacteria;;Enterobacteriales;;Enterobacteriaceae;;Pantoea;Pantoea eucrina	Pantoea eucrina	0	0	0	0	0	0	0	0	0	0	0.0369	0.0369	0	0	0	0	0	0	0	0	0	0	6	6
	Bacteria;;;Bacteroidetes;;Bacteroidia;;Bacteroidales;;Bacteroidaceae;;Bacteroides;JN559522_s	JN559522_s	0.03231	0	0	0	0.00651	0	0	0	0	0	0	0.03882	5	0	0	0	1	0	0	0	0	0	0	6
	Bacteria;;;Bacteroidetes;;Bacteroidia;;Bacteroidia_uc;;Bacteroidia_uc_f;;Bacteroidia_uc_g;Bacteroidia_uc_s	Bacteroidia_uc_s	0	0	0.00765	0.00671	0	0.00709	0	0	0.01908	0	0	0.04053	0	0	1	1	0	1	0	0	3	0	0	6
	Bacteria;;;Firmicutes;;Clostridia;;Clostridiales;;Lachnospiraceae;;Clostridium_g21;JQ084407_s	JQ084407_s	0	0.02735	0	0	0.00651	0	0.00605	0	0	0	0	0.03991	0	4	0	0	1	0	1	0	0	0	0	6
	Bacteria;;;Bacteroidetes;;Bacteroidia;;Bacteroidales;;Bacteroidaceae;;Bacteroides;AB599946_s	AB599946_s	0	0	0	0	0	0.04251	0	0	0	0	0	0.04251	0	0	0	0	0	6	0	0	0	0	0	6
	Bacteria;;;Actinobacteria;;Coriobacteriia;;Coriobacteriales;;Coriobacteriales_uc;;Coriobacteriales_uc_g;Coriobacteriales_uc_s	Coriobacteriales_uc_s	0	0	0.01529	0.02685	0	0	0	0	0	0	0	0.04214	0	0	2	4	0	0	0	0	0	0	0	6
	Bacteria;;;Firmicutes;;Clostridia;;Clostridiales;;Lachnospiraceae;;Hespellia;Hespellia_uc	Hespellia_uc	0	0	0.01529	0.01343	0.00651	0	0	0	0	0.00593	0	0.04116	0	0	2	2	1	0	0	0	0	1	0	6
	Bacteria;;;Firmicutes;;Clostridia;;Clostridiales;;Ruminococcaceae;;EU381725_g;EU462785_s	EU462785_s	0	0	0	0.04028	0	0	0	0	0	0	0	0.04028	0	0	0	6	0	0	0	0	0	0	0	6
	Bacteria;;;Firmicutes;;Clostridia;;Clostridiales;;Ruminococcaceae;;Caproiciproducens;Caproiciproducens_uc	Caproiciproducens_uc	0	0	0	0	0	0.00709	0.00605	0	0	0	0.0246	0.03774	0	0	0	0	0	1	1	0	0	0	4	6
	Bacteria;;;Bacteroidetes;;Bacteroidia;;Bacteroidales;;Prevotellaceae;;Prevotella;EU462268_s	EU462268_s	0	0	0.04587	0	0	0	0	0	0	0	0	0.04587	0	0	6	0	0	0	0	0	0	0	0	6
	Bacteria;;;Firmicutes;;Clostridia;;Clostridiales;;Lachnospiraceae;;Blautia;FJ880520_s	FJ880520_s	0	0	0.01529	0	0.00651	0	0	0.01617	0	0	0	0.03797	0	0	2	0	1	0	0	3	0	0	0	6
	Bacteria;;;Firmicutes;;Clostridia;;Clostridiales;;Lachnospiraceae;;Blautia;Blautia luti	Blautia luti	0	0	0.01529	0.00671	0.00651	0	0	0.01078	0	0	0	0.03929	0	0	2	1	1	0	0	2	0	0	0	6
	Bacteria;;;Firmicutes;;Clostridia;;Clostridiales;;Lachnospiraceae;;Ruminococcus_g4;Ruminococcus torques	Ruminococcus torques	0.00646	0	0	0.00671	0	0	0	0.01078	0	0.01187	0	0.03582	1	0	0	1	0	0	0	2	0	2	0	6
	Bacteria;;;Proteobacteria;;Gammaproteobacteria;;Enterobacteriales;;Enterobacteriaceae;;Klebsiella;Klebsiella_uc	Klebsiella_uc	0	0	0	0	0	0	0	0	0	0	0.0369	0.0369	0	0	0	0	0	0	0	0	0	0	6	6
	Bacteria;;;Firmicutes;;Clostridia;;Clostridiales;;Lachnospiraceae;;Blautia;JX096298_s	JX096298_s	0	0	0	0.02685	0.00651	0	0	0.00539	0	0	0	0.03875	0	0	0	4	1	0	0	1	0	0	0	6
	Bacteria;;;Fusobacteria;;Fusobacteria_c;;Fusobacteriales;;Fusobacteriaceae;;Fusobacterium;Fusobacterium necrogenes	Fusobacterium necrogenes	0	0.00684	0.00765	0.00671	0	0.02126	0	0	0	0	0	0.04246	0	1	1	1	0	3	0	0	0	0	0	6
	Bacteria;;;Actinobacteria;;Actinobacteria_c;;Bifidobacteriales;;Bifidobacteriaceae;;Bifidobacterium;CP007456_s	CP007456_s	0	0	0	0	0	0	0.03627	0	0	0	0	0.03627	0	0	0	0	0	0	6	0	0	0	0	6
	Bacteria;;;Firmicutes;;Erysipelotrichi;;Erysipelotrichales;;Coprobacillus_f;;Clostridium_g6;HQ743770_s	HQ743770_s	0	0	0	0.04028	0	0	0	0	0	0	0	0.04028	0	0	0	6	0	0	0	0	0	0	0	6
	Bacteria;;;Firmicutes;;Clostridia;;Clostridiales;;Lachnospiraceae;;Blautia;DQ807050_s	DQ807050_s	0	0	0	0.00671	0.02602	0	0	0	0.00636	0	0	0.03909	0	0	0	1	4	0	0	0	1	0	0	6
	Bacteria;;;Firmicutes;;Bacilli;;Lactobacillales;;Lactobacillaceae;;Lactobacillus;Lactobacillus fermentum	Lactobacillus fermentum	0	0	0	0	0	0	0.03627	0	0	0	0	0.03627	0	0	0	0	0	0	6	0	0	0	0	6
	Bacteria;;;Firmicutes;;Clostridia;;Clostridiales;;Peptostreptococcaceae;;Clostridium_g4;Clostridium bifermentans	Clostridium bifermentans	0	0	0	0	0.03904	0	0	0	0	0	0	0.03904	0	0	0	0	6	0	0	0	0	0	0	6
	Bacteria;;;Firmicutes;;Clostridia;;Clostridiales;;Ruminococcaceae;;Ruminococcus;EU775317_s	EU775317_s	0	0	0	0	0.03904	0	0	0	0	0	0	0.03904	0	0	0	0	6	0	0	0	0	0	0	6
	Bacteria;;;Firmicutes;;Clostridia;;Clostridiales;;Lachnospiraceae;;Blautia;DQ807741_s	DQ807741_s	0	0	0	0.00671	0	0	0	0.01078	0	0.01187	0	0.02936	0	0	0	1	0	0	0	2	0	2	0	5
	Bacteria;;;Proteobacteria;;Betaproteobacteria;;Neisseriales;;Neisseriaceae;;Neisseriaceae_uc;Neisseriaceae_uc_s	Neisseriaceae_uc_s	0	0	0	0	0	0	0.01814	0	0.00636	0.00593	0	0.03043	0	0	0	0	0	0	3	0	1	1	0	5
	Bacteria;;;Proteobacteria;;Epsilonproteobacteria;;Campylobacterales;;Campylobacteraceae;;Campylobacter;Campylobacter jejuni group	Campylobacter jejuni group	0	0	0	0	0	0.03543	0	0	0	0	0	0.03543	0	0	0	0	0	5	0	0	0	0	0	5
	Bacteria;;;Firmicutes;;Clostridia;;Clostridiales;;Lachnospiraceae;;Eisenbergiella;DQ905770_s	DQ905770_s	0.03231	0	0	0	0	0	0	0	0	0	0	0.03231	5	0	0	0	0	0	0	0	0	0	0	5
	Bacteria;;;Firmicutes;;Clostridia;;Clostridiales;;Lachnospiraceae;;Coprococcus_g2;EU776475_s	EU776475_s	0.01939	0.00684	0	0.00671	0	0	0	0	0	0	0	0.03294	3	1	0	1	0	0	0	0	0	0	0	5
	Bacteria;;;Bacteroidetes;;Bacteroidia;;Bacteroidales;;Prevotellaceae;;Prevotella;Prevotella copri	Prevotella copri	0	0	0.03823	0	0	0	0	0	0	0	0	0.03823	0	0	5	0	0	0	0	0	0	0	0	5
	Bacteria;;;Bacteroidetes;;Bacteroidia;;Bacteroidales;;Bacteroidaceae;;Bacteroides;AY986231_s	AY986231_s	0	0	0	0	0	0	0	0	0	0	0.03075	0.03075	0	0	0	0	0	0	0	0	0	0	5	5
	Bacteria;;;Fusobacteria;;Fusobacteria_c;;Fusobacteria_c_uc;;Fusobacteria_c_uc_f;;Fusobacteria_c_uc_g;Fusobacteria_c_uc_s	Fusobacteria_c_uc_s	0	0.01367	0.02294	0	0	0	0	0	0	0	0	0.03661	0	2	3	0	0	0	0	0	0	0	0	5
	Bacteria;;;Firmicutes;;Clostridia;;Clostridiales;;Ruminococcaceae;;Pseudoflavonifractor;Pseudoflavonifractor_uc	Pseudoflavonifractor_uc	0	0	0	0	0	0.03543	0	0	0	0	0	0.03543	0	0	0	0	0	5	0	0	0	0	0	5
	Bacteria;;;Firmicutes;;Bacilli;;Lactobacillales;;Aerococcaceae;;Aerococcaceae_uc;Aerococcaceae_uc_s	Aerococcaceae_uc_s	0	0.00684	0	0	0	0	0.00605	0	0.01272	0	0.00615	0.03176	0	1	0	0	0	0	1	0	2	0	1	5
	Bacteria;;;Firmicutes;;Clostridia;;Clostridiales;;Lachnospiraceae;;Blautia;EU463003_s	EU463003_s	0	0	0.00765	0.00671	0.01952	0	0	0	0	0	0	0.03388	0	0	1	1	3	0	0	0	0	0	0	5
	Bacteria;;;Actinobacteria;;Actinobacteria_c;;Micrococcales;;Microbacteriaceae;;Canibacter;Canibacter oris	Canibacter oris	0	0	0	0.00671	0.00651	0	0	0	0	0.00593	0.0123	0.03145	0	0	0	1	1	0	0	0	0	1	2	5
	Bacteria;;;Firmicutes;;Clostridia;;Clostridiales;;Lachnospiraceae;;Clostridium_g12;Clostridium oroticum	Clostridium oroticum	0.00646	0	0	0.01343	0.01301	0	0	0	0	0	0	0.0329	1	0	0	2	2	0	0	0	0	0	0	5
	Bacteria;;;Firmicutes;;Clostridia;;Clostridiales;;Lachnospiraceae;;GQ451310_g;GQ451310_g_uc	GQ451310_g_uc	0.00646	0	0.00765	0.00671	0	0	0	0	0	0.01187	0	0.03269	1	0	1	1	0	0	0	0	0	2	0	5
	Bacteria;;;Firmicutes;;Bacilli;;Lactobacillales;;Streptococcaceae;;Lactococcus;Lactococcus lactis group	Lactococcus lactis group	0	0.02735	0	0.00671	0	0	0	0	0	0	0	0.03406	0	4	0	1	0	0	0	0	0	0	0	5
	Bacteria;;;Actinobacteria;;Actinobacteria_c;;Actinomycetales;;Actinomycetaceae;;Actinomyces;Actinomyces canis	Actinomyces canis	0	0	0.00765	0	0.00651	0	0	0.00539	0	0.00593	0.00615	0.03163	0	0	1	0	1	0	0	1	0	1	1	5
	Bacteria;;;Proteobacteria;;Gammaproteobacteria;;Aeromonadales;;Succinivibrionaceae;;Succinivibrionaceae_uc;Succinivibrionaceae_uc_s	Succinivibrionaceae_uc_s	0	0	0.03058	0.00671	0	0	0	0	0	0	0	0.03729	0	0	4	1	0	0	0	0	0	0	0	5
	Bacteria;;;Firmicutes;;Erysipelotrichi;;Erysipelotrichales;;Allobaculum_f;;Eubacterium_g1;HQ803163_s	HQ803163_s	0	0	0	0	0	0	0	0	0	0.00593	0.0246	0.03053	0	0	0	0	0	0	0	0	0	1	4	5
	Bacteria;;;Firmicutes;;Erysipelotrichi;;Turicibacter_o;;Turicibacter_f;;Turicibacter;Turicibacter_uc	Turicibacter_uc	0	0	0.00765	0	0.00651	0.00709	0.00605	0	0	0.00593	0	0.03323	0	0	1	0	1	1	1	0	0	1	0	5
	Bacteria;;;Proteobacteria;;Betaproteobacteria;;Burkholderiales;;Sutterella_f;;Sutterella;FJ680276_s	FJ680276_s	0	0	0.01529	0	0.01952	0	0	0	0	0	0	0.03481	0	0	2	0	3	0	0	0	0	0	0	5
	Bacteria;;;Firmicutes;;Clostridia;;Clostridiales;;Lachnospiraceae;;Ruminococcus_g5;Ruminococcus faecis	Ruminococcus faecis	0	0	0	0.02685	0.00651	0	0	0	0	0	0	0.03336	0	0	0	4	1	0	0	0	0	0	0	5
	Bacteria;;;Proteobacteria;;Gammaproteobacteria;;Enterobacteriales;;Enterobacteriaceae;;Escherichia;Escherichia marmotae	Escherichia marmotae	0.00646	0	0	0	0.00651	0	0	0	0	0.00593	0.00615	0.02505	1	0	0	0	1	0	0	0	0	1	1	4
	Bacteria;;;Firmicutes;;Bacilli;;Lactobacillales;;Lactobacillaceae;;Lactobacillus;FJ975803_s	FJ975803_s	0	0	0	0	0	0	0.02418	0	0	0	0	0.02418	0	0	0	0	0	0	4	0	0	0	0	4
	Bacteria;;;Firmicutes;;Clostridia;;Clostridiales;;Lachnospiraceae;;Eisenbergiella;JPNB_s	JPNB_s	0.02585	0	0	0	0	0	0	0	0	0	0	0.02585	4	0	0	0	0	0	0	0	0	0	0	4
	Bacteria;;;Firmicutes;;Clostridia;;Clostridiales;;Lachnospiraceae;;DQ115991_g;DQ115991_g_uc	DQ115991_g_uc	0.01292	0	0	0	0	0	0	0	0.00636	0.00593	0	0.02521	2	0	0	0	0	0	0	0	1	1	0	4
	Bacteria;;;Actinobacteria;;Actinobacteria_c;;Bifidobacteriales;;Bifidobacteriaceae;;Bifidobacterium;Bifidobacterium pseudolongum group	Bifidobacterium pseudolongum group	0.00646	0.02051	0	0	0	0	0	0	0	0	0	0.02697	1	3	0	0	0	0	0	0	0	0	0	4
	Bacteria;;;Firmicutes;;Clostridia;;Clostridiales;;Lachnospiraceae;;Dorea;FJ880297_s	FJ880297_s	0	0	0.00765	0	0.01952	0	0	0	0	0	0	0.02717	0	0	1	0	3	0	0	0	0	0	0	4
	Bacteria;;;Firmicutes;;Bacilli;;Bacillales;;Bacillales_uc;;Bacillales_uc_g;Bacillales_uc_s	Bacillales_uc_s	0	0	0	0.01343	0	0	0.01209	0	0	0	0	0.02552	0	0	0	2	0	0	2	0	0	0	0	4
	Bacteria;;;Firmicutes;;Bacilli;;Lactobacillales;;Enterococcaceae;;Enterococcus;Enterococcus rivorum	Enterococcus rivorum	0	0	0	0	0	0	0.00605	0	0	0	0.01845	0.0245	0	0	0	0	0	0	1	0	0	0	3	4
	Bacteria;;;Firmicutes;;Bacilli;;Bacilli_uc;;Bacilli_uc_f;;Bacilli_uc_g;Bacilli_uc_s	Bacilli_uc_s	0	0	0	0	0.00651	0	0.00605	0	0.01272	0	0	0.02528	0	0	0	0	1	0	1	0	2	0	0	4
	Bacteria;;;Proteobacteria;;Betaproteobacteria;;Burkholderiales;;Ralstonia_f;;Ralstonia;AM713401_s	AM713401_s	0	0	0	0	0	0	0.00605	0.01078	0	0	0.00615	0.02298	0	0	0	0	0	0	1	2	0	0	1	4
	Bacteria;;;Firmicutes;;Bacilli;;Lactobacillales;;Lactobacillaceae;;Lactobacillus;Lactobacillus hominis	Lactobacillus hominis	0	0	0	0	0	0	0.02418	0	0	0	0	0.02418	0	0	0	0	0	0	4	0	0	0	0	4
	Bacteria;;;Firmicutes;;Clostridia;;Clostridiales;;Lachnospiraceae;;Blautia;EU463011_s	EU463011_s	0	0	0	0.00671	0	0	0	0	0.00636	0.01187	0	0.02494	0	0	0	1	0	0	0	0	1	2	0	4
	Bacteria;;;Firmicutes;;Clostridia;;Clostridiales;;Lachnospiraceae;;Butyrivibrio_g1;Butyrivibrio_g1_uc	Butyrivibrio_g1_uc	0.00646	0.00684	0	0	0	0.00709	0.00605	0	0	0	0	0.02644	1	1	0	0	0	1	1	0	0	0	0	4
	Bacteria;;;Firmicutes;;Clostridia;;Clostridiales;;Clostridiaceae;;Clostridium;DQ196631_s	DQ196631_s	0	0.00684	0	0	0	0	0	0	0.01272	0.00593	0	0.02549	0	1	0	0	0	0	0	0	2	1	0	4
	Bacteria;;;Firmicutes;;Clostridia;;Clostridiales;;Lachnospiraceae;;Hungatella;DQ904718_s	DQ904718_s	0	0.00684	0	0.00671	0.01301	0	0	0	0	0	0	0.02656	0	1	0	1	2	0	0	0	0	0	0	4
	Bacteria;;;Proteobacteria;;Epsilonproteobacteria;;Campylobacterales;;Helicobacteraceae;;Helicobacter;Helicobacter cinaedi	Helicobacter cinaedi	0	0.02735	0	0	0	0	0	0	0	0	0	0.02735	0	4	0	0	0	0	0	0	0	0	0	4
	Bacteria;;;Firmicutes;;Clostridia;;Clostridiales;;Natranaerovirga_f;;Natranaerovirga_f_uc;Natranaerovirga_f_uc_s	Natranaerovirga_f_uc_s	0.00646	0	0	0.01343	0	0	0	0	0	0.00593	0	0.02582	1	0	0	2	0	0	0	0	0	1	0	4
	Bacteria;;;Proteobacteria;;Epsilonproteobacteria;;Campylobacterales;;Helicobacteraceae;;Helicobacter;Helicobacter bilis	Helicobacter bilis	0.02585	0	0	0	0	0	0	0	0	0	0	0.02585	4	0	0	0	0	0	0	0	0	0	0	4
	Bacteria;;;Firmicutes;;Clostridia;;Clostridiales;;Lachnospiraceae;;EU794202_g;EU794202_s	EU794202_s	0	0	0	0	0.02602	0	0	0	0	0	0	0.02602	0	0	0	0	4	0	0	0	0	0	0	4
	Bacteria;;;Firmicutes;;Clostridia;;Clostridiales;;Lachnospiraceae;;Hungatella;HQ176118_s	HQ176118_s	0	0	0	0	0.01301	0	0	0.00539	0	0.00593	0	0.02433	0	0	0	0	2	0	0	1	0	1	0	4
	Bacteria;;;Firmicutes;;Erysipelotrichi;;Erysipelotrichales;;Coprobacillus_f;;Clostridium_g6;Clostridium saccharogumia	Clostridium saccharogumia	0	0	0	0	0	0	0.00605	0.01078	0	0	0.00615	0.02298	0	0	0	0	0	0	1	2	0	0	1	4
	Bacteria;;;Firmicutes;;Clostridia;;Clostridiales;;Lachnospiraceae;;DQ057459_g;DQ804370_s	DQ804370_s	0	0	0	0	0.00651	0	0	0	0	0.01187	0.00615	0.02453	0	0	0	0	1	0	0	0	0	2	1	4
	Bacteria;;;Firmicutes;;Bacilli;;Bacillales;;Bacillaceae;;Bacillaceae_uc;Bacillaceae_uc_s	Bacillaceae_uc_s	0	0.00684	0	0.01343	0	0	0	0	0	0	0.00615	0.02642	0	1	0	2	0	0	0	0	0	0	1	4
	Bacteria;;;Firmicutes;;Bacilli;;Lactobacillales;;Lactobacillaceae;;Lactobacillus;Lactobacillus crispatus	Lactobacillus crispatus	0	0	0	0	0	0	0.01814	0	0	0	0	0.01814	0	0	0	0	0	0	3	0	0	0	0	3
	Bacteria;;;Firmicutes;;Clostridia;;Clostridiales;;Lachnospiraceae;;Blautia;EU461602_s	EU461602_s	0	0	0	0	0.01301	0	0	0.00539	0	0	0	0.0184	0	0	0	0	2	0	0	1	0	0	0	3
	Bacteria;;;Proteobacteria;;Gammaproteobacteria;;Enterobacteriales;;Enterobacteriaceae;;Pantoea;Pantoea_uc	Pantoea_uc	0	0	0	0	0	0	0	0	0	0	0.01845	0.01845	0	0	0	0	0	0	0	0	0	0	3	3
	Bacteria;;;Proteobacteria;;Alphaproteobacteria;;Rhizobiales;;Methylobacteriaceae;;Methylobacterium;Methylobacterium phyllostachyos	Methylobacterium phyllostachyos	0	0	0	0	0	0	0	0.01617	0	0	0	0.01617	0	0	0	0	0	0	0	3	0	0	0	3
	Bacteria;;;Firmicutes;;Bacilli;;Lactobacillales;;Streptococcaceae;;Streptococcus;Streptococcus minor	Streptococcus minor	0.01939	0	0	0	0	0	0	0	0	0	0	0.01939	3	0	0	0	0	0	0	0	0	0	0	3
	Bacteria;;;Firmicutes;;Clostridia;;Clostridiales;;Clostridiaceae;;Anaerobacter;EF088329_s	EF088329_s	0	0.02051	0	0	0	0	0	0	0	0	0	0.02051	0	3	0	0	0	0	0	0	0	0	0	3
	Bacteria;;;Firmicutes;;Bacilli;;Lactobacillales;;Streptococcaceae;;Streptococcus;Streptococcus mutans	Streptococcus mutans	0	0	0	0	0	0	0.01814	0	0	0	0	0.01814	0	0	0	0	0	0	3	0	0	0	0	3
	Bacteria;;;Actinobacteria;;Coriobacteriia;;Coriobacteriales;;Coriobacteriaceae;;Slackia;Slackia_uc	Slackia_uc	0	0	0	0	0.01952	0	0	0	0	0	0	0.01952	0	0	0	0	3	0	0	0	0	0	0	3
	Bacteria;;;Firmicutes;;Clostridia;;Clostridiales;;Peptostreptococcaceae;;Terrisporobacter;Terrisporobacter glycolicus	Terrisporobacter glycolicus	0.00646	0	0	0	0	0	0	0	0.01272	0	0	0.01918	1	0	0	0	0	0	0	0	2	0	0	3
	Bacteria;;;Firmicutes;;Clostridia;;Clostridiales;;Clostridiaceae;;Clostridium;Eubacterium moniliforme	Eubacterium moniliforme	0	0.01367	0	0	0	0	0	0	0	0.00593	0	0.0196	0	2	0	0	0	0	0	0	0	1	0	3
	Bacteria;;;Actinobacteria;;Coriobacteriia;;Coriobacteriales;;Coriobacteriaceae;;Atopobium;KE150487_s	KE150487_s	0	0	0	0	0	0	0.01814	0	0	0	0	0.01814	0	0	0	0	0	0	3	0	0	0	0	3
	Bacteria;;;Firmicutes;;Clostridia;;Clostridiales;;Lachnospiraceae;;Ruminococcus_g4;AJ315979_s	AJ315979_s	0	0	0	0	0.00651	0	0	0.01078	0	0	0	0.01729	0	0	0	0	1	0	0	2	0	0	0	3
	Bacteria;;;Firmicutes;;Bacilli;;Lactobacillales;;Enterococcaceae;;Enterococcus;Enterococcus faecalis	Enterococcus faecalis	0.00646	0	0	0	0.00651	0	0	0.00539	0	0	0	0.01836	1	0	0	0	1	0	0	1	0	0	0	3
	Bacteria;;;Firmicutes;;Bacilli;;Gemella_o;;Gemella_f;;Gemella;Gemella palaticanis	Gemella palaticanis	0.00646	0	0.00765	0	0.00651	0	0	0	0	0	0	0.02062	1	0	1	0	1	0	0	0	0	0	0	3
	Bacteria;;;Actinobacteria;;Actinobacteria_c;;Corynebacteriales;;Corynebacteriaceae;;Corynebacterium;Corynebacterium mustelae	Corynebacterium mustelae	0	0	0.00765	0.01343	0	0	0	0	0	0	0	0.02108	0	0	1	2	0	0	0	0	0	0	0	3
	Bacteria;;;Firmicutes;;Clostridia;;Clostridiales;;Lachnospiraceae;;Hungatella;JQ084876_s	JQ084876_s	0	0	0.00765	0	0.01301	0	0	0	0	0	0	0.02066	0	0	1	0	2	0	0	0	0	0	0	3
	Bacteria;;;Firmicutes;;Clostridia;;Clostridiales;;Lachnospiraceae;;Blautia;EU462815_s	EU462815_s	0	0	0	0	0.00651	0	0	0.00539	0	0.00593	0	0.01783	0	0	0	0	1	0	0	1	0	1	0	3
	Bacteria;;;Actinobacteria;;Actinobacteria_c;;Propionibacteriales;;Propionibacteriaceae;;Propionibacterium;JN713463_s	JN713463_s	0.00646	0	0	0	0	0	0	0.01078	0	0	0	0.01724	1	0	0	0	0	0	0	2	0	0	0	3
	Bacteria;;;Firmicutes;;Erysipelotrichi;;Erysipelotrichales;;Coprobacillus_f;;Clostridium_g6;FJ367839_s	FJ367839_s	0	0	0	0	0	0	0	0.00539	0	0.01187	0	0.01726	0	0	0	0	0	0	0	1	0	2	0	3
	Bacteria;;;Firmicutes;;Clostridia;;Clostridiales;;Lachnospiraceae;;Lactonifactor;Lactonifactor longoviformis	Lactonifactor longoviformis	0	0.00684	0	0	0.01301	0	0	0	0	0	0	0.01985	0	1	0	0	2	0	0	0	0	0	0	3
	Bacteria;;;Bacteroidetes;;Bacteroidia;;Bacteroidales;;Bacteroidaceae;;Bacteroides;Bacteroides caccae	Bacteroides caccae	0	0	0	0	0	0	0	0.00539	0	0	0.0123	0.01769	0	0	0	0	0	0	0	1	0	0	2	3
	Bacteria;;;Firmicutes;;Clostridia;;Clostridiales;;Lachnospiraceae;;GQ898349_g;EU459764_s	EU459764_s	0	0	0	0.01343	0.00651	0	0	0	0	0	0	0.01994	0	0	0	2	1	0	0	0	0	0	0	3
	Bacteria;;;Actinobacteria;;Actinobacteria_c;;Actinomycetales;;Actinomycetaceae;;Actinomyces;Actinomyces naeslundii	Actinomyces naeslundii	0	0	0	0	0	0	0	0.01617	0	0	0	0.01617	0	0	0	0	0	0	0	3	0	0	0	3
	Bacteria;;;Firmicutes;;Bacilli;;Bacillales;;Staphylococcaceae;;Macrococcus;Macrococcus equipercicus	Macrococcus equipercicus	0.00646	0.01367	0	0	0	0	0	0	0	0	0	0.02013	1	2	0	0	0	0	0	0	0	0	0	3
	Bacteria;;;Firmicutes;;Bacilli;;Lactobacillales;;Lactobacillaceae;;Lactobacillus;FN667084_s	FN667084_s	0	0	0	0	0	0	0.01814	0	0	0	0	0.01814	0	0	0	0	0	0	3	0	0	0	0	3
	Bacteria;;;Firmicutes;;Clostridia;;Clostridiales;;Lachnospiraceae;;GQ898349_g;EU462959_s	EU462959_s	0.00646	0	0	0.00671	0	0	0	0.00539	0	0	0	0.01856	1	0	0	1	0	0	0	1	0	0	0	3
	Bacteria;;;Firmicutes;;Clostridia;;Clostridiales;;Lachnospiraceae;;EF404752_g;EU774799_s	EU774799_s	0	0	0	0	0	0	0	0	0.01272	0.00593	0	0.01865	0	0	0	0	0	0	0	0	2	1	0	3
	Bacteria;;;Fusobacteria;;Fusobacteria_c;;Fusobacteriales;;Fusobacteriaceae;;Fusobacterium;EU289064_s	EU289064_s	0	0	0.02294	0	0	0	0	0	0	0	0	0.02294	0	0	3	0	0	0	0	0	0	0	0	3
	Bacteria;;;Firmicutes;;Bacilli;;Lactobacillales;;Streptococcaceae;;Streptococcus;Streptococcus fryi	Streptococcus fryi	0	0	0	0	0.00651	0	0.00605	0	0	0.00593	0	0.01849	0	0	0	0	1	0	1	0	0	1	0	3
	Bacteria;;;Firmicutes;;Clostridia;;Clostridiales;;Peptostreptococcaceae;;Peptostreptococcus;Peptostreptococcus canis	Peptostreptococcus canis	0	0	0	0	0	0	0.00605	0.01078	0	0	0	0.01683	0	0	0	0	0	0	1	2	0	0	0	3
	Bacteria;;;Firmicutes;;Clostridia;;Clostridiales;;Lachnospiraceae;;HM123979_g;HM123979_g_uc	HM123979_g_uc	0	0	0	0.00671	0	0	0.00605	0	0	0.00593	0	0.01869	0	0	0	1	0	0	1	0	0	1	0	3
	Bacteria;;;Firmicutes;;Clostridia;;Clostridiales;;Clostridiaceae;;Clostridium;Clostridium quinii	Clostridium quinii	0.01292	0	0	0	0	0	0	0	0.00636	0	0	0.01928	2	0	0	0	0	0	0	0	1	0	0	3
	Bacteria;;;Bacteroidetes;;Bacteroidia;;Bacteroidales;;Bacteroidaceae;;Bacteroides;HQ789766_s	HQ789766_s	0	0.02051	0	0	0	0	0	0	0	0	0	0.02051	0	3	0	0	0	0	0	0	0	0	0	3
	Bacteria;;;Firmicutes;;Bacilli;;Bacillales;;Listeriaceae;;Listeriaceae_uc;Listeriaceae_uc_s	Listeriaceae_uc_s	0	0	0	0.02014	0	0	0	0	0	0	0	0.02014	0	0	0	3	0	0	0	0	0	0	0	3
	Bacteria;;;Proteobacteria;;Gammaproteobacteria;;Enterobacteriales;;Enterobacteriaceae;;Enterobacter;JYMH_s	JYMH_s	0	0	0	0	0	0	0	0	0	0	0.01845	0.01845	0	0	0	0	0	0	0	0	0	0	3	3
	Bacteria;;;Bacteroidetes;;Bacteroidia;;Bacteroidales;;Bacteroidaceae;;Bacteroides;EF071154_s	EF071154_s	0	0	0.02294	0	0	0	0	0	0	0	0	0.02294	0	0	3	0	0	0	0	0	0	0	0	3
	Bacteria;;;Firmicutes;;Clostridia;;Clostridiales;;Ruminococcaceae;;Oscillibacter;HQ716212_s	HQ716212_s	0	0	0.02294	0	0	0	0	0	0	0	0	0.02294	0	0	3	0	0	0	0	0	0	0	0	3
	Bacteria;;;Proteobacteria;;Deltaproteobacteria;;Desulfovibrionales;;Desulfovibrionaceae;;Bilophila;Bilophila wadsworthia	Bilophila wadsworthia	0	0	0	0.00671	0	0	0.00605	0	0	0	0	0.01276	0	0	0	1	0	0	1	0	0	0	0	2
	Bacteria;;;Firmicutes;;Clostridia;;Clostridiales;;Lachnospiraceae;;EU777865_g;EU777865_g_uc	EU777865_g_uc	0	0.00684	0	0	0.00651	0	0	0	0	0	0	0.01335	0	1	0	0	1	0	0	0	0	0	0	2
	Bacteria;;;Bacteroidetes;;Bacteroidia;;Bacteroidales;;Bacteroidaceae;;Bacteroides;HQ757121_s	HQ757121_s	0	0	0	0	0	0.01417	0	0	0	0	0	0.01417	0	0	0	0	0	2	0	0	0	0	0	2
	Bacteria;;;Actinobacteria;;Actinobacteria_c;;Bifidobacteriales;;Bifidobacteriaceae;;Bifidobacterium;Bifidobacterium callitrichos	Bifidobacterium callitrichos	0.00646	0	0.00765	0	0	0	0	0	0	0	0	0.01411	1	0	1	0	0	0	0	0	0	0	0	2
	Bacteria;;;Firmicutes;;Firmicutes_uc;;Firmicutes_uc_o;;Firmicutes_uc_f;;Firmicutes_uc_g;Firmicutes_uc_s	Firmicutes_uc_s	0	0	0.00765	0	0	0	0	0	0.00636	0	0	0.01401	0	0	1	0	0	0	0	0	1	0	0	2
	Bacteria;;;Firmicutes;;Clostridia;;Clostridiales;;Clostridium_g7_f;;Clostridium_g7_f_uc;Clostridium_g7_f_uc_s	Clostridium_g7_f_uc_s	0	0	0	0	0	0	0	0.00539	0.00636	0	0	0.01175	0	0	0	0	0	0	0	1	1	0	0	2
	Bacteria;;;Firmicutes;;Bacilli;;Lactobacillales;;Leuconostocaceae;;Weissella;Weissella cibaria	Weissella cibaria	0	0	0	0	0	0	0	0	0	0	0.0123	0.0123	0	0	0	0	0	0	0	0	0	0	2	2
	Bacteria;;;Firmicutes;;Clostridia;;Clostridiales;;Lachnospiraceae;;Anaerobium;Anaerobium_uc	Anaerobium_uc	0	0	0	0	0	0	0	0.00539	0	0.00593	0	0.01132	0	0	0	0	0	0	0	1	0	1	0	2
	Bacteria;;;Firmicutes;;Clostridia;;Clostridiales;;Lachnospiraceae;;GQ898349_g;GQ898349_s	GQ898349_s	0.00646	0	0	0	0	0	0	0	0	0.00593	0	0.01239	1	0	0	0	0	0	0	0	0	1	0	2
	Bacteria;;;Firmicutes;;Clostridia;;Clostridiales;;Peptostreptococcaceae;;Intestinibacter;Intestinibacter_uc	Intestinibacter_uc	0.01292	0	0	0	0	0	0	0	0	0	0	0.01292	2	0	0	0	0	0	0	0	0	0	0	2
	Bacteria;;;Firmicutes;;Bacilli;;Bacillales;;Staphylococcaceae;;Staphylococcus;Staphylococcus aureus group	Staphylococcus aureus group	0	0	0	0	0.01301	0	0	0	0	0	0	0.01301	0	0	0	0	2	0	0	0	0	0	0	2
	Bacteria;;;Firmicutes;;Bacilli;;Gemella_o;;Gemella_f;;Gemella;Gemella_uc	Gemella_uc	0	0	0	0	0	0	0.00605	0	0.00636	0	0	0.01241	0	0	0	0	0	0	1	0	1	0	0	2
	Bacteria;;;Firmicutes;;Clostridia;;Clostridiales;;Lachnospiraceae;;DQ794184_g;DQ794184_s	DQ794184_s	0	0	0	0	0	0	0.00605	0	0	0.00593	0	0.01198	0	0	0	0	0	0	1	0	0	1	0	2
	Bacteria;;;Actinobacteria;;Actinobacteria_c;;Actinomycetales;;Actinomycetaceae;;Actinomyces;Actinomyces hordeovulneris	Actinomyces hordeovulneris	0	0	0	0.00671	0.00651	0	0	0	0	0	0	0.01322	0	0	0	1	1	0	0	0	0	0	0	2
	Bacteria;;;Firmicutes;;Clostridia;;Clostridiales;;Lachnospiraceae;;Hungatella;EU462089_s	EU462089_s	0	0	0	0	0.00651	0	0.00605	0	0	0	0	0.01256	0	0	0	0	1	0	1	0	0	0	0	2
	Bacteria;;;Proteobacteria;;Gammaproteobacteria;;Enterobacteriales;;Enterobacteriaceae;;Salmonella;Salmonella_uc	Salmonella_uc	0	0	0	0	0	0	0	0	0.00636	0	0.00615	0.01251	0	0	0	0	0	0	0	0	1	0	1	2
	Bacteria;;;Firmicutes;;Clostridia;;Clostridiales;;Lachnospiraceae;;Murimonas;Murimonas_uc	Murimonas_uc	0.00646	0	0	0	0.00651	0	0	0	0	0	0	0.01297	1	0	0	0	1	0	0	0	0	0	0	2
	Bacteria;;;Firmicutes;;Bacilli;;Lactobacillales;;Lactobacillaceae;;Lactobacillus;GQ156344_s	GQ156344_s	0	0	0	0	0	0	0.01209	0	0	0	0	0.01209	0	0	0	0	0	0	2	0	0	0	0	2
	Bacteria;;;Proteobacteria;;Epsilonproteobacteria;;Campylobacterales;;Campylobacteraceae;;Campylobacteraceae_uc;Campylobacteraceae_uc_s	Campylobacteraceae_uc_s	0	0	0	0.01343	0	0	0	0	0	0	0	0.01343	0	0	0	2	0	0	0	0	0	0	0	2
	Bacteria;;;Firmicutes;;Clostridia;;Clostridiales;;Lachnospiraceae;;Murimonas;Murimonas intestini	Murimonas intestini	0	0	0	0.00671	0	0	0	0	0	0.00593	0	0.01264	0	0	0	1	0	0	0	0	0	1	0	2
	Bacteria;;;Firmicutes;;Clostridia;;Clostridiales;;Thermohalobacter_f;;Thermohalobacter_f_uc;Thermohalobacter_f_uc_s	Thermohalobacter_f_uc_s	0.00646	0	0	0	0	0	0	0.00539	0	0	0	0.01185	1	0	0	0	0	0	0	1	0	0	0	2
	Bacteria;;;Firmicutes;;Erysipelotrichi;;Erysipelotrichi_uc;;Erysipelotrichi_uc_f;;Erysipelotrichi_uc_g;Erysipelotrichi_uc_s	Erysipelotrichi_uc_s	0	0	0.00765	0	0	0	0	0	0.00636	0	0	0.01401	0	0	1	0	0	0	0	0	1	0	0	2
	Bacteria;;;Firmicutes;;Clostridia;;Clostridiales;;Lachnospiraceae;;Marvinbryantia;FJ367892_s	FJ367892_s	0	0	0	0	0.01301	0	0	0	0	0	0	0.01301	0	0	0	0	2	0	0	0	0	0	0	2
	Bacteria;;;Firmicutes;;Clostridia;;Clostridiales;;Ruminococcaceae;;Ruminococcus;Ruminococcus_uc	Ruminococcus_uc	0	0	0	0	0.00651	0	0	0	0	0.00593	0	0.01244	0	0	0	0	1	0	0	0	0	1	0	2
	Bacteria;;;Firmicutes;;Clostridia;;Clostridiales;;Lachnospiraceae;;Hungatella;EF025278_s	EF025278_s	0	0	0	0	0	0	0	0.00539	0	0.00593	0	0.01132	0	0	0	0	0	0	0	1	0	1	0	2
	Bacteria;;;Firmicutes;;Clostridia;;Clostridiales;;Ruminococcaceae;;GQ175418_g;GQ175418_g_uc	GQ175418_g_uc	0	0.01367	0	0	0	0	0	0	0	0	0	0.01367	0	2	0	0	0	0	0	0	0	0	0	2
	Bacteria;;;Firmicutes;;Clostridia;;Clostridiales;;Clostridiaceae;;Anaerobacter;Anaerobacter_uc	Anaerobacter_uc	0	0.01367	0	0	0	0	0	0	0	0	0	0.01367	0	2	0	0	0	0	0	0	0	0	0	2
	Bacteria;;;Firmicutes;;Bacilli;;Lactobacillales;;Lactobacillaceae;;Lactobacillus;GQ156551_s	GQ156551_s	0	0	0	0	0	0	0.01209	0	0	0	0	0.01209	0	0	0	0	0	0	2	0	0	0	0	2
	Bacteria;;;Firmicutes;;Erysipelotrichi;;Erysipelotrichales;;Coprobacillus_f;;Clostridium_g6;Clostridium cocleatum	Clostridium cocleatum	0	0	0	0	0	0	0	0.00539	0	0	0.00615	0.01154	0	0	0	0	0	0	0	1	0	0	1	2
	Bacteria;;;Proteobacteria;;Gammaproteobacteria;;Enterobacteriales;;Enterobacteriaceae;;Pantoea;Pantoea theicola	Pantoea theicola	0	0	0	0	0	0	0	0	0	0	0.0123	0.0123	0	0	0	0	0	0	0	0	0	0	2	2
	Bacteria;;;Proteobacteria;;Betaproteobacteria;;Burkholderiales;;Sutterella_f;;Parasutterella;Parasutterella_uc	Parasutterella_uc	0	0	0	0	0	0.01417	0	0	0	0	0	0.01417	0	0	0	0	0	2	0	0	0	0	0	2
	Bacteria;;;Firmicutes;;Clostridia;;Clostridiales;;Lachnospiraceae;;DQ794184_g;DQ794184_g_uc	DQ794184_g_uc	0	0.00684	0.00765	0	0	0	0	0	0	0	0	0.01449	0	1	1	0	0	0	0	0	0	0	0	2
	Bacteria;;;Firmicutes;;Clostridia;;Clostridiales;;Clostridiaceae;;Clostridium;Eubacterium multiforme	Eubacterium multiforme	0.00646	0.00684	0	0	0	0	0	0	0	0	0	0.0133	1	1	0	0	0	0	0	0	0	0	0	2
	Bacteria;;;Firmicutes;;Clostridia;;Clostridiales;;Lachnospiraceae;;KE159797_g;KE159797_g_uc	KE159797_g_uc	0	0	0	0.00671	0	0	0.00605	0	0	0	0	0.01276	0	0	0	1	0	0	1	0	0	0	0	2
	Bacteria;;;Firmicutes;;Clostridia;;Clostridiales;;Lachnospiraceae;;EF099428_g;DQ793895_s	DQ793895_s	0	0	0	0	0.01301	0	0	0	0	0	0	0.01301	0	0	0	0	2	0	0	0	0	0	0	2
	Bacteria;;;Firmicutes;;Clostridia;;Clostridiales;;Peptostreptococcaceae;;Peptostreptococcus;Peptostreptococcus_uc	Peptostreptococcus_uc	0.00646	0	0	0	0.00651	0	0	0	0	0	0	0.01297	1	0	0	0	1	0	0	0	0	0	0	2
	Bacteria;;;Firmicutes;;Clostridia;;Clostridiales;;Ruminococcaceae;;Faecalibacterium;Faecalibacterium_uc	Faecalibacterium_uc	0	0	0.01529	0	0	0	0	0	0	0	0	0.01529	0	0	2	0	0	0	0	0	0	0	0	2
	Bacteria;;;Firmicutes;;Clostridia;;Clostridiales;;Lachnospiraceae;;DQ057459_g;FJ685504_s	FJ685504_s	0	0	0	0	0.00651	0	0	0	0	0.00593	0	0.01244	0	0	0	0	1	0	0	0	0	1	0	2
	Bacteria;;;Actinobacteria;;Actinobacteria_c;;Actinomycetales;;Actinomycetaceae;;Actinomyces;Actinomyces weissii	Actinomyces weissii	0	0	0	0	0	0	0.00605	0	0	0.00593	0	0.01198	0	0	0	0	0	0	1	0	0	1	0	2
	Bacteria;;;Bacteroidetes;;Bacteroidia;;Bacteroidales;;Bacteroidaceae;;Bacteroides;EU772744_s	EU772744_s	0	0	0	0	0	0.01417	0	0	0	0	0	0.01417	0	0	0	0	0	2	0	0	0	0	0	2
	Bacteria;;;Firmicutes;;Clostridia;;Clostridiales;;Lachnospiraceae;;Butyrivibrio_g1;JX095389_s	JX095389_s	0.00646	0	0	0	0	0	0.00605	0	0	0	0	0.01251	1	0	0	0	0	0	1	0	0	0	0	2
	Bacteria;;;Firmicutes;;Negativicutes;;Negativicutes_uc;;Negativicutes_uc_f;;Negativicutes_uc_g;Negativicutes_uc_s	Negativicutes_uc_s	0	0	0.00765	0	0	0	0	0	0.00636	0	0	0.01401	0	0	1	0	0	0	0	0	1	0	0	2
	Bacteria;;;Fusobacteria;;Fusobacteria_c;;Fusobacteriales;;Fusobacteriaceae;;Fusobacterium;Fusobacterium equinum	Fusobacterium equinum	0.00646	0	0.00765	0	0	0	0	0	0	0	0	0.01411	1	0	1	0	0	0	0	0	0	0	0	2
	Bacteria;;;Firmicutes;;Bacilli;;Lactobacillales;;Aerococcaceae;;Globicatella;DQ113697_s	DQ113697_s	0	0	0	0.00671	0.00651	0	0	0	0	0	0	0.01322	0	0	0	1	1	0	0	0	0	0	0	2
	Bacteria;;;Actinobacteria;;Actinobacteria_c;;Actinomycetales;;Actinomycetaceae;;Actinomycetaceae_uc;Actinomycetaceae_uc_s	Actinomycetaceae_uc_s	0	0	0	0	0	0	0.00605	0.00539	0	0	0	0.01144	0	0	0	0	0	0	1	1	0	0	0	2
	Bacteria;;;Bacteroidetes;;Bacteroidia;;Bacteroidales;;Rikenellaceae;;Alistipes;Alistipes shahii	Alistipes shahii	0	0	0.01529	0	0	0	0	0	0	0	0	0.01529	0	0	2	0	0	0	0	0	0	0	0	2
	Bacteria;;;Firmicutes;;Clostridia;;Clostridiales;;Lachnospiraceae;;Blautia;EU779302_s	EU779302_s	0	0	0	0	0.01301	0	0	0	0	0	0	0.01301	0	0	0	0	2	0	0	0	0	0	0	2
	Bacteria;;;Firmicutes;;Clostridia;;Clostridiales;;Mogibacterium_f;;Mogibacterium_f_uc;Mogibacterium_f_uc_s	Mogibacterium_f_uc_s	0	0.00684	0	0.00671	0	0	0	0	0	0	0	0.01355	0	1	0	1	0	0	0	0	0	0	0	2
	Bacteria;;;Firmicutes;;Bacilli;;Lactobacillales;;Enterococcaceae;;Enterococcus;Enterococcus dispar	Enterococcus dispar	0	0	0	0	0	0	0	0	0	0.01187	0	0.01187	0	0	0	0	0	0	0	0	0	2	0	2
	Bacteria;;;Actinobacteria;;Actinobacteria_c;;Corynebacteriales;;Corynebacteriaceae;;Corynebacterium;JF241012_s	JF241012_s	0	0	0	0	0	0	0	0.00539	0.00636	0	0	0.01175	0	0	0	0	0	0	0	1	1	0	0	2
	Bacteria;;;Firmicutes;;Clostridia;;Clostridiales;;Lachnospiraceae;;Hungatella;EU462151_s	EU462151_s	0.01292	0	0	0	0	0	0	0	0	0	0	0.01292	2	0	0	0	0	0	0	0	0	0	0	2
	Bacteria;;;Actinobacteria;;Coriobacteriia;;Coriobacteriales;;Coriobacteriaceae;;Olsenella;Olsenella_uc	Olsenella_uc	0	0	0	0	0	0	0	0	0.00636	0	0.00615	0.01251	0	0	0	0	0	0	0	0	1	0	1	2
	Bacteria;;;Proteobacteria;;Betaproteobacteria;;Burkholderiales;;Burkholderiales_uc;;Burkholderiales_uc_g;Burkholderiales_uc_s	Burkholderiales_uc_s	0	0	0.01529	0	0	0	0	0	0	0	0	0.01529	0	0	2	0	0	0	0	0	0	0	0	2
	Bacteria;;;Firmicutes;;Clostridia;;Clostridiales;;Lachnospiraceae;;EF099428_g;EF099428_g_uc	EF099428_g_uc	0	0	0	0.00671	0	0	0	0	0	0	0	0.00671	0	0	0	1	0	0	0	0	0	0	0	1
	Bacteria;;;Firmicutes;;Clostridia;;Clostridiales;;Peptostreptococcaceae;;Asaccharospora;Asaccharospora irregularis	Asaccharospora irregularis	0	0	0	0	0	0	0	0	0	0.00593	0	0.00593	0	0	0	0	0	0	0	0	0	1	0	1
	Bacteria;;;Firmicutes;;Bacilli;;Lactobacillales;;Streptococcaceae;;Streptococcus;Streptococcus sinensis	Streptococcus sinensis	0	0	0	0	0.00651	0	0	0	0	0	0	0.00651	0	0	0	0	1	0	0	0	0	0	0	1
	Bacteria;;;Firmicutes;;Clostridia;;Clostridiales;;Lachnospiraceae;;Blautia;GQ175463_s	GQ175463_s	0	0	0	0	0	0	0	0.00539	0	0	0	0.00539	0	0	0	0	0	0	0	1	0	0	0	1
	Bacteria;;;Firmicutes;;Bacilli;;Lactobacillales;;Enterococcaceae;;Enterococcus;Enterococcus hermanniensis	Enterococcus hermanniensis	0	0	0	0	0	0	0	0	0	0.00593	0	0.00593	0	0	0	0	0	0	0	0	0	1	0	1
	Bacteria;;;Firmicutes;;Clostridia;;Clostridiales;;Peptostreptococcaceae;;Romboutsia;GQ138429_s	GQ138429_s	0	0	0	0	0.00651	0	0	0	0	0	0	0.00651	0	0	0	0	1	0	0	0	0	0	0	1
	Bacteria;;;Firmicutes;;Clostridia;;Clostridiales;;Clostridiaceae;;Clostridium;GU559792_s	GU559792_s	0	0	0	0	0	0	0	0.00539	0	0	0	0.00539	0	0	0	0	0	0	0	1	0	0	0	1
	Bacteria;;;Firmicutes;;Clostridia;;Clostridiales;;Lachnospiraceae;;DQ057459_g;AB506269_s	AB506269_s	0	0	0	0.00671	0	0	0	0	0	0	0	0.00671	0	0	0	1	0	0	0	0	0	0	0	1
	Bacteria;;;Firmicutes;;Bacilli;;Lactobacillales;;Streptococcaceae;;Streptococcus;Streptococcus iniae	Streptococcus iniae	0	0	0	0	0	0	0	0	0.00636	0	0	0.00636	0	0	0	0	0	0	0	0	1	0	0	1
	Bacteria;;;Firmicutes;;Clostridia;;Clostridiales;;Lachnospiraceae;;Hungatella;HQ767430_s	HQ767430_s	0	0	0	0	0.00651	0	0	0	0	0	0	0.00651	0	0	0	0	1	0	0	0	0	0	0	1
	Bacteria;;;Firmicutes;;Bacilli;;Lactobacillales;;Lactobacillaceae;;Lactobacillus;Lactobacillus acidophilus	Lactobacillus acidophilus	0	0	0	0	0	0	0.00605	0	0	0	0	0.00605	0	0	0	0	0	0	1	0	0	0	0	1
	Bacteria;;;Firmicutes;;Clostridia;;Clostridiales;;Lachnospiraceae;;Hungatella;AY984751_s	AY984751_s	0	0	0	0	0	0	0	0	0.00636	0	0	0.00636	0	0	0	0	0	0	0	0	1	0	0	1
	Bacteria;;;Firmicutes;;Clostridia;;Clostridiales;;Lachnospiraceae;;Hungatella;AB234506_s	AB234506_s	0	0	0	0	0	0	0.00605	0	0	0	0	0.00605	0	0	0	0	0	0	1	0	0	0	0	1
	Bacteria;;;Firmicutes;;Erysipelotrichi;;Erysipelotrichales;;Allobaculum_f;;ASTB_g;FJ881277_s	FJ881277_s	0	0	0	0	0	0	0	0	0	0	0.00615	0.00615	0	0	0	0	0	0	0	0	0	0	1	1
	Bacteria;;;Firmicutes;;Negativicutes;;Selenomonadales;;Acidaminococcaceae;;Acidaminococcaceae_uc;Acidaminococcaceae_uc_s	Acidaminococcaceae_uc_s	0	0	0	0	0	0	0	0	0.00636	0	0	0.00636	0	0	0	0	0	0	0	0	1	0	0	1
	Bacteria;;;Firmicutes;;Clostridia;;Clostridiales;;Anaerovirgula_f;;Caminicella;FN356341_s	FN356341_s	0	0.00684	0	0	0	0	0	0	0	0	0	0.00684	0	1	0	0	0	0	0	0	0	0	0	1
	Bacteria;;;Firmicutes;;Clostridia;;Clostridiales;;Lachnospiraceae;;EF404752_g;DQ057374_s	DQ057374_s	0	0	0	0	0.00651	0	0	0	0	0	0	0.00651	0	0	0	0	1	0	0	0	0	0	0	1
	Bacteria;;;Firmicutes;;Clostridia;;Clostridiales;;Lachnospiraceae;;Coprococcus_g2;EU779209_s	EU779209_s	0.00646	0	0	0	0	0	0	0	0	0	0	0.00646	1	0	0	0	0	0	0	0	0	0	0	1
	Bacteria;;;Firmicutes;;Clostridia;;Clostridiales;;Mogibacterium_f;;Eubacterium_g11;JN713233_s	JN713233_s	0	0	0	0	0	0	0.00605	0	0	0	0	0.00605	0	0	0	0	0	0	1	0	0	0	0	1
	Bacteria;;;Firmicutes;;Clostridia;;Clostridiales;;Lachnospiraceae;;Hungatella;HQ769817_s	HQ769817_s	0	0	0	0	0	0	0	0	0	0	0.00615	0.00615	0	0	0	0	0	0	0	0	0	0	1	1
	Bacteria;;;Firmicutes;;Clostridia;;Clostridiales;;Lachnospiraceae;;Hungatella;EF402180_s	EF402180_s	0	0	0.00765	0	0	0	0	0	0	0	0	0.00765	0	0	1	0	0	0	0	0	0	0	0	1
	Bacteria;;;Firmicutes;;Clostridia;;Clostridiales;;Lachnospiraceae;;Clostridium_g12;HQ770262_s	HQ770262_s	0	0	0	0	0	0	0	0.00539	0	0	0	0.00539	0	0	0	0	0	0	0	1	0	0	0	1
	Bacteria;;;Actinobacteria;;Actinobacteria_c;;Bifidobacteriales;;Bifidobacteriales_uc;;Bifidobacteriales_uc_g;Bifidobacteriales_uc_s	Bifidobacteriales_uc_s	0	0	0	0	0	0	0.00605	0	0	0	0	0.00605	0	0	0	0	0	0	1	0	0	0	0	1
	Bacteria;;;Firmicutes;;Clostridia;;Clostridiales;;Lachnospiraceae;;Blautia;DQ804478_s	DQ804478_s	0	0	0	0	0	0.00709	0	0	0	0	0	0.00709	0	0	0	0	0	1	0	0	0	0	0	1
	Bacteria;;;Firmicutes;;Clostridia;;Clostridiales;;Lachnospiraceae;;GQ451310_g;GQ451310_s	GQ451310_s	0	0	0	0	0	0	0	0	0	0.00593	0	0.00593	0	0	0	0	0	0	0	0	0	1	0	1
	Bacteria;;;Firmicutes;;Clostridia;;Clostridiales;;Lachnospiraceae;;Hungatella;DQ342332_s	DQ342332_s	0	0	0	0	0	0.00709	0	0	0	0	0	0.00709	0	0	0	0	0	1	0	0	0	0	0	1
	Bacteria;;;Firmicutes;;Clostridia;;Clostridiales;;Lachnospiraceae;;EU794202_g;EU461075_s	EU461075_s	0	0	0	0	0	0	0	0.00539	0	0	0	0.00539	0	0	0	0	0	0	0	1	0	0	0	1
	Bacteria;;;Firmicutes;;Erysipelotrichi;;Turicibacter_o;;Turicibacter_f;;Turicibacter;AJ400262_s	AJ400262_s	0	0	0	0	0	0.00709	0	0	0	0	0	0.00709	0	0	0	0	0	1	0	0	0	0	0	1
	Bacteria;;;Proteobacteria;;Gammaproteobacteria;;Enterobacteriales;;Enterobacteriaceae;;Pantoea;JTJJ_s	JTJJ_s	0	0	0	0	0	0	0	0	0	0	0.00615	0.00615	0	0	0	0	0	0	0	0	0	0	1	1
	Bacteria;;;Firmicutes;;Bacilli;;Lactobacillales;;Lactobacillaceae;;Lactobacillus;Lactobacillus fabifermentans	Lactobacillus fabifermentans	0	0	0	0	0	0	0.00605	0	0	0	0	0.00605	0	0	0	0	0	0	1	0	0	0	0	1
	Bacteria;;;Proteobacteria;;Deltaproteobacteria;;Desulfovibrionales;;Desulfovibrionaceae;;Bilophila;Bilophila_uc	Bilophila_uc	0	0	0	0	0	0	0.00605	0	0	0	0	0.00605	0	0	0	0	0	0	1	0	0	0	0	1
	Bacteria;;;Bacteroidetes;;Bacteroidia;;Bacteroidales;;Bacteroidaceae;;Bacteroides;Bacteroides eggerthii	Bacteroides eggerthii	0	0	0	0	0	0.00709	0	0	0	0	0	0.00709	0	0	0	0	0	1	0	0	0	0	0	1
	Bacteria;;;Firmicutes;;Bacilli;;Lactobacillales;;Leuconostocaceae;;Leuconostoc;Leuconostoc mesenteroides group	Leuconostoc mesenteroides group	0.00646	0	0	0	0	0	0	0	0	0	0	0.00646	1	0	0	0	0	0	0	0	0	0	0	1
	Bacteria;;;Firmicutes;;Clostridia;;Clostridiales;;Mogibacterium_f;;Eubacterium_g10;Eubacterium infirmum	Eubacterium infirmum	0	0	0	0	0	0	0.00605	0	0	0	0	0.00605	0	0	0	0	0	0	1	0	0	0	0	1
	Bacteria;;;Firmicutes;;Negativicutes;;Selenomonadales;;Veillonellaceae;;Megasphaera;Megasphaera indica	Megasphaera indica	0	0.00684	0	0	0	0	0	0	0	0	0	0.00684	0	1	0	0	0	0	0	0	0	0	0	1
	Bacteria;;;Firmicutes;;Clostridia;;Clostridiales;;Clostridiaceae;;Clostridium;Clostridium gasigenes	Clostridium gasigenes	0	0	0	0	0	0	0.00605	0	0	0	0	0.00605	0	0	0	0	0	0	1	0	0	0	0	1
	Bacteria;;;Actinobacteria;;Coriobacteriia;;Coriobacteriales;;Coriobacteriaceae;;Collinsella;FJ978553_s	FJ978553_s	0	0	0	0	0.00651	0	0	0	0	0	0	0.00651	0	0	0	0	1	0	0	0	0	0	0	1
	Bacteria;;;Bacteroidetes;;Bacteroidia;;Bacteroidales;;Bacteroidaceae;;Bacteroides;HQ794799_s	HQ794799_s	0	0	0	0	0	0.00709	0	0	0	0	0	0.00709	0	0	0	0	0	1	0	0	0	0	0	1
	Bacteria;;;Actinobacteria;;Actinobacteria_c;;Actinomycetales;;Actinomycetaceae;;Actinomyces;Actinomyces bowdenii	Actinomyces bowdenii	0	0	0	0	0	0	0.00605	0	0	0	0	0.00605	0	0	0	0	0	0	1	0	0	0	0	1
	Bacteria;;;Actinobacteria;;Coriobacteriia;;Coriobacteriales;;Coriobacteriaceae;;Slackia;EU776181_s	EU776181_s	0	0	0	0	0.00651	0	0	0	0	0	0	0.00651	0	0	0	0	1	0	0	0	0	0	0	1
	Bacteria;;;Proteobacteria;;Gammaproteobacteria;;Chromatiales;;Chromatiales_uc;;Chromatiales_uc_g;Chromatiales_uc_s	Chromatiales_uc_s	0	0	0	0	0	0	0	0.00539	0	0	0	0.00539	0	0	0	0	0	0	0	1	0	0	0	1
	Bacteria;;;Firmicutes;;Clostridia;;Clostridiales;;Lachnospiraceae;;AB606330_g;AB606330_g_uc	AB606330_g_uc	0.00646	0	0	0	0	0	0	0	0	0	0	0.00646	1	0	0	0	0	0	0	0	0	0	0	1
	Bacteria;;;Firmicutes;;Clostridia;;Clostridiales;;Clostridiaceae;;Clostridium;JX223060_s	JX223060_s	0	0	0	0	0	0	0	0.00539	0	0	0	0.00539	0	0	0	0	0	0	0	1	0	0	0	1
	Bacteria;;;Proteobacteria;;Betaproteobacteria;;Burkholderiales;;Sutterella_f;;AJ315485_g;HQ780761_s	HQ780761_s	0	0	0.00765	0	0	0	0	0	0	0	0	0.00765	0	0	1	0	0	0	0	0	0	0	0	1
	Bacteria;;;Firmicutes;;Clostridia;;Clostridiales;;Lachnospiraceae;;Dorea;GQ871721_s	GQ871721_s	0	0	0	0	0.00651	0	0	0	0	0	0	0.00651	0	0	0	0	1	0	0	0	0	0	0	1
	Bacteria;;;Firmicutes;;Clostridia;;Clostridiales;;Lachnospiraceae;;Hungatella;FJ680323_s	FJ680323_s	0	0	0	0	0.00651	0	0	0	0	0	0	0.00651	0	0	0	0	1	0	0	0	0	0	0	1
	Bacteria;;;Proteobacteria;;Gammaproteobacteria;;Enterobacteriales;;Enterobacteriaceae;;Enterobacter;Enterobacter_uc	Enterobacter_uc	0	0	0	0	0	0	0	0	0.00636	0	0	0.00636	0	0	0	0	0	0	0	0	1	0	0	1
	Bacteria;;;Firmicutes;;Bacilli;;Lactobacillales;;Streptococcaceae;;Streptococcus;JWEZ_s	JWEZ_s	0	0	0	0	0	0	0.00605	0	0	0	0	0.00605	0	0	0	0	0	0	1	0	0	0	0	1
	Bacteria;;;Firmicutes;;Clostridia;;Clostridiales;;Lachnospiraceae;;Blautia;AF349417_s	AF349417_s	0	0	0	0	0	0.00709	0	0	0	0	0	0.00709	0	0	0	0	0	1	0	0	0	0	0	1
	Bacteria;;;Proteobacteria;;Gammaproteobacteria;;Enterobacteriales;;Enterobacteriaceae;;Proteus;Proteus mirabilis	Proteus mirabilis	0	0.00684	0	0	0	0	0	0	0	0	0	0.00684	0	1	0	0	0	0	0	0	0	0	0	1
	Bacteria;;;Firmicutes;;Clostridia;;Clostridiales;;Lachnospiraceae;;Dorea;EF071375_s	EF071375_s	0	0	0	0.00671	0	0	0	0	0	0	0	0.00671	0	0	0	1	0	0	0	0	0	0	0	1
	Bacteria;;;Firmicutes;;Clostridia;;Clostridiales;;Epulopiscium_f;;Epulopiscium_f_uc;Epulopiscium_f_uc_s	Epulopiscium_f_uc_s	0.00646	0	0	0	0	0	0	0	0	0	0	0.00646	1	0	0	0	0	0	0	0	0	0	0	1
	Bacteria;;;Firmicutes;;Clostridia;;Clostridiales;;Lachnospiraceae;;Dorea;Dorea longicatena	Dorea longicatena	0	0	0	0	0	0	0	0	0	0.00593	0	0.00593	0	0	0	0	0	0	0	0	0	1	0	1
	Bacteria;;;Firmicutes;;Bacilli;;Lactobacillales;;Enterococcaceae;;Vagococcus;Vagococcus fluvialis	Vagococcus fluvialis	0	0	0	0	0.00651	0	0	0	0	0	0	0.00651	0	0	0	0	1	0	0	0	0	0	0	1
	Bacteria;;;Firmicutes;;Clostridia;;Clostridiales;;Lachnospiraceae;;EF403870_g;EU474900_s	EU474900_s	0	0	0	0	0.00651	0	0	0	0	0	0	0.00651	0	0	0	0	1	0	0	0	0	0	0	1
	Bacteria;;;Firmicutes;;Bacilli;;Lactobacillales;;Aerococcaceae;;Abiotrophia;Abiotrophia_uc	Abiotrophia_uc	0	0	0	0	0	0	0	0	0.00636	0	0	0.00636	0	0	0	0	0	0	0	0	1	0	0	1
	Bacteria;;;Firmicutes;;Bacilli;;Lactobacillales;;Aerococcaceae;;Granulicatella;JVNU_s	JVNU_s	0	0	0	0	0	0	0	0	0.00636	0	0	0.00636	0	0	0	0	0	0	0	0	1	0	0	1
	Bacteria;;;Firmicutes;;Clostridia;;Clostridiales;;Lachnospiraceae;;Clostridium_g23;AM405126_s	AM405126_s	0	0	0	0	0	0	0	0	0.00636	0	0	0.00636	0	0	0	0	0	0	0	0	1	0	0	1
	Bacteria;;;Firmicutes;;Clostridia;;Clostridiales;;Lachnospiraceae;;Hungatella;Clostridium amygdalinum	Clostridium amygdalinum	0.00646	0	0	0	0	0	0	0	0	0	0	0.00646	1	0	0	0	0	0	0	0	0	0	0	1
	Bacteria;;;Firmicutes;;Clostridia;;Clostridiales;;Clostridium_g8_f;;Clostridium_g8;Clostridium colinum	Clostridium colinum	0	0	0	0	0	0.00709	0	0	0	0	0	0.00709	0	0	0	0	0	1	0	0	0	0	0	1
	Bacteria;;;Firmicutes;;Negativicutes;;Selenomonadales;;Acidaminococcaceae;;Phascolarctobacterium;AM500725_s	AM500725_s	0	0	0.00765	0	0	0	0	0	0	0	0	0.00765	0	0	1	0	0	0	0	0	0	0	0	1
	Bacteria;;;Firmicutes;;Clostridia;;Clostridiales;;Ruminococcaceae;;Subdoligranulum;Subdoligranulum_uc	Subdoligranulum_uc	0	0	0	0	0	0	0	0	0	0.00593	0	0.00593	0	0	0	0	0	0	0	0	0	1	0	1
	Bacteria;;;Firmicutes;;Bacilli;;Bacillales;;Staphylococcaceae;;Staphylococcus;Staphylococcus gallinarum	Staphylococcus gallinarum	0	0	0	0	0	0	0	0.00539	0	0	0	0.00539	0	0	0	0	0	0	0	1	0	0	0	1
	Bacteria;;;Firmicutes;;Clostridia;;Clostridiales;;Lachnospiraceae;;Hungatella;GQ491627_s	GQ491627_s	0	0	0	0	0.00651	0	0	0	0	0	0	0.00651	0	0	0	0	1	0	0	0	0	0	0	1
	Bacteria;;;Bacteroidetes;;Bacteroidia;;Bacteroidales;;Prevotellaceae;;Prevotella;EU461603_s	EU461603_s	0	0	0.00765	0	0	0	0	0	0	0	0	0.00765	0	0	1	0	0	0	0	0	0	0	0	1
	Bacteria;;;Firmicutes;;Clostridia;;Clostridiales;;Lachnospiraceae;;KE159538_g;KE159538_g_uc	KE159538_g_uc	0	0	0.00765	0	0	0	0	0	0	0	0	0.00765	0	0	1	0	0	0	0	0	0	0	0	1
	Bacteria;;;Bacteroidetes;;Bacteroidia;;Bacteroidales;;Bacteroidaceae;;Bacteroides;HQ779120_s	HQ779120_s	0	0	0	0	0	0	0	0	0	0	0.00615	0.00615	0	0	0	0	0	0	0	0	0	0	1	1
	Bacteria;;;Firmicutes;;Clostridia;;Clostridiales;;Lachnospiraceae;;Ruminococcus_g4;HQ820207_s	HQ820207_s	0	0	0	0	0	0	0	0.00539	0	0	0	0.00539	0	0	0	0	0	0	0	1	0	0	0	1
	Bacteria;;;Firmicutes;;Clostridia;;Clostridiales;;Lachnospiraceae;;Hungatella;EF604693_s	EF604693_s	0	0	0	0	0.00651	0	0	0	0	0	0	0.00651	0	0	0	0	1	0	0	0	0	0	0	1
	Bacteria;;;Firmicutes;;Clostridia;;Clostridiales;;Epulopiscium_f;;Epulopiscium;Epulopiscium_uc	Epulopiscium_uc	0.00646	0	0	0	0	0	0	0	0	0	0	0.00646	1	0	0	0	0	0	0	0	0	0	0	1
	Bacteria;;;Bacteroidetes;;Bacteroidia;;Bacteroidales;;Odoribacter_f;;Odoribacter_f_uc;Odoribacter_f_uc_s	Odoribacter_f_uc_s	0	0	0.00765	0	0	0	0	0	0	0	0	0.00765	0	0	1	0	0	0	0	0	0	0	0	1
	Bacteria;;;Firmicutes;;Clostridia;;Clostridiales;;Clostridiaceae;;Clostridium;JX223038_s	JX223038_s	0	0	0	0	0	0	0	0	0	0.00593	0	0.00593	0	0	0	0	0	0	0	0	0	1	0	1
	Bacteria;;;Firmicutes;;Bacilli;;Lactobacillales;;Streptococcaceae;;Streptococcus;Streptococcus troglodytidis	Streptococcus troglodytidis	0	0	0	0	0	0	0	0	0.00636	0	0	0.00636	0	0	0	0	0	0	0	0	1	0	0	1
	Bacteria;;;Firmicutes;;Clostridia;;Clostridiales;;Lachnospiraceae;;Coprococcus_g2;HQ742846_s	HQ742846_s	0	0	0	0	0.00651	0	0	0	0	0	0	0.00651	0	0	0	0	1	0	0	0	0	0	0	1
	Bacteria;;;Firmicutes;;Clostridia;;Clostridiales;;Lachnospiraceae;;Blautia;DQ057463_s	DQ057463_s	0	0	0	0	0	0	0	0	0	0.00593	0	0.00593	0	0	0	0	0	0	0	0	0	1	0	1
	Bacteria;;;Firmicutes;;Clostridia;;Clostridiales;;Lachnospiraceae;;EF404752_g;EU466069_s	EU466069_s	0	0	0	0	0.00651	0	0	0	0	0	0	0.00651	0	0	0	0	1	0	0	0	0	0	0	1
	Bacteria;;;Firmicutes;;Clostridia;;Clostridiales;;Clostridiaceae;;Clostridium;AB511858_s	AB511858_s	0	0.00684	0	0	0	0	0	0	0	0	0	0.00684	0	1	0	0	0	0	0	0	0	0	0	1
	Bacteria;;;Actinobacteria;;Actinobacteria_c;;Micrococcales;;Microbacteriaceae;;Canibacter;Canibacter_uc	Canibacter_uc	0	0	0	0	0	0	0	0	0	0	0.00615	0.00615	0	0	0	0	0	0	0	0	0	0	1	1
	Bacteria;;;Firmicutes;;Clostridia;;Clostridiales;;Lachnospiraceae;;Hungatella;DQ801664_s	DQ801664_s	0	0	0	0	0	0	0	0	0.00636	0	0	0.00636	0	0	0	0	0	0	0	0	1	0	0	1
	Bacteria;;;Firmicutes;;Clostridia;;Clostridiales;;Lachnospiraceae;;EU845632_g;FJ534957_s	FJ534957_s	0.00646	0	0	0	0	0	0	0	0	0	0	0.00646	1	0	0	0	0	0	0	0	0	0	0	1
	Bacteria;;;Firmicutes;;Negativicutes;;Selenomonadales;;Veillonellaceae;;Megamonas;EU939429_s	EU939429_s	0	0	0	0	0	0	0	0	0.00636	0	0	0.00636	0	0	0	0	0	0	0	0	1	0	0	1
	Bacteria;;;Bacteroidetes;;Bacteroidia;;Bacteroidales;;EF602759_f;;HM123925_g;HM123925_g_uc	HM123925_g_uc	0	0.00684	0	0	0	0	0	0	0	0	0	0.00684	0	1	0	0	0	0	0	0	0	0	0	1
	Bacteria;;;Firmicutes;;Clostridia;;Clostridiales;;Lachnospiraceae;;Blautia;FJ685248_s	FJ685248_s	0	0	0.00765	0	0	0	0	0	0	0	0	0.00765	0	0	1	0	0	0	0	0	0	0	0	1
	Bacteria;;;Cyanobacteria;;JF737898_c;;JF417809_o;;JF417809_f;;AJ583204_g;AJ583204_s	AJ583204_s	0	0	0	0	0.00651	0	0	0	0	0	0	0.00651	0	0	0	0	1	0	0	0	0	0	0	1
	Bacteria;;;Firmicutes;;Bacilli;;Lactobacillales;;Lactobacillaceae;;Lactobacillus;Lactobacillus salivarius	Lactobacillus salivarius	0	0	0	0	0.00651	0	0	0	0	0	0	0.00651	0	0	0	0	1	0	0	0	0	0	0	1
	Bacteria;;;Bacteroidetes;;Bacteroidia;;Bacteroidales;;Bacteroidaceae;;Bacteroides;HQ788867_s	HQ788867_s	0	0	0	0	0	0	0	0	0	0	0.00615	0.00615	0	0	0	0	0	0	0	0	0	0	1	1
	Bacteria;;;Firmicutes;;Bacilli;;Bacillales;;Staphylococcaceae;;Staphylococcus;Staphylococcus capitis group	Staphylococcus capitis group	0	0	0	0	0	0	0	0	0	0	0.00615	0.00615	0	0	0	0	0	0	0	0	0	0	1	1
	Bacteria;;;Actinobacteria;;Actinobacteria_c;;Bifidobacteriales;;Bifidobacteriaceae;;Bifidobacterium;Bifidobacterium dentium	Bifidobacterium dentium	0	0	0	0	0	0	0.00605	0	0	0	0	0.00605	0	0	0	0	0	0	1	0	0	0	0	1
	Bacteria;;;Firmicutes;;Erysipelotrichi;;Erysipelotrichales;;Coprobacillus_f;;Clostridium_g6;DQ057480_s	DQ057480_s	0	0	0	0	0	0	0	0	0	0.00593	0	0.00593	0	0	0	0	0	0	0	0	0	1	0	1
	Bacteria;;;Proteobacteria;;Gammaproteobacteria;;Aeromonadales;;Aeromonadales_uc;;Aeromonadales_uc_g;Aeromonadales_uc_s	Aeromonadales_uc_s	0	0	0.00765	0	0	0	0	0	0	0	0	0.00765	0	0	1	0	0	0	0	0	0	0	0	1
	Bacteria;;;Firmicutes;;Clostridia;;Clostridiales;;Lachnospiraceae;;Blautia;EU777561_s	EU777561_s	0	0	0	0	0.00651	0	0	0	0	0	0	0.00651	0	0	0	0	1	0	0	0	0	0	0	1
	Bacteria;;;Firmicutes;;Bacilli;;Lactobacillales;;Enterococcaceae;;Enterococcus;Enterococcus lactis	Enterococcus lactis	0	0.00684	0	0	0	0	0	0	0	0	0	0.00684	0	1	0	0	0	0	0	0	0	0	0	1
	Bacteria;;;Actinobacteria;;Coriobacteriia;;Coriobacteriales;;Coriobacteriaceae;;Eggerthella;Eggerthella_uc	Eggerthella_uc	0	0	0	0	0	0.00709	0	0	0	0	0	0.00709	0	0	0	0	0	1	0	0	0	0	0	1
	Bacteria;;;Firmicutes;;Clostridia;;Clostridiales;;Lachnospiraceae;;Anaerobium;FJ665211_s	FJ665211_s	0	0	0	0	0.00651	0	0	0	0	0	0	0.00651	0	0	0	0	1	0	0	0	0	0	0	1
	Bacteria;;;Fusobacteria;;Fusobacteria_c;;Fusobacteriales;;Fusobacteriaceae;;Cetobacterium;Cetobacterium somerae	Cetobacterium somerae	0	0	0	0.00671	0	0	0	0	0	0	0	0.00671	0	0	0	1	0	0	0	0	0	0	0	1
	Bacteria;;;Proteobacteria;;Gammaproteobacteria;;Enterobacteriales;;Enterobacteriaceae;;Hafnia;Hafnia alvei group	Hafnia alvei group	0	0	0	0	0	0.00709	0	0	0	0	0	0.00709	0	0	0	0	0	1	0	0	0	0	0	1
	Bacteria;;;Firmicutes;;Clostridia;;Clostridiales;;Lachnospiraceae;;Hungatella;FJ370610_s	FJ370610_s	0	0.00684	0	0	0	0	0	0	0	0	0	0.00684	0	1	0	0	0	0	0	0	0	0	0	1
	Bacteria;;;Firmicutes;;Clostridia;;Clostridiales;;Lachnospiraceae;;Clostridium_g21;EU505058_s	EU505058_s	0	0	0	0	0	0	0	0	0	0	0.00615	0.00615	0	0	0	0	0	0	0	0	0	0	1	1
	Bacteria;;;Actinobacteria;;Actinobacteria_c;;Bifidobacteriales;;Bifidobacteriaceae;;Bifidobacterium;Bifidobacterium aesculapii	Bifidobacterium aesculapii	0	0	0	0	0	0.00709	0	0	0	0	0	0.00709	0	0	0	0	0	1	0	0	0	0	0	1
	Bacteria;;;EU491194_p;;EU491194_c;;EU491194_o;;EU491194_f;;EU491194_g;EU491194_s	EU491194_s	0	0	0.00765	0	0	0	0	0	0	0	0	0.00765	0	0	1	0	0	0	0	0	0	0	0	1
	Bacteria;;;Firmicutes;;Bacilli;;Lactobacillales;;Streptococcaceae;;Streptococcus;Streptococcus sanguinis	Streptococcus sanguinis	0	0	0	0	0	0	0	0.00539	0	0	0	0.00539	0	0	0	0	0	0	0	1	0	0	0	1
	Bacteria;;;Firmicutes;;Negativicutes;;Selenomonadales;;Veillonellaceae;;Megamonas;EU778993_s	EU778993_s	0	0	0.00765	0	0	0	0	0	0	0	0	0.00765	0	0	1	0	0	0	0	0	0	0	0	1
	Bacteria;;;Firmicutes;;Bacilli;;Bacillales;;Planococcaceae;;Planococcaceae_uc;Planococcaceae_uc_s	Planococcaceae_uc_s	0	0	0	0	0	0	0	0	0	0.00593	0	0.00593	0	0	0	0	0	0	0	0	0	1	0	1
	Bacteria;;;Proteobacteria;;Alphaproteobacteria;;Sphingomonadales;;Sphingomonadaceae;;Sphingomonas;Sphingomonas canadensis	Sphingomonas canadensis	0	0	0	0	0	0	0	0	0	0	0.00615	0.00615	0	0	0	0	0	0	0	0	0	0	1	1
	Bacteria;;;Actinobacteria;;Actinobacteria_c;;Corynebacteriales;;Corynebacteriales_uc;;Corynebacteriales_uc_g;Corynebacteriales_uc_s	Corynebacteriales_uc_s	0	0	0	0	0	0	0	0.00539	0	0	0	0.00539	0	0	0	0	0	0	0	1	0	0	0	1
	Bacteria;;;Firmicutes;;Clostridia;;Clostridiales;;Lachnospiraceae;;Hungatella;AB506430_s	AB506430_s	0	0.00684	0	0	0	0	0	0	0	0	0	0.00684	0	1	0	0	0	0	0	0	0	0	0	1
	Bacteria;;;Firmicutes;;Bacilli;;Lactobacillales;;Enterococcaceae;;Enterococcus;FJ675223_s	FJ675223_s	0	0	0	0	0	0	0	0	0	0	0.00615	0.00615	0	0	0	0	0	0	0	0	0	0	1	1
	Bacteria;;;Firmicutes;;Clostridia;;Clostridiales;;Eubacteriaceae;;Eubacteriaceae_uc;Eubacteriaceae_uc_s	Eubacteriaceae_uc_s	0	0.00684	0	0	0	0	0	0	0	0	0	0.00684	0	1	0	0	0	0	0	0	0	0	0	1
	Bacteria;;;Actinobacteria;;Actinobacteria_c;;Actinobacteria_c_uc;;Actinobacteria_c_uc_f;;Actinobacteria_c_uc_g;Actinobacteria_c_uc_s	Actinobacteria_c_uc_s	0	0	0	0	0	0.00709	0	0	0	0	0	0.00709	0	0	0	0	0	1	0	0	0	0	0	1
	Bacteria;;;Firmicutes;;Erysipelotrichi;;Erysipelotrichales;;Coprobacillus_f;;Kandleria;JN245827_s	JN245827_s	0	0	0	0	0	0	0	0	0	0	0.00615	0.00615	0	0	0	0	0	0	0	0	0	0	1	1
	Bacteria;;;Bacteroidetes;;Bacteroidia;;Bacteroidales;;Bacteroidaceae;;Bacteroides;HQ757103_s	HQ757103_s	0	0	0	0	0	0	0	0	0	0	0.00615	0.00615	0	0	0	0	0	0	0	0	0	0	1	1
	Bacteria;;;Firmicutes;;Clostridia;;Clostridiales;;Clostridiaceae;;Clostridium;LAGG_s	LAGG_s	0.00646	0	0	0	0	0	0	0	0	0	0	0.00646	1	0	0	0	0	0	0	0	0	0	0	1
	Bacteria;;;Firmicutes;;Clostridia;;Clostridiales;;Lachnospiraceae;;Marvinbryantia;Marvinbryantia_uc	Marvinbryantia_uc	0	0	0	0.00671	0	0	0	0	0	0	0	0.00671	0	0	0	1	0	0	0	0	0	0	0	1
	Bacteria;;;Firmicutes;;Clostridia;;Clostridiales;;Lachnospiraceae;;EU843498_g;EU843498_s	EU843498_s	0	0	0	0	0	0	0	0.00539	0	0	0	0.00539	0	0	0	0	0	0	0	1	0	0	0	1
	Bacteria;;;Firmicutes;;Clostridia;;Clostridiales;;Clostridiaceae;;Clostridium;EF436397_s	EF436397_s	0	0	0.00765	0	0	0	0	0	0	0	0	0.00765	0	0	1	0	0	0	0	0	0	0	0	1
	Bacteria;;;Firmicutes;;Clostridia;;Clostridiales;;Lachnospiraceae;;Eubacterium_g4;Eubacterium_g4_uc	Eubacterium_g4_uc	0	0	0	0	0	0	0	0	0	0.00593	0	0.00593	0	0	0	0	0	0	0	0	0	1	0	1
	Bacteria;;;Firmicutes;;Clostridia;;Clostridiales;;Lachnospiraceae;;Coprococcus_g2;EU461414_s	EU461414_s	0	0	0.00765	0	0	0	0	0	0	0	0	0.00765	0	0	1	0	0	0	0	0	0	0	0	1
	Bacteria;;;Firmicutes;;Clostridia;;Clostridiales;;Lachnospiraceae;;EU844487_g;AB494818_s	AB494818_s	0	0.00684	0	0	0	0	0	0	0	0	0	0.00684	0	1	0	0	0	0	0	0	0	0	0	1
	Bacteria;;;Firmicutes;;Clostridia;;Clostridiales;;Clostridiaceae;;Clostridium;LAQZ_s	LAQZ_s	0	0.00684	0	0	0	0	0	0	0	0	0	0.00684	0	1	0	0	0	0	0	0	0	0	0	1
	Bacteria;;;Firmicutes;;Clostridia;;Clostridiales;;Lachnospiraceae;;Blautia;EU462857_s	EU462857_s	0	0	0	0	0.00651	0	0	0	0	0	0	0.00651	0	0	0	0	1	0	0	0	0	0	0	1
	Bacteria;;;Firmicutes;;Clostridia;;Clostridiales;;Anaerovirgula_f;;Anaerovirgula_f_uc;Anaerovirgula_f_uc_s	Anaerovirgula_f_uc_s	0	0	0	0.00671	0	0	0	0	0	0	0	0.00671	0	0	0	1	0	0	0	0	0	0	0	1
	Bacteria;;;Firmicutes;;Clostridia;;Clostridiales;;Lachnospiraceae;;EU775954_g;EU775954_g_uc	EU775954_g_uc	0	0	0	0	0.00651	0	0	0	0	0	0	0.00651	0	0	0	0	1	0	0	0	0	0	0	1
	Bacteria;;;Firmicutes;;Bacilli;;Lactobacillales;;Lactobacillaceae;;Lactobacillus;Lactobacillus graminis	Lactobacillus graminis	0	0	0.00765	0	0	0	0	0	0	0	0	0.00765	0	0	1	0	0	0	0	0	0	0	0	1
	Bacteria;;;Verrucomicrobia;;Verrucomicrobiae;;Verrucomicrobiales;;Akkermansia_f;;Akkermansia;Akkermansia_uc	Akkermansia_uc	0	0	0	0	0	0	0.00605	0	0	0	0	0.00605	0	0	0	0	0	0	1	0	0	0	0	1
	Bacteria;;;Bacteroidetes;;Bacteroidia;;Bacteroidales;;Bacteroidaceae;;Bacteroides;Bacteroides faecichinchillae	Bacteroides faecichinchillae	0	0	0	0	0	0	0	0	0	0	0.00615	0.00615	0	0	0	0	0	0	0	0	0	0	1	1
	Bacteria;;;Verrucomicrobia;;Verrucomicrobiae;;Verrucomicrobiales;;Akkermansia_f;;Akkermansia;Akkermansia muciniphila	Akkermansia muciniphila	0	0	0	0	0	0	0	0	0.00636	0	0	0.00636	0	0	0	0	0	0	0	0	1	0	0	1
	Bacteria;;;Proteobacteria;;Gammaproteobacteria;;Enterobacteriales;;Enterobacteriaceae;;Kluyvera;Kluyvera_uc	Kluyvera_uc	0	0	0	0	0	0	0	0	0.00636	0	0	0.00636	0	0	0	0	0	0	0	0	1	0	0	1
	Bacteria;;;Firmicutes;;Clostridia;;Clostridiales;;Lachnospiraceae;;Blautia;Blautia producta	Blautia producta	0	0	0.00765	0	0	0	0	0	0	0	0	0.00765	0	0	1	0	0	0	0	0	0	0	0	1
	Bacteria;;;Actinobacteria;;Coriobacteriia;;Coriobacteriales;;Coriobacteriaceae;;Atopobium;Atopobium parvulum	Atopobium parvulum	0	0	0	0	0	0	0.00605	0	0	0	0	0.00605	0	0	0	0	0	0	1	0	0	0	0	1
	Bacteria;;;Firmicutes;;Clostridia;;Clostridiales;;Lachnospiraceae;;EU475527_g;EU475527_g_uc	EU475527_g_uc	0	0	0	0	0	0	0	0	0	0.00593	0	0.00593	0	0	0	0	0	0	0	0	0	1	0	1
	Bacteria;;;Proteobacteria;;Betaproteobacteria;;Neisseriales;;Neisseriaceae;;AF366267_g;AF366267_s	AF366267_s	0	0	0	0	0	0	0.00605	0	0	0	0	0.00605	0	0	0	0	0	0	1	0	0	0	0	1
	Bacteria;;;Firmicutes;;Clostridia;;Clostridiales;;Lachnospiraceae;;Roseburia;Roseburia_uc	Roseburia_uc	0	0	0	0	0	0	0	0	0	0.00593	0	0.00593	0	0	0	0	0	0	0	0	0	1	0	1
	Bacteria;;;Proteobacteria;;Gammaproteobacteria;;Enterobacteriales;;Enterobacteriaceae;;Enterobacter;Enterobacter cloacae group	Enterobacter cloacae group	0	0	0	0	0	0	0	0	0	0	0.00615	0.00615	0	0	0	0	0	0	0	0	0	0	1	1
	Bacteria;;;Firmicutes;;Clostridia;;Clostridiales;;Lachnospiraceae;;GQ491129_g;GQ491129_g_uc	GQ491129_g_uc	0.00646	0	0	0	0	0	0	0	0	0	0	0.00646	1	0	0	0	0	0	0	0	0	0	0	1
	Bacteria;;;Firmicutes;;Clostridia;;Clostridiales;;Lachnospiraceae;;Hungatella;EU939444_s	EU939444_s	0	0	0	0	0	0	0	0.00539	0	0	0	0.00539	0	0	0	0	0	0	0	1	0	0	0	1
	Bacteria;;;Proteobacteria;;Gammaproteobacteria;;Gammaproteobacteria_uc;;Gammaproteobacteria_uc_f;;Gammaproteobacteria_uc_g;Gammaproteobacteria_uc_s	Gammaproteobacteria_uc_s	0	0	0	0	0	0	0	0	0	0.00593	0	0.00593	0	0	0	0	0	0	0	0	0	1	0	1
	Bacteria;;;Actinobacteria;;Actinobacteria_c;;Bifidobacteriales;;Bifidobacteriaceae;;Bifidobacterium;Bifidobacterium tissieri	Bifidobacterium tissieri	0	0	0	0	0.00651	0	0	0	0	0	0	0.00651	0	0	0	0	1	0	0	0	0	0	0	1
	Bacteria;;;Proteobacteria;;Betaproteobacteria;;Neisseriales;;Neisseriaceae;;Kingella;Kingella_uc	Kingella_uc	0	0	0	0	0	0	0	0	0.00636	0	0	0.00636	0	0	0	0	0	0	0	0	1	0	0	1
	Bacteria;;;Firmicutes;;Bacilli;;Bacillales;;Planococcaceae;;Sporosarcina;Sporosarcina_uc	Sporosarcina_uc	0	0	0	0	0	0	0	0	0	0.00593	0	0.00593	0	0	0	0	0	0	0	0	0	1	0	1
	Bacteria;;;Firmicutes;;Bacilli;;Lactobacillales;;Lactobacillaceae;;Lactobacillus;KB822409_s	KB822409_s	0	0.00684	0	0	0	0	0	0	0	0	0	0.00684	0	1	0	0	0	0	0	0	0	0	0	1
	Bacteria;;;Proteobacteria;;Epsilonproteobacteria;;Campylobacterales;;Helicobacteraceae;;Helicobacteraceae_uc;Helicobacteraceae_uc_s	Helicobacteraceae_uc_s	0.00646	0	0	0	0	0	0	0	0	0	0	0.00646	1	0	0	0	0	0	0	0	0	0	0	1
	Bacteria;;;Proteobacteria;;Gammaproteobacteria;;Pasteurellales;;Pasteurellaceae;;Aggregatibacter;Aggregatibacter_uc	Aggregatibacter_uc	0	0	0	0	0	0	0.00605	0	0	0	0	0.00605	0	0	0	0	0	0	1	0	0	0	0	1
	Bacteria;;;Proteobacteria;;Betaproteobacteria;;Burkholderiales;;Sutterella_f;;Sutterella;DQ809836_s	DQ809836_s	0	0	0.00765	0	0	0	0	0	0	0	0	0.00765	0	0	1	0	0	0	0	0	0	0	0	1
	Bacteria;;;Firmicutes;;Clostridia;;Clostridiales;;Ruminococcaceae;;Ruminococcus_g2;DQ057453_s	DQ057453_s	0	0.00684	0	0	0	0	0	0	0	0	0	0.00684	0	1	0	0	0	0	0	0	0	0	0	1
	Bacteria;;;Firmicutes;;Clostridia;;Clostridiales;;Lachnospiraceae;;EU842983_g;EU842983_g_uc	EU842983_g_uc	0	0	0	0	0.00651	0	0	0	0	0	0	0.00651	0	0	0	0	1	0	0	0	0	0	0	1
	Bacteria;;;Firmicutes;;Clostridia;;Clostridiales;;Lachnospiraceae;;Eubacterium_g17;Eubacterium_g17_uc	Eubacterium_g17_uc	0	0	0	0	0	0	0	0	0	0	0.00615	0.00615	0	0	0	0	0	0	0	0	0	0	1	1
	Bacteria;;;Bacteroidetes;;Bacteroidetes_uc;;Bacteroidetes_uc_o;;Bacteroidetes_uc_f;;Bacteroidetes_uc_g;Bacteroidetes_uc_s	Bacteroidetes_uc_s	0	0	0.00765	0	0	0	0	0	0	0	0	0.00765	0	0	1	0	0	0	0	0	0	0	0	1
	Bacteria;;;Actinobacteria;;Actinobacteria_c;;Bifidobacteriales;;Bifidobacteriaceae;;Bifidobacterium;Bifidobacterium breve	Bifidobacterium breve	0	0	0	0	0.00651	0	0	0	0	0	0	0.00651	0	0	0	0	1	0	0	0	0	0	0	1
	Bacteria;;;Firmicutes;;Clostridia;;Clostridiales;;Clostridium_g7_f;;Clostridium_g7;EU464266_s	EU464266_s	0	0	0	0	0	0	0	0.00539	0	0	0	0.00539	0	0	0	0	0	0	0	1	0	0	0	1
	Bacteria;;;Firmicutes;;Clostridia;;Clostridiales;;Lachnospiraceae;;Blautia;AF371550_s	AF371550_s	0	0	0	0	0.00651	0	0	0	0	0	0	0.00651	0	0	0	0	1	0	0	0	0	0	0	1
	Bacteria;;;Proteobacteria;;Betaproteobacteria;;Burkholderiales;;Ralstonia_f;;Ralstonia_f_uc;Ralstonia_f_uc_s	Ralstonia_f_uc_s	0	0.00684	0	0	0	0	0	0	0	0	0	0.00684	0	1	0	0	0	0	0	0	0	0	0	1
	Bacteria;;;Firmicutes;;Clostridia;;Clostridiales;;Lachnospiraceae;;Clostridium_g27;Clostridium_g27_uc	Clostridium_g27_uc	0.00646	0	0	0	0	0	0	0	0	0	0	0.00646	1	0	0	0	0	0	0	0	0	0	0	1
	Bacteria;;;Firmicutes;;Bacilli;;Bacillales;;Staphylococcaceae;;Staphylococcaceae_uc;Staphylococcaceae_uc_s	Staphylococcaceae_uc_s	0	0	0	0	0	0	0	0.00539	0	0	0	0.00539	0	0	0	0	0	0	0	1	0	0	0	1
	Bacteria;;;Firmicutes;;Negativicutes;;Selenomonadales;;Veillonellaceae;;Pectinatus;Pectinatus frisingensis	Pectinatus frisingensis	0	0	0.00765	0	0	0	0	0	0	0	0	0.00765	0	0	1	0	0	0	0	0	0	0	0	1
	Bacteria;;;Firmicutes;;Clostridia;;Clostridiales;;Lachnospiraceae;;EF403870_g;EF403870_g_uc	EF403870_g_uc	0	0	0	0	0	0	0	0.00539	0	0	0	0.00539	0	0	0	0	0	0	0	1	0	0	0	1
	Bacteria;;;Bacteroidetes;;Bacteroidia;;Bacteroidales;;Bacteroidaceae;;Bacteroides;Bacteroides fluxus	Bacteroides fluxus	0	0	0.00765	0	0	0	0	0	0	0	0	0.00765	0	0	1	0	0	0	0	0	0	0	0	1
	Bacteria;;;Firmicutes;;Clostridia;;Clostridiales;;Peptostreptococcaceae;;Intestinibacter;Intestinibacter bartlettii	Intestinibacter bartlettii	0	0.00684	0	0	0	0	0	0	0	0	0	0.00684	0	1	0	0	0	0	0	0	0	0	0	1
	Bacteria;;;Firmicutes;;Clostridia;;Clostridiales;;Helcococcus_f;;Parvimonas;Parvimonas_uc	Parvimonas_uc	0	0	0	0	0	0	0.00605	0	0	0	0	0.00605	0	0	0	0	0	0	1	0	0	0	0	1
	Bacteria;;;Firmicutes;;Clostridia;;Clostridiales;;Acidaminobacter_f;;Acidaminobacter_f_uc;Acidaminobacter_f_uc_s	Acidaminobacter_f_uc_s	0	0	0	0	0	0	0	0	0	0	0.00615	0.00615	0	0	0	0	0	0	0	0	0	0	1	1
	Bacteria;;;Firmicutes;;Clostridia;;Clostridiales;;Lachnospiraceae;;Hungatella;GQ867452_s	GQ867452_s	0	0	0	0	0	0	0	0	0	0.00593	0	0.00593	0	0	0	0	0	0	0	0	0	1	0	1
	Bacteria;;;Firmicutes;;Clostridia;;Clostridiales;;Lachnospiraceae;;EU794202_g;EU794239_s	EU794239_s	0	0.00684	0	0	0	0	0	0	0	0	0	0.00684	0	1	0	0	0	0	0	0	0	0	0	1
	Bacteria;;;Proteobacteria;;Betaproteobacteria;;Burkholderiales;;Sutterella_f;;Sutterella;Sutterella stercoricanis	Sutterella stercoricanis	0	0	0	0	0	0	0	0.00539	0	0	0	0.00539	0	0	0	0	0	0	0	1	0	0	0	1
	Bacteria;;;Proteobacteria;;Epsilonproteobacteria;;Campylobacterales;;Helicobacteraceae;;Helicobacter;Helicobacter_uc	Helicobacter_uc	0	0.00684	0	0	0	0	0	0	0	0	0	0.00684	0	1	0	0	0	0	0	0	0	0	0	1
	Bacteria;;;Firmicutes;;Bacilli;;Lactobacillales;;Streptococcaceae;;Streptococcus;Streptococcus gallinaceus	Streptococcus gallinaceus	0.00646	0	0	0	0	0	0	0	0	0	0	0.00646	1	0	0	0	0	0	0	0	0	0	0	1
	Bacteria;;;Firmicutes;;Bacilli;;Lactobacillales;;Streptococcaceae;;Streptococcus;Streptococcus intermedius	Streptococcus intermedius	0	0	0	0	0	0	0	0.00539	0	0	0	0.00539	0	0	0	0	0	0	0	1	0	0	0	1
